# Supplementary material for: In situ 87Rb–87Sr analyses of terrestrial and extraterrestrial samples by LA-MC-ICP-MS/MS with double Wien filter and collision cell technologies
Source: Royal Society of Chemistry journal article supplement (doi:10.1039/d2ja00135g), 2022-01-01
Supplement: d2ja00135g1.pdf [file d2ja00135g1.pdf]

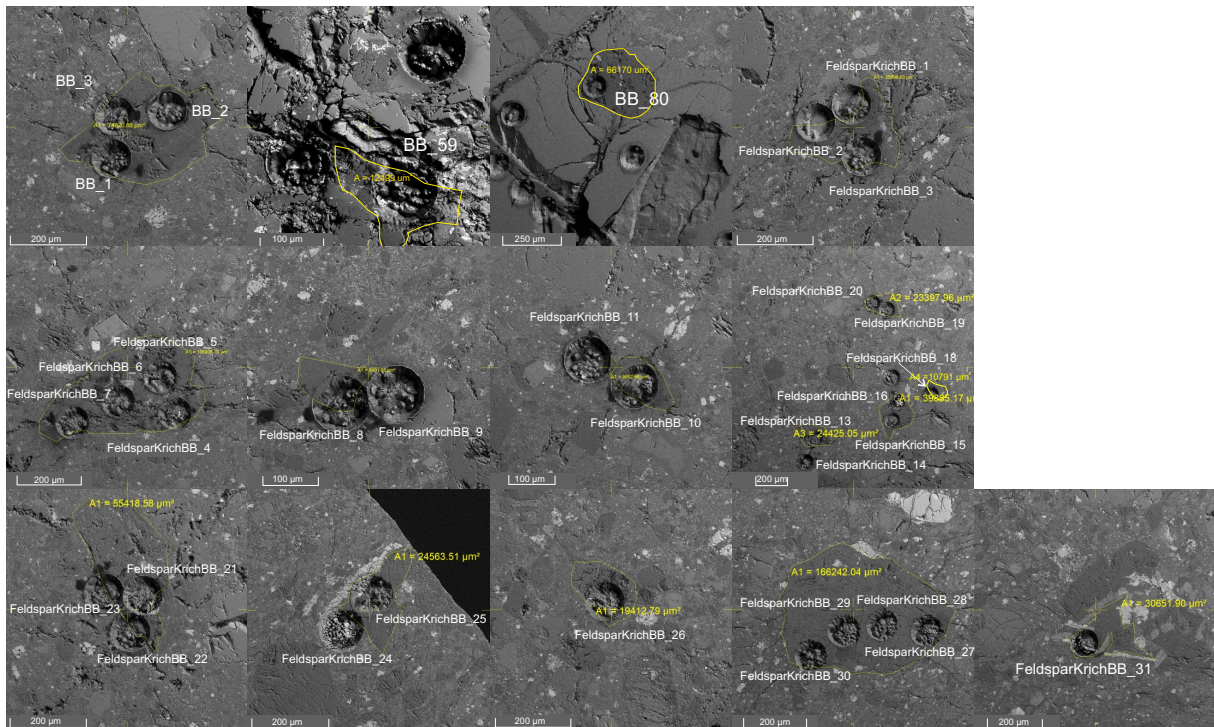

**Fig. S1.** Mosaic showing the locations of the laser ablation pits and the textural context of the K-rich feldspars from NWA 7034 (Black Beauty) with  $^{87}\text{Rb}/^{86}\text{Sr} > 1$  that provide the most leverage in the 2.2 Ga  $^{87}\text{Rb}$ - $^{87}\text{Sr}$  isochron.
