# Supplementary material for: In situ 87Rb–87Sr analyses of terrestrial and extraterrestrial samples by LA-MC-ICP-MS/MS with double Wien filter and collision cell technologies
Source: Royal Society of Chemistry journal article supplement (doi:10.1039/d2ja00135g), 2022-01-01
Supplement: d2ja00135g3.xlsx [file d2ja00135g3.xlsx]

## Sheet: Main_spreadsheet_Do_Not_Touch
							Normalized FG-H					Normalized SRM 610
Index	Label		Count integral 88Sr	X(um)	Y(um)	Z(um)	87Rb/86Sr	±95% CI	87Sr/86Sr	±95% CI	rho	87Rb/86Sr	±95% CI	87Sr/86Sr	±95% CI	rho	Reference 87Rb/86Sr		Reference 87Sr/86Sr		File
6	SRM612_1	20220223_NeomaMSMS_SrF_LA_NIST610_612_Durango_Sronly_export_processed	4.08759e+08											0.708443	0.000788101				0.709063	Woodhead and Hergt (2001)	20220223_NeomaMSMS_SrF_LA_NIST610_612_Durango_Sronly_export_processed
7	SRM612_2	20220223_NeomaMSMS_SrF_LA_NIST610_612_Durango_Sronly_export_processed	4.08652e+08											0.711447	0.000801216				0.709063	Woodhead and Hergt (2001)	20220223_NeomaMSMS_SrF_LA_NIST610_612_Durango_Sronly_export_processed
8	SRM612_3	20220223_NeomaMSMS_SrF_LA_NIST610_612_Durango_Sronly_export_processed	4.13586e+08											0.710476	0.000790462				0.709063	Woodhead and Hergt (2001)	20220223_NeomaMSMS_SrF_LA_NIST610_612_Durango_Sronly_export_processed
9	SRM612_4	20220223_NeomaMSMS_SrF_LA_NIST610_612_Durango_Sronly_export_processed	4.09163e+08											0.709732	0.000847279				0.709063	Woodhead and Hergt (2001)	20220223_NeomaMSMS_SrF_LA_NIST610_612_Durango_Sronly_export_processed
10	SRM612_5	20220223_NeomaMSMS_SrF_LA_NIST610_612_Durango_Sronly_export_processed	3.89594e+08											0.710299	0.000814747				0.709063	Woodhead and Hergt (2001)	20220223_NeomaMSMS_SrF_LA_NIST610_612_Durango_Sronly_export_processed
11	Durango_1	20220223_NeomaMSMS_SrF_LA_NIST610_612_Durango_Sronly_export_processed	4.33862e+09											0.70609	0.000110804				0.706329	Yang et al. (2014)	20220223_NeomaMSMS_SrF_LA_NIST610_612_Durango_Sronly_export_processed
12	Durango_2	20220223_NeomaMSMS_SrF_LA_NIST610_612_Durango_Sronly_export_processed	4.48049e+09											0.706278	0.0001252				0.706329	Yang et al. (2014)	20220223_NeomaMSMS_SrF_LA_NIST610_612_Durango_Sronly_export_processed
13	Durango_3	20220223_NeomaMSMS_SrF_LA_NIST610_612_Durango_Sronly_export_processed	4.62984e+09											0.706279	0.000111773				0.706329	Yang et al. (2014)	20220223_NeomaMSMS_SrF_LA_NIST610_612_Durango_Sronly_export_processed
14	Durango_4	20220223_NeomaMSMS_SrF_LA_NIST610_612_Durango_Sronly_export_processed	4.55619e+09											0.706434	0.000101698				0.706329	Yang et al. (2014)	20220223_NeomaMSMS_SrF_LA_NIST610_612_Durango_Sronly_export_processed
15	Durango_5	20220223_NeomaMSMS_SrF_LA_NIST610_612_Durango_Sronly_export_processed	4.83167e+09											0.706085	0.000114127				0.706329	Yang et al. (2014)	20220223_NeomaMSMS_SrF_LA_NIST610_612_Durango_Sronly_export_processed
6	SRM612_1	20220223_NeomaMSMS_SrF_LA_NIST_610_612_Durango_SrRb_export_processed	1.03931e+09									1.20046	0.134144	0.711296	0.00113065		1.15766	Certificate of analysis	0.709063	Woodhead and Hergt (2001)	20220223_NeomaMSMS_SrF_LA_NIST_610_612_Durango_SrRb_export_processed
7	SRM612_2	20220223_NeomaMSMS_SrF_LA_NIST_610_612_Durango_SrRb_export_processed	8.84551e+08									1.15124	0.119061	0.711499	0.00147525		1.15766	Certificate of analysis	0.709063	Woodhead and Hergt (2001)	20220223_NeomaMSMS_SrF_LA_NIST_610_612_Durango_SrRb_export_processed
8	SRM612_3	20220223_NeomaMSMS_SrF_LA_NIST_610_612_Durango_SrRb_export_processed	1.042e+09									1.15567	0.118382	0.711502	0.000910609		1.15766	Certificate of analysis	0.709063	Woodhead and Hergt (2001)	20220223_NeomaMSMS_SrF_LA_NIST_610_612_Durango_SrRb_export_processed
9	SRM612_4	20220223_NeomaMSMS_SrF_LA_NIST_610_612_Durango_SrRb_export_processed	1.05555e+09									1.17717	0.127544	0.710264	0.000346213		1.15766	Certificate of analysis	0.709063	Woodhead and Hergt (2001)	20220223_NeomaMSMS_SrF_LA_NIST_610_612_Durango_SrRb_export_processed
10	SRM612_5	20220223_NeomaMSMS_SrF_LA_NIST_610_612_Durango_SrRb_export_processed	1.04599e+09									1.16676	4.74981e-06	0.710688	0.000918264		1.15766	Certificate of analysis	0.709063	Woodhead and Hergt (2001)	20220223_NeomaMSMS_SrF_LA_NIST_610_612_Durango_SrRb_export_processed
11	Durango_1	20220223_NeomaMSMS_SrF_LA_NIST_610_612_Durango_SrRb_export_processed	1.10128e+10									-4.60501e-05	4.08409e-05	0.705429	0.00019667				0.706329	Yang et al. (2014)	20220223_NeomaMSMS_SrF_LA_NIST_610_612_Durango_SrRb_export_processed
12	Durango_2	20220223_NeomaMSMS_SrF_LA_NIST_610_612_Durango_SrRb_export_processed	1.05803e+10									5.95535e-05	6.62052e-05	0.70549	0.000212386				0.706329	Yang et al. (2014)	20220223_NeomaMSMS_SrF_LA_NIST_610_612_Durango_SrRb_export_processed
13	Durango_3	20220223_NeomaMSMS_SrF_LA_NIST_610_612_Durango_SrRb_export_processed	9.80336e+09									6.51151e-05	4.61192e-05	0.705361	0.000220077				0.706329	Yang et al. (2014)	20220223_NeomaMSMS_SrF_LA_NIST_610_612_Durango_SrRb_export_processed
14	Durango_4	20220223_NeomaMSMS_SrF_LA_NIST_610_612_Durango_SrRb_export_processed	8.8266e+09									0.000212264	0.000111749	0.705452	0.000241757				0.706329	Yang et al. (2014)	20220223_NeomaMSMS_SrF_LA_NIST_610_612_Durango_SrRb_export_processed
15	Durango_5	20220223_NeomaMSMS_SrF_LA_NIST_610_612_Durango_SrRb_export_processed	9.09454e+09									-4.60501e-05	0.000146011	0.705429	0.000182457				0.706329	Yang et al. (2014)	20220223_NeomaMSMS_SrF_LA_NIST_610_612_Durango_SrRb_export_processed
2	Megacryst_outerrim_1	20220223_NeomaMSMS_SrF_LA_Megacryst_Shap_Sr_export_processed	6.13697e+09											0.709837	0.000101314				0.710863	Davidson et al. (2005)	20220223_NeomaMSMS_SrF_LA_Megacryst_Shap_Sr_export_processed
3	Megacryst_outerrim_2	20220223_NeomaMSMS_SrF_LA_Megacryst_Shap_Sr_export_processed	7.22185e+09											0.710066	0.000117817				0.710863	Davidson et al. (2005)	20220223_NeomaMSMS_SrF_LA_Megacryst_Shap_Sr_export_processed
4	Megacryst_outerrim_3	20220223_NeomaMSMS_SrF_LA_Megacryst_Shap_Sr_export_processed	6.43456e+09											0.710543	0.00014322				0.710863	Davidson et al. (2005)	20220223_NeomaMSMS_SrF_LA_Megacryst_Shap_Sr_export_processed
6	Megacryst_outerrim_1	20220223_NeomaMSMS_SrF_LA_Megacryst_Shap_Sr_export_processed	2.99265e+09											0.710026	0.00018891				0.710863	Davidson et al. (2005)	20220223_NeomaMSMS_SrF_LA_Megacryst_Shap_Sr_export_processed
7	Megacryst_outerrim_2	20220223_NeomaMSMS_SrF_LA_Megacryst_Shap_Sr_export_processed	4.7622e+09											0.709823	0.000178691				0.710863	Davidson et al. (2005)	20220223_NeomaMSMS_SrF_LA_Megacryst_Shap_Sr_export_processed
8	Megacryst_outerrim_3	20220223_NeomaMSMS_SrF_LA_Megacryst_Shap_Sr_export_processed	1.9252e+09											0.709393	0.000247846				0.710863	Davidson et al. (2005)	20220223_NeomaMSMS_SrF_LA_Megacryst_Shap_Sr_export_processed
9	Megacryst_outerrim_4	20220223_NeomaMSMS_SrF_LA_Megacryst_Shap_Sr_export_processed	5.52508e+09											0.710688	0.000239584				0.710863	Davidson et al. (2005)	20220223_NeomaMSMS_SrF_LA_Megacryst_Shap_Sr_export_processed
11	Megacryst_innrerrim_10	20220223_NeomaMSMS_SrF_LA_Megacryst_Shap_Sr_export_processed	7.78582e+09											0.709981	0.000141046				0.708519	Davidson et al. (2005)	20220223_NeomaMSMS_SrF_LA_Megacryst_Shap_Sr_export_processed
12	Megacryst_innrerrim_11	20220223_NeomaMSMS_SrF_LA_Megacryst_Shap_Sr_export_processed	6.82052e+09											0.709519	0.000115992				0.708519	Davidson et al. (2005)	20220223_NeomaMSMS_SrF_LA_Megacryst_Shap_Sr_export_processed
13	Megacryst_innrerrim_12	20220223_NeomaMSMS_SrF_LA_Megacryst_Shap_Sr_export_processed	7.23234e+09											0.710271	0.000245342				0.708519	Davidson et al. (2005)	20220223_NeomaMSMS_SrF_LA_Megacryst_Shap_Sr_export_processed
14	Megacryst_innrerrim_13	20220223_NeomaMSMS_SrF_LA_Megacryst_Shap_Sr_export_processed	9.10589e+09											0.709548	0.000100747				0.708519	Davidson et al. (2005)	20220223_NeomaMSMS_SrF_LA_Megacryst_Shap_Sr_export_processed
16	Megacryst_outercore_18	20220223_NeomaMSMS_SrF_LA_Megacryst_Shap_Sr_export_processed	7.69229e+09											0.714195	0.000110867				0.715535	Davidson et al. (2005)	20220223_NeomaMSMS_SrF_LA_Megacryst_Shap_Sr_export_processed
17	Megacryst_outercore_19	20220223_NeomaMSMS_SrF_LA_Megacryst_Shap_Sr_export_processed	7.41088e+09											0.714873	0.000125344				0.715535	Davidson et al. (2005)	20220223_NeomaMSMS_SrF_LA_Megacryst_Shap_Sr_export_processed
18	Megacryst_outercore_20	20220223_NeomaMSMS_SrF_LA_Megacryst_Shap_Sr_export_processed	7.04856e+09											0.71564	0.000110896				0.715535	Davidson et al. (2005)	20220223_NeomaMSMS_SrF_LA_Megacryst_Shap_Sr_export_processed
19	Megacryst_outercore_21	20220223_NeomaMSMS_SrF_LA_Megacryst_Shap_Sr_export_processed	6.56212e+09											0.719885	0.000104073				0.715535	Davidson et al. (2005)	20220223_NeomaMSMS_SrF_LA_Megacryst_Shap_Sr_export_processed
21	Megacryst_innercore_26	20220223_NeomaMSMS_SrF_LA_Megacryst_Shap_Sr_export_processed	6.15153e+09											0.717581	0.000102792				0.714819	Davidson et al. (2005)	20220223_NeomaMSMS_SrF_LA_Megacryst_Shap_Sr_export_processed
22	Megacryst_innercore_27	20220223_NeomaMSMS_SrF_LA_Megacryst_Shap_Sr_export_processed	6.50483e+09											0.718046	0.000110464				0.714819	Davidson et al. (2005)	20220223_NeomaMSMS_SrF_LA_Megacryst_Shap_Sr_export_processed
23	Megacryst_innercore_28	20220223_NeomaMSMS_SrF_LA_Megacryst_Shap_Sr_export_processed	6.83448e+09											0.717054	9.40306e-05				0.714819	Davidson et al. (2005)	20220223_NeomaMSMS_SrF_LA_Megacryst_Shap_Sr_export_processed
24	Megacryst_innercore_29	20220223_NeomaMSMS_SrF_LA_Megacryst_Shap_Sr_export_processed	6.99084e+09											0.716036	0.000132103				0.714819	Davidson et al. (2005)	20220223_NeomaMSMS_SrF_LA_Megacryst_Shap_Sr_export_processed
2	Megacryst_outerrim_5	20220223_NeomaMSMS_SrF_LA_Megacryst_Shap_RbSr_export_processed	1.63498e+09									1.40507	0.26212	0.714717	0.00162963	0.363583	0.642509	Davidson et al. (2005)	0.710863	Davidson et al. (2005)	20220223_NeomaMSMS_SrF_LA_Megacryst_Shap_RbSr_export_processed
3	Megacryst_outerrim_6	20220223_NeomaMSMS_SrF_LA_Megacryst_Shap_RbSr_export_processed	9.49899e+09									0.578477	0.0653072	0.711709	0.000427134	0.226933	0.642509	Davidson et al. (2005)	0.710863	Davidson et al. (2005)	20220223_NeomaMSMS_SrF_LA_Megacryst_Shap_RbSr_export_processed
4	Megacryst_outerrim_7	20220223_NeomaMSMS_SrF_LA_Megacryst_Shap_RbSr_export_processed	9.41117e+09									0.168651	0.0439701	0.709564	0.000138455	0.202419	0.642509	Davidson et al. (2005)	0.710863	Davidson et al. (2005)	20220223_NeomaMSMS_SrF_LA_Megacryst_Shap_RbSr_export_processed
5	Megacryst_outerrim_8	20220223_NeomaMSMS_SrF_LA_Megacryst_Shap_RbSr_export_processed	8.66066e+09									0.46878	0.0647378	0.711057	0.000315997	0.70591	0.642509	Davidson et al. (2005)	0.710863	Davidson et al. (2005)	20220223_NeomaMSMS_SrF_LA_Megacryst_Shap_RbSr_export_processed
7	Megacryst_innrerrim_14	20220223_NeomaMSMS_SrF_LA_Megacryst_Shap_RbSr_export_processed	8.26895e+09									0.285122	0.186839	0.710156	0.00102393	0.974478	0.240306	Davidson et al. (2005)	0.708519	Davidson et al. (2005)	20220223_NeomaMSMS_SrF_LA_Megacryst_Shap_RbSr_export_processed
8	Megacryst_innrerrim_15	20220223_NeomaMSMS_SrF_LA_Megacryst_Shap_RbSr_export_processed	9.10275e+09									0.292552	0.068287	0.710164	0.000321136	0.825296	0.240306	Davidson et al. (2005)	0.708519	Davidson et al. (2005)	20220223_NeomaMSMS_SrF_LA_Megacryst_Shap_RbSr_export_processed
9	Megacryst_innrerrim_16	20220223_NeomaMSMS_SrF_LA_Megacryst_Shap_RbSr_export_processed	5.94065e+09									0.0562734	0.0207549	0.708988	0.000239321	0.781254	0.240306	Davidson et al. (2005)	0.708519	Davidson et al. (2005)	20220223_NeomaMSMS_SrF_LA_Megacryst_Shap_RbSr_export_processed
10	Megacryst_innrerrim_17	20220223_NeomaMSMS_SrF_LA_Megacryst_Shap_RbSr_export_processed	1.25294e+10									0.0558054	0.00712032	0.708984	0.000142513	0.498516	0.240306	Davidson et al. (2005)	0.708519	Davidson et al. (2005)	20220223_NeomaMSMS_SrF_LA_Megacryst_Shap_RbSr_export_processed
12	Megacryst_outercore_22	20220223_NeomaMSMS_SrF_LA_Megacryst_Shap_RbSr_export_processed	7.089e+09									1.27979	0.114177	0.715001	0.000273347	0.273368	1.45613	Davidson et al. (2005)	0.715535	Davidson et al. (2005)	20220223_NeomaMSMS_SrF_LA_Megacryst_Shap_RbSr_export_processed
13	Megacryst_outercore_23	20220223_NeomaMSMS_SrF_LA_Megacryst_Shap_RbSr_export_processed	7.77215e+09									1.08789	0.102294	0.714064	0.000163273	0.51162	1.45613	Davidson et al. (2005)	0.715535	Davidson et al. (2005)	20220223_NeomaMSMS_SrF_LA_Megacryst_Shap_RbSr_export_processed
14	Megacryst_outercore_24	20220223_NeomaMSMS_SrF_LA_Megacryst_Shap_RbSr_export_processed	5.36456e+09									1.31849	0.141762	0.715106	0.000392252	0.701091	1.45613	Davidson et al. (2005)	0.715535	Davidson et al. (2005)	20220223_NeomaMSMS_SrF_LA_Megacryst_Shap_RbSr_export_processed
15	Megacryst_outercore_25	20220223_NeomaMSMS_SrF_LA_Megacryst_Shap_RbSr_export_processed	6.79813e+09									1.12857	0.115789	0.714121	0.000193942	0.504967	1.45613	Davidson et al. (2005)	0.715535	Davidson et al. (2005)	20220223_NeomaMSMS_SrF_LA_Megacryst_Shap_RbSr_export_processed
17	Megacryst_innercore_30	20220223_NeomaMSMS_SrF_LA_Megacryst_Shap_RbSr_export_processed	7.03725e+09									1.34381	0.130546	0.715089	0.000162642	0.307921	1.33365	Davidson et al. (2005)	0.714819	Davidson et al. (2005)	20220223_NeomaMSMS_SrF_LA_Megacryst_Shap_RbSr_export_processed
18	Megacryst_innercore_31	20220223_NeomaMSMS_SrF_LA_Megacryst_Shap_RbSr_export_processed	6.28969e+09									1.36599	0.200968	0.715339	0.000330099	0.772032	1.33365	Davidson et al. (2005)	0.714819	Davidson et al. (2005)	20220223_NeomaMSMS_SrF_LA_Megacryst_Shap_RbSr_export_processed
19	Megacryst_innercore_32	20220223_NeomaMSMS_SrF_LA_Megacryst_Shap_RbSr_export_processed	6.29035e+09									1.38363	0.149005	0.715246	0.000169781	0.298297	1.33365	Davidson et al. (2005)	0.714819	Davidson et al. (2005)	20220223_NeomaMSMS_SrF_LA_Megacryst_Shap_RbSr_export_processed
20	Megacryst_innercore_33	20220223_NeomaMSMS_SrF_LA_Megacryst_Shap_RbSr_export_processed	6.4685e+09									1.22879	0.127855	0.714563	0.00028874	-0.0517248	1.33365	Davidson et al. (2005)	0.714819	Davidson et al. (2005)	20220223_NeomaMSMS_SrF_LA_Megacryst_Shap_RbSr_export_processed
3	Megacryst_traverse_1	20220223_NeomaMSMS_SrF_LA_Chicago_Run1_RbSr_export_processed	8.88294e+08	56940	20163.7	1431.25	1.9405	0.107726	0.71559	0.00081948	0.187575	1.77188	0.169526	0.716307	0.000805513	0.303417					20220223_NeomaMSMS_SrF_LA_Chicago_Run1_RbSr_export_processed
4	Megacryst_traverse_2	20220223_NeomaMSMS_SrF_LA_Chicago_Run1_RbSr_export_processed	4.17024e+08	56535.4	20380.9	1431.25	3.80612	0.55425	0.721437	0.00144646	0.783442	3.47539	0.57399	0.72216	0.00143945	0.757764					20220223_NeomaMSMS_SrF_LA_Chicago_Run1_RbSr_export_processed
5	Megacryst_traverse_3	20220223_NeomaMSMS_SrF_LA_Chicago_Run1_RbSr_export_processed	7.64204e+08	55926.4	20768.9	1431.25	1.99115	0.202486	0.715579	0.00144496	0.214386	1.81813	0.23293	0.716297	0.00143807	0.251715					20220223_NeomaMSMS_SrF_LA_Chicago_Run1_RbSr_export_processed
6	Megacryst_traverse_4	20220223_NeomaMSMS_SrF_LA_Chicago_Run1_RbSr_export_processed	7.3568e+08	55390.8	21027.9	1431.25	1.7815	0.145813	0.713738	0.000631563	0.402357	1.6267	0.183832	0.714454	0.000612987	0.514241					20220223_NeomaMSMS_SrF_LA_Chicago_Run1_RbSr_export_processed
7	Megacryst_traverse_5	20220223_NeomaMSMS_SrF_LA_Chicago_Run1_RbSr_export_processed	8.35912e+08	54725.6	21399.9	1431.25	1.40416	0.132822	0.712576	0.000493123	0.211863	1.28215	0.157132	0.71329	0.000468846	0.429377					20220223_NeomaMSMS_SrF_LA_Chicago_Run1_RbSr_export_processed
10	Megacryst_traverse_6	20220223_NeomaMSMS_SrF_LA_Chicago_Run1_RbSr_export_processed	7.10124e+08	54030.9	21761.1	1431.25	1.66963	0.107695	0.714543	0.000875715	0.33504	1.48797	0.16178	0.715924	0.000922851	0.23973					20220223_NeomaMSMS_SrF_LA_Chicago_Run1_RbSr_export_processed
11	Megacryst_traverse_7	20220223_NeomaMSMS_SrF_LA_Chicago_Run1_RbSr_export_processed	7.35549e+08	53400.3	21992.3	1431.25	2.19299	0.211893	0.716252	0.000785682	0.591495	1.95439	0.254796	0.717637	0.000837786	0.458645					20220223_NeomaMSMS_SrF_LA_Chicago_Run1_RbSr_export_processed
12	Megacryst_traverse_8	20220223_NeomaMSMS_SrF_LA_Chicago_Run1_RbSr_export_processed	3.8068e+08	52725.1	22446.4	1431.25	3.90726	0.723488	0.722843	0.00231105	0.341964	3.48214	0.713175	0.724241	0.00233352	0.317558					20220223_NeomaMSMS_SrF_LA_Chicago_Run1_RbSr_export_processed
13	Megacryst_traverse_10	20220223_NeomaMSMS_SrF_LA_Chicago_Run1_RbSr_export_processed	5.85004e+08	52007.1	22830.6	1431.25	2.38339	0.113108	0.717684	0.0016505	-0.466283	2.12408	0.211479	0.719071	0.00167845	-0.188368					20220223_NeomaMSMS_SrF_LA_Chicago_Run1_RbSr_export_processed
14	Megacryst_traverse_11	20220223_NeomaMSMS_SrF_LA_Chicago_Run1_RbSr_export_processed	8.10439e+08	51145.3	23449.3	1431.25	1.61934	0.0912909	0.714107	0.00109017	-0.140393	1.44315	0.150246	0.715488	0.00112906	-0.0302504					20220223_NeomaMSMS_SrF_LA_Chicago_Run1_RbSr_export_processed
17	Megacryst_traverse_12	20220223_NeomaMSMS_SrF_LA_Chicago_Run1_RbSr_export_processed	7.85147e+08	50372	24001.7	1431.25	1.48761	0.147282	0.712532	0.00062374	0.318573	1.31062	0.17414	0.714096	0.000674404	0.153747					20220223_NeomaMSMS_SrF_LA_Chicago_Run1_RbSr_export_processed
18	Megacryst_traverse_13	20220223_NeomaMSMS_SrF_LA_Chicago_Run1_RbSr_export_processed	1.00575e+09	49532.3	24576.1	1431.25	1.28821	0.180542	0.712089	0.000379854	0.330508	1.13495	0.188189	0.713652	0.000457059	0.154354					20220223_NeomaMSMS_SrF_LA_Chicago_Run1_RbSr_export_processed
19	Megacryst_traverse_14	20220223_NeomaMSMS_SrF_LA_Chicago_Run1_RbSr_export_processed	8.08156e+08	48560	25040.1	1431.25	1.95135	0.102811	0.714841	0.0011118	0.725804	1.71919	0.177234	0.71641	0.00114281	0.311088					20220223_NeomaMSMS_SrF_LA_Chicago_Run1_RbSr_export_processed
20	Megacryst_traverse_15	20220223_NeomaMSMS_SrF_LA_Chicago_Run1_RbSr_export_processed	6.87123e+08	47720.4	25437.9	1431.25	1.98614	0.261457	0.714807	0.00138443	0.294994	1.74984	0.277676	0.716376	0.00141051	0.214099					20220223_NeomaMSMS_SrF_LA_Chicago_Run1_RbSr_export_processed
21	Megacryst_traverse_16	20220223_NeomaMSMS_SrF_LA_Chicago_Run1_RbSr_export_processed	6.36622e+08	46814.4	25901.9	1431.25	2.69933	0.170447	0.718055	0.00130421	0.257662	2.37818	0.258764	0.719631	0.00133173	0.105454					20220223_NeomaMSMS_SrF_LA_Chicago_Run1_RbSr_export_processed
24	Megacryst_traverse_17	20220223_NeomaMSMS_SrF_LA_Chicago_Run1_RbSr_export_processed	5.7895e+08	46041	26343.8	1431.25	1.76921	0.07198	0.714044	0.0018446	0.4073	1.53858	0.147424	0.715391	0.00185376	0.141209					20220223_NeomaMSMS_SrF_LA_Chicago_Run1_RbSr_export_processed
25	Megacryst_traverse_18	20220223_NeomaMSMS_SrF_LA_Chicago_Run1_RbSr_export_processed	8.88403e+08	45387.3	26584	1431.25	2.02141	0.139774	0.716661	0.000654392	0.179669	1.75791	0.195018	0.718014	0.000671572	0.0346632					20220223_NeomaMSMS_SrF_LA_Chicago_Run1_RbSr_export_processed
26	Megacryst_traverse_19	20220223_NeomaMSMS_SrF_LA_Chicago_Run1_RbSr_export_processed	3.82492e+09	44626.9	26984.6	1431.25	0.247201	0.0484478	0.708517	0.000267285	0.694556	0.214977	0.0460754	0.709854	0.000303966	0.475113					20220223_NeomaMSMS_SrF_LA_Chicago_Run1_RbSr_export_processed
27	Megacryst_traverse_20	20220223_NeomaMSMS_SrF_LA_Chicago_Run1_RbSr_export_processed	9.9148e+08	44229.8	27271.5	1431.25	0.0600648	0.0283464	0.706968	0.000749187	0.80914	0.0522349	0.0250643	0.708302	0.000764196	0.766684					20220223_NeomaMSMS_SrF_LA_Chicago_Run1_RbSr_export_processed
28	Megacryst_traverse_21	20220223_NeomaMSMS_SrF_LA_Chicago_Run1_RbSr_export_processed	1.84537e+09	43999.6	27467.7	1431.25	0.270472	0.0157398	0.708734	0.00055997	-0.179402	0.235214	0.024571	0.710072	0.000579179	-0.187734					20220223_NeomaMSMS_SrF_LA_Chicago_Run1_RbSr_export_processed
31	Megacryst_traverse_22	20220223_NeomaMSMS_SrF_LA_Chicago_Run1_RbSr_export_processed	4.43335e+08	43724	27717.8	1431.25	0.326921	0.0673833	0.709339	0.00153562	0.351889	0.281941	0.0623499	0.710765	0.00154905	0.326168					20220223_NeomaMSMS_SrF_LA_Chicago_Run1_RbSr_export_processed
32	Megacryst_traverse_23	20220223_NeomaMSMS_SrF_LA_Chicago_Run1_RbSr_export_processed	1.10388e+09	43490.2	27835.6	1431.25	0.287655	0.0308347	0.708402	0.000854	0.126766	0.248078	0.0332019	0.709826	0.000874126	0.100519					20220223_NeomaMSMS_SrF_LA_Chicago_Run1_RbSr_export_processed
33	Megacryst_traverse_24	20220223_NeomaMSMS_SrF_LA_Chicago_Run1_RbSr_export_processed	1.70569e+09	43290.8	27987.7	1431.25	0.682833	0.206751	0.710871	0.00117703	0.839226	0.588884	0.184444	0.712299	0.00119291	0.802453					20220223_NeomaMSMS_SrF_LA_Chicago_Run1_RbSr_export_processed
34	Megacryst_traverse_25	20220223_NeomaMSMS_SrF_LA_Chicago_Run1_RbSr_export_processed	1.39098e+09	43062.9	28156.1	1431.25	0.497924	0.0700328	0.710222	0.000743344	0.735105	0.429416	0.0695125	0.711649	0.000766025	0.622109					20220223_NeomaMSMS_SrF_LA_Chicago_Run1_RbSr_export_processed
35	Megacryst_traverse_26	20220223_NeomaMSMS_SrF_LA_Chicago_Run1_RbSr_export_processed	2.30566e+08	42610	28386.3	1431.25	10.2065	0.423507	0.748692	0.00503737	-0.256053	8.80219	0.794324	0.750196	0.00505101	-0.117348					20220223_NeomaMSMS_SrF_LA_Chicago_Run1_RbSr_export_processed
38	Megacryst_traverse_27	20220223_NeomaMSMS_SrF_LA_Chicago_Run1_RbSr_export_processed	5.92159e+08	42457.9	28656.2	1431.25	5.66948	1.45184	0.731701	0.00380313	0.918728	4.93756	1.32292	0.733263	0.00381141	0.883681					20220223_NeomaMSMS_SrF_LA_Chicago_Run1_RbSr_export_processed
39	Megacryst_isochron_1	20220223_NeomaMSMS_SrF_LA_Chicago_Run1_RbSr_export_processed	1.74907e+07	47948.1	30658.5	1327.19	5.89896	1.09275	0.705802	0.0246135	0.829682	5.13742	1.03421	0.707308	0.024666	0.764592					20220223_NeomaMSMS_SrF_LA_Chicago_Run1_RbSr_export_processed
40	Megacryst_isochron_2	20220223_NeomaMSMS_SrF_LA_Chicago_Run1_RbSr_export_processed	1.01111e+08	50107.7	32462.9	1327.19	16.1485	6.36796	0.769957	0.0293081	0.961932	14.0638	5.65552	0.7716	0.0293706	0.943794					20220223_NeomaMSMS_SrF_LA_Chicago_Run1_RbSr_export_processed
41	Megacryst_isochron_3	20220223_NeomaMSMS_SrF_LA_Chicago_Run1_RbSr_export_processed	5.73898e+07	51285.2	32086.6	1327.19	223.238	29.3399	1.86434	0.114012	0.761774	194.419	29.793	1.86832	0.114255	0.654178					20220223_NeomaMSMS_SrF_LA_Chicago_Run1_RbSr_export_processed
42	Megacryst_isochron_4	20220223_NeomaMSMS_SrF_LA_Chicago_Run1_RbSr_export_processed	4.70465e+08	52627.3	30704.8	1327.19	8.66805	7.36776	0.750721	0.0348531	0.995919	7.54902	6.44411	0.752323	0.0349275	0.991864					20220223_NeomaMSMS_SrF_LA_Chicago_Run1_RbSr_export_processed
45	Megacryst_isochron_5	20220223_NeomaMSMS_SrF_LA_Chicago_Run1_RbSr_export_processed	2.98537e+07	44135.4	31231.6	1327.19	340.792	106.803	2.29134	0.488578	0.995163	304.907	98.9658	2.29719	0.489826	0.961091					20220223_NeomaMSMS_SrF_LA_Chicago_Run1_RbSr_export_processed
46	Megacryst_isochron_6	20220223_NeomaMSMS_SrF_LA_Chicago_Run1_RbSr_export_processed	2.30578e+08	43738.5	31329	1327.19	10.7928	0.611556	0.745932	0.00278567	-0.268298	9.6563	0.982046	0.747835	0.00280806	-0.111407					20220223_NeomaMSMS_SrF_LA_Chicago_Run1_RbSr_export_processed
47	Megacryst_isochron_7	20220223_NeomaMSMS_SrF_LA_Chicago_Run1_RbSr_export_processed	106205	43187.6	30822.3	1327.19	0.789353	4.30276	#VALUE!	#VALUE!	#VALUE!	0.706235	3.85015	#VALUE!	#VALUE!	#VALUE!					20220223_NeomaMSMS_SrF_LA_Chicago_Run1_RbSr_export_processed
48	Megacryst_isochron_8	20220223_NeomaMSMS_SrF_LA_Chicago_Run1_RbSr_export_processed	3.24717e+08	46902.4	32397.9	1327.19	21.9216	12.3893	0.821304	0.0551845	0.987552	19.6133	11.2078	0.8234	0.0553262	0.977062					20220223_NeomaMSMS_SrF_LA_Chicago_Run1_RbSr_export_processed
49	Megacryst_isochron_9	20220223_NeomaMSMS_SrF_LA_Chicago_Run1_RbSr_export_processed	307948	42131.7	28562.3	1327.19	0.426776	0.311091	#VALUE!	#VALUE!	#VALUE!	0.381837	0.280196	#VALUE!	#VALUE!	#VALUE!					20220223_NeomaMSMS_SrF_LA_Chicago_Run1_RbSr_export_processed
52	Megacryst_isochron_10	20220223_NeomaMSMS_SrF_LA_Chicago_Run1_RbSr_export_processed	580336	41715.4	27929.5	1327.19	0.0545208	0.122763	0.322847	0.446041	0.685642	0.049927	0.112509	0.32371	0.447234	0.685098					20220223_NeomaMSMS_SrF_LA_Chicago_Run1_RbSr_export_processed
53	Megacryst_isochron_11	20220223_NeomaMSMS_SrF_LA_Chicago_Run1_RbSr_export_processed	1.35907e+07	40373.9	26806.5	1327.19	892.26	94.644	4.85812	0.237824	0.778722	817.081	113.649	4.87111	0.238468	0.595415					20220223_NeomaMSMS_SrF_LA_Chicago_Run1_RbSr_export_processed
54	Megacryst_isochron_12	20220223_NeomaMSMS_SrF_LA_Chicago_Run1_RbSr_export_processed	2.34252e+07	40414.6	26464.1	1327.19	657.582	423.685	3.95381	1.68636	0.972295	602.176	391.751	3.96438	1.69087	0.96299					20220223_NeomaMSMS_SrF_LA_Chicago_Run1_RbSr_export_processed
55	Megacryst_isochron_13	20220223_NeomaMSMS_SrF_LA_Chicago_Run1_RbSr_export_processed	3.80368e+07	40270.4	26708.5	1327.19	177.219	36.6855	2.10913	0.170145	0.752683	162.287	36.6304	2.11477	0.170602	0.690881					20220223_NeomaMSMS_SrF_LA_Chicago_Run1_RbSr_export_processed
56	Megacryst_isochron_14	20220223_NeomaMSMS_SrF_LA_Chicago_Run1_RbSr_export_processed	3.19113e+08	40292.7	27057.1	1327.19	8.06255	1.0642	0.737791	0.0042565	-0.654607	7.38322	1.17941	0.739764	0.00427779	-0.528048					20220223_NeomaMSMS_SrF_LA_Chicago_Run1_RbSr_export_processed
59	Megacryst_isochron_15	20220223_NeomaMSMS_SrF_LA_Chicago_Run1_RbSr_export_processed	2.21604e+07	44375.5	31279.6	1327.19	570.357	182.437	3.39191	0.767065	0.931204	526.987	176.402	3.3991	0.768692	0.889946					20220223_NeomaMSMS_SrF_LA_Chicago_Run1_RbSr_export_processed
60	Megacryst_isochron_16	20220223_NeomaMSMS_SrF_LA_Chicago_Run1_RbSr_export_processed	2.12019e+07	44476.5	31065.9	1327.19	579.018	371.31	3.38719	1.39977	0.987988	534.99	347.113	3.39437	1.40273	0.97653					20220223_NeomaMSMS_SrF_LA_Chicago_Run1_RbSr_export_processed
61	Megacryst_isochron_17	20220223_NeomaMSMS_SrF_LA_Chicago_Run1_RbSr_export_processed	7.5086e+07	47948.1	30797.1	1327.19	22.3858	8.51201	0.791978	0.0344547	0.923346	20.6836	8.12522	0.793657	0.0345277	0.894255					20220223_NeomaMSMS_SrF_LA_Chicago_Run1_RbSr_export_processed
62	BB_1	20220223_NeomaMSMS_SrF_LA_Chicago_Run1_RbSr_export_processed	4.29281e+08	45591.8	48684.9	995.63	4.75984	0.326157	0.805515	0.0140889	0.566326	4.3979	0.528307	0.807223	0.0141185	0.327153					20220223_NeomaMSMS_SrF_LA_Chicago_Run1_RbSr_export_processed
63	BB_2	20220223_NeomaMSMS_SrF_LA_Chicago_Run1_RbSr_export_processed	2.59988e+08	45544	48867	995.63	7.99201	1.71984	0.853064	0.0197928	0.983462	7.3843	1.74813	0.854873	0.0198345	0.895554					20220223_NeomaMSMS_SrF_LA_Chicago_Run1_RbSr_export_processed
66	BB_3	20220223_NeomaMSMS_SrF_LA_Chicago_Run1_RbSr_export_processed	2.85551e+08	45651.9	48780.4	995.63	9.9656	2.89946	0.880849	0.0214693	0.498484	9.18304	2.82851	0.882663	0.0215162	0.475202					20220223_NeomaMSMS_SrF_LA_Chicago_Run1_RbSr_export_processed
67	BB_4	20220223_NeomaMSMS_SrF_LA_Chicago_Run1_RbSr_export_processed	1.04114e+09	46702.8	48991.8	1071.56	0.0706096	0.00761491	0.708257	0.000661809	-0.546052	0.0650649	0.00961839	0.709715	0.00071772	-0.147202					20220223_NeomaMSMS_SrF_LA_Chicago_Run1_RbSr_export_processed
68	BB_5	20220223_NeomaMSMS_SrF_LA_Chicago_Run1_RbSr_export_processed	3.25116e+08	46354	49128.8	1076.25	0.0660481	0.0455091	0.709427	0.00487163	0.579465	0.0608616	0.0423845	0.710888	0.0048894	0.579313					20220223_NeomaMSMS_SrF_LA_Chicago_Run1_RbSr_export_processed
69	BB_6	20220223_NeomaMSMS_SrF_LA_Chicago_Run1_RbSr_export_processed	5.99199e+08	46389.8	49244	1021.25	0.081231	0.00471891	0.714665	0.000974633	0.0561955	0.0748522	0.00872827	0.716137	0.00101515	0.226707					20220223_NeomaMSMS_SrF_LA_Chicago_Run1_RbSr_export_processed
70	BB_7	20220223_NeomaMSMS_SrF_LA_Chicago_Run1_RbSr_export_processed	6.96378e+08	46780.6	49265.8	1086.88	0.0741693	0.01004	0.713758	0.00246255	0.386403	0.068345	0.0115474	0.715228	0.00248307	0.36395					20220223_NeomaMSMS_SrF_LA_Chicago_Run1_RbSr_export_processed
73	BB_8	20220223_NeomaMSMS_SrF_LA_Chicago_Run1_RbSr_export_processed	3.56875e+08	46624.9	49293.9	1093.13	0.08317	0.0213998	0.716883	0.000699942	-0.610386	0.075045	0.0205156	0.718356	0.000720328	-0.48586					20220223_NeomaMSMS_SrF_LA_Chicago_Run1_RbSr_export_processed
74	BB_9	20220223_NeomaMSMS_SrF_LA_Chicago_Run1_RbSr_export_processed	4.14317e+08	46433.4	49353	1083.44	0.0943219	0.00801886	0.711586	0.00126361	0.221199	0.0851074	0.0106837	0.713049	0.00127664	0.238257					20220223_NeomaMSMS_SrF_LA_Chicago_Run1_RbSr_export_processed
75	BB_10	20220223_NeomaMSMS_SrF_LA_Chicago_Run1_RbSr_export_processed	3.82958e+08	46332.3	49331.1	1054.69	0.0773355	0.0202273	0.712294	0.0011973	0.26633	0.0697804	0.0193558	0.713757	0.00121079	0.291678					20220223_NeomaMSMS_SrF_LA_Chicago_Run1_RbSr_export_processed
76	BB_11	20220223_NeomaMSMS_SrF_LA_Chicago_Run1_RbSr_export_processed	4.48635e+08	46481.7	49659.6	1083.75	0.0826773	0.00428439	0.716016	0.00105789	-0.451234	0.0746004	0.00790057	0.717487	0.00107266	-0.0909054					20220223_NeomaMSMS_SrF_LA_Chicago_Run1_RbSr_export_processed
77	BB_12	20220223_NeomaMSMS_SrF_LA_Chicago_Run1_RbSr_export_processed	8.14978e+08	46629.6	49435.4	1056.88	0.0612074	0.00567004	0.71107	0.000767994	0.126644	0.0552279	0.00722454	0.712531	0.000786603	0.227307					20220223_NeomaMSMS_SrF_LA_Chicago_Run1_RbSr_export_processed
80	BB_13	20220223_NeomaMSMS_SrF_LA_Chicago_Run1_RbSr_export_processed	4.44204e+08	46485.6	48965	1077.19	0.137012	0.0195218	0.718506	0.00134083	-0.522105	0.123483	0.0208036	0.719696	0.00133581	-0.466189					20220223_NeomaMSMS_SrF_LA_Chicago_Run1_RbSr_export_processed
81	BB_14	20220223_NeomaMSMS_SrF_LA_Chicago_Run1_RbSr_export_processed	3.68868e+08	46811.9	49109.8	1084.69	0.101056	0.0220016	0.715489	0.00226066	-0.255069	0.0910773	0.021453	0.716673	0.00226015	-0.245564					20220223_NeomaMSMS_SrF_LA_Chicago_Run1_RbSr_export_processed
82	BB_15	20220223_NeomaMSMS_SrF_LA_Chicago_Run1_RbSr_export_processed	5.90691e+08	46393.4	49035.2	1048.13	0.0646299	0.0023501	0.71273	0.000901069	0.546415	0.0582481	0.00564863	0.71391	0.00089192	0.149943					20220223_NeomaMSMS_SrF_LA_Chicago_Run1_RbSr_export_processed
83	BB_16	20220223_NeomaMSMS_SrF_LA_Chicago_Run1_RbSr_export_processed	7.88218e+08	46538.2	49212.3	1078.44	0.0532251	0.00277204	0.711903	0.00107526	0.343252	0.0479694	0.00498385	0.713082	0.00106816	0.128821					20220223_NeomaMSMS_SrF_LA_Chicago_Run1_RbSr_export_processed
84	BB_17	20220223_NeomaMSMS_SrF_LA_Chicago_Run1_RbSr_export_processed	5.95696e+08	46694.8	49143.5	1083.44	0.0661421	0.00745325	0.715119	0.00104616	0.729824	0.0596109	0.00859308	0.716303	0.00103868	0.542307					20220223_NeomaMSMS_SrF_LA_Chicago_Run1_RbSr_export_processed
87	BB_18	20220223_NeomaMSMS_SrF_LA_Chicago_Run1_RbSr_export_processed	7.81198e+08	47400.9	49446.8	1115.63	0.0454604	0.00346723	0.702189	0.000875744	0.546418	0.0403442	0.00490004	0.703431	0.0009092	0.397545					20220223_NeomaMSMS_SrF_LA_Chicago_Run1_RbSr_export_processed
88	BB_19	20220223_NeomaMSMS_SrF_LA_Chicago_Run1_RbSr_export_processed	7.12408e+08	47304.4	49686.9	1056.25	0.0463688	0.000976521	0.7046	0.000689982	-0.110867	0.0411504	0.00398502	0.705846	0.000731543	0.0811698					20220223_NeomaMSMS_SrF_LA_Chicago_Run1_RbSr_export_processed
89	BB_20	20220223_NeomaMSMS_SrF_LA_Chicago_Run1_RbSr_export_processed	1.01271e+09	47895	48605.6	1074.38	0.00758209	0.000348614	0.702403	0.000591621	-0.456273	0.00672879	0.000707278	0.703644	0.000638978	-0.0758175					20220223_NeomaMSMS_SrF_LA_Chicago_Run1_RbSr_export_processed
90	BB_21	20220223_NeomaMSMS_SrF_LA_Chicago_Run1_RbSr_export_processed	8.93886e+08	47969.3	48791.2	1108.13	0.0101265	0.00235879	0.701479	0.00110497	0.855975	0.00898687	0.00225912	0.702719	0.00113233	0.801119					20220223_NeomaMSMS_SrF_LA_Chicago_Run1_RbSr_export_processed
91	BB_22	20220223_NeomaMSMS_SrF_LA_Chicago_Run1_RbSr_export_processed	7.4412e+08	48053.5	48491.7	1122.5	0.0159075	0.000436268	0.702342	0.00184665	0.282207	0.0141173	0.00138944	0.703584	0.00186526	0.117976					20220223_NeomaMSMS_SrF_LA_Chicago_Run1_RbSr_export_processed
94	BB_23	20220223_NeomaMSMS_SrF_LA_Chicago_Run1_RbSr_export_processed	1.10232e+06	48938.9	46419.8	1124.69	-0.982675	0.629121	#VALUE!	#VALUE!	#VALUE!	-0.878937	-0.568456	#VALUE!	#VALUE!	#VALUE!					20220223_NeomaMSMS_SrF_LA_Chicago_Run1_RbSr_export_processed
95	BB_24	20220223_NeomaMSMS_SrF_LA_Chicago_Run1_RbSr_export_processed	1.14671e+06	48810.1	46565.9	1135	0.386606	1.19503	0.734876	9.33619	#VALUE!	0.345793	1.06935	0.736386	9.35537	#VALUE!					20220223_NeomaMSMS_SrF_LA_Chicago_Run1_RbSr_export_processed
96	BB_25	20220223_NeomaMSMS_SrF_LA_Chicago_Run1_RbSr_export_processed	1.52987e+06	48958.7	46112.9	1138.13	-0.148968	-2.36432	0.765596	1.12198	#VALUE!	-0.133242	-2.11476	0.767169	1.12428	#VALUE!					20220223_NeomaMSMS_SrF_LA_Chicago_Run1_RbSr_export_processed
97	BB_26	20220223_NeomaMSMS_SrF_LA_Chicago_Run1_RbSr_export_processed	1.12097e+06	48656.6	46308.4	1136.56	0.672927	8.6394	-0.441846	-24.3731	#VALUE!	0.601889	7.72757	-0.442753	-24.4231	#VALUE!					20220223_NeomaMSMS_SrF_LA_Chicago_Run1_RbSr_export_processed
98	BB_27	20220223_NeomaMSMS_SrF_LA_Chicago_Run1_RbSr_export_processed	-1.39312e+07	49848.2	46717.8	1161.56	-0.0102031	-0.0334368	0.6773	0.0418338	0.255974	-0.00912595	-0.0299187	0.678692	0.0419199	0.255767					20220223_NeomaMSMS_SrF_LA_Chicago_Run1_RbSr_export_processed
101	BB_28	20220223_NeomaMSMS_SrF_LA_Chicago_Run1_RbSr_export_processed	1.09977e+06	49868	46873.7	1169.38	-1.21687	-0.362818	-0.137306	-0.894406	#VALUE!	-1.09519	-0.33793	-0.137561	-0.89607	#VALUE!					20220223_NeomaMSMS_SrF_LA_Chicago_Run1_RbSr_export_processed
102	BB_29	20220223_NeomaMSMS_SrF_LA_Chicago_Run1_RbSr_export_processed	9.08689e+08	49085.6	48277.5	1147.19	0.0146079	0.000686783	0.702331	0.000772553	-0.258309	0.0131472	0.00121362	0.703638	0.000781087	-0.0410532					20220223_NeomaMSMS_SrF_LA_Chicago_Run1_RbSr_export_processed
103	BB_30	20220223_NeomaMSMS_SrF_LA_Chicago_Run1_RbSr_export_processed	7.08827e+08	48956.8	48403.8	1169.38	0.0206394	0.0013558	0.701151	0.000882567	-0.104197	0.0185756	0.00191482	0.702455	0.000890406	0.0041028					20220223_NeomaMSMS_SrF_LA_Chicago_Run1_RbSr_export_processed
104	BB_31	20220223_NeomaMSMS_SrF_LA_Chicago_Run1_RbSr_export_processed	8.77195e+08	49152.4	48458.2	1169.38	0.0337827	0.00220101	0.702842	0.00116964	0.435293	0.0304046	0.00312379	0.70415	0.00117652	0.328245					20220223_NeomaMSMS_SrF_LA_Chicago_Run1_RbSr_export_processed
105	BB_32	20220223_NeomaMSMS_SrF_LA_Chicago_Run1_RbSr_export_processed	6.83659e+08	49603	48218	1169.38	0.0597254	0.00627719	0.70444	0.000967921	0.513539	0.0537532	0.00708177	0.70575	0.000975429	0.45754					20220223_NeomaMSMS_SrF_LA_Chicago_Run1_RbSr_export_processed
108	BB_33	20220223_NeomaMSMS_SrF_LA_Chicago_Run1_RbSr_export_processed	7.43071e+08	49622.8	48388.9	1169.38	0.113781	0.00761106	0.705136	0.000875536	0.18964	0.0995528	0.0105452	0.706714	0.000956846	0.327988					20220223_NeomaMSMS_SrF_LA_Chicago_Run1_RbSr_export_processed
109	BB_34	20220223_NeomaMSMS_SrF_LA_Chicago_Run1_RbSr_export_processed	5.9402e+08	49761.4	48294.8	1169.38	0.205416	0.0453735	0.712334	0.000822858	0.165708	0.179729	0.0423551	0.713928	0.000910314	0.244836					20220223_NeomaMSMS_SrF_LA_Chicago_Run1_RbSr_export_processed
110	BB_35	20220223_NeomaMSMS_SrF_LA_Chicago_Run1_RbSr_export_processed	2.32929e+08	49949.7	48042.1	1196.56	0.161753	0.0283159	0.726973	0.00189918	0.786115	0.141526	0.0273663	0.7286	0.00194364	0.757609					20220223_NeomaMSMS_SrF_LA_Chicago_Run1_RbSr_export_processed
111	BB_36	20220223_NeomaMSMS_SrF_LA_Chicago_Run1_RbSr_export_processed	2.24025e+08	50076	47977.8	1203.44	0.177651	0.0195253	0.72922	0.00389341	-0.129517	0.155436	0.0213268	0.730852	0.00392202	-0.0607285					20220223_NeomaMSMS_SrF_LA_Chicago_Run1_RbSr_export_processed
112	BB_37	20220223_NeomaMSMS_SrF_LA_Chicago_Run1_RbSr_export_processed	1.57797e+08	50227	47930.7	1192.19	0.161666	0.0194684	0.717554	0.00788581	-0.902108	0.141449	0.0206185	0.71916	0.00791299	-0.724868					20220223_NeomaMSMS_SrF_LA_Chicago_Run1_RbSr_export_processed
115	BB_38	20220223_NeomaMSMS_SrF_LA_Chicago_Run1_RbSr_export_processed	2.50994e+08	50071	48299.6	1203.75	0.15011	0.00861805	0.729179	0.00266069	0.520188	0.130527	0.0122188	0.731262	0.00269678	0.450571					20220223_NeomaMSMS_SrF_LA_Chicago_Run1_RbSr_export_processed
116	BB_39	20220223_NeomaMSMS_SrF_LA_Chicago_Run1_RbSr_export_processed	1.50843e+08	50194.8	48391.2	1197.5	0.153834	0.00480002	0.71548	0.00749803	0.575415	0.133766	0.0107351	0.717524	0.00752922	0.278738					20220223_NeomaMSMS_SrF_LA_Chicago_Run1_RbSr_export_processed
117	BB_40	20220223_NeomaMSMS_SrF_LA_Chicago_Run1_RbSr_export_processed	5.71844e+08	51068.1	47767.3	1232.81	0.120812	0.00539441	0.712369	0.00109052	0.400721	0.105051	0.00907386	0.714404	0.00115842	0.528101					20220223_NeomaMSMS_SrF_LA_Chicago_Run1_RbSr_export_processed
118	BB_41	20220223_NeomaMSMS_SrF_LA_Chicago_Run1_RbSr_export_processed	1.92356e+08	50882.5	47529.6	1211.56	0.0627269	0.0113465	0.713964	0.0032984	-0.674915	0.0545439	0.0106587	0.716003	0.0033299	-0.569348					20220223_NeomaMSMS_SrF_LA_Chicago_Run1_RbSr_export_processed
119	BB_42	20220223_NeomaMSMS_SrF_LA_Chicago_Run1_RbSr_export_processed	1.29663e+08	51787.6	47426	1169.38	0.0878684	0.0248161	0.712025	0.00664703	0.387844	0.0764056	0.022306	0.714059	0.00667694	0.391646					20220223_NeomaMSMS_SrF_LA_Chicago_Run1_RbSr_export_processed
122	BB_43	20220223_NeomaMSMS_SrF_LA_Chicago_Run1_RbSr_export_processed	9.9828e+08	52098	47450.7	1243.13	0.0275804	0.000772442	0.702847	0.000664625	-0.415275	0.0240191	0.00171038	0.704926	0.000664611	0.209268					20220223_NeomaMSMS_SrF_LA_Chicago_Run1_RbSr_export_processed
123	BB_44	20220223_NeomaMSMS_SrF_LA_Chicago_Run1_RbSr_export_processed	1.53046e+09	52486.7	47600.9	1284.69	0.00188269	0.000836573	0.708774	0.00163654	0.893356	0.00163959	0.000736415	0.710871	0.00164057	0.908418					20220223_NeomaMSMS_SrF_LA_Chicago_Run1_RbSr_export_processed
124	BB_45	20220223_NeomaMSMS_SrF_LA_Chicago_Run1_RbSr_export_processed	1.63357e+09	52457	47776.7	1278.44	0.00522316	0.00287017	0.708361	0.000521072	-0.251222	0.00454872	0.00251723	0.710456	0.000520046	-0.188855					20220223_NeomaMSMS_SrF_LA_Chicago_Run1_RbSr_export_processed
125	BB_46	20220223_NeomaMSMS_SrF_LA_Chicago_Run1_RbSr_export_processed	7.01177e+08	53570.1	50011.6	1352.5	0.0804806	0.00364187	0.710775	0.00118807	0.598661	0.0700885	0.00557813	0.712878	0.00119045	0.529174					20220223_NeomaMSMS_SrF_LA_Chicago_Run1_RbSr_export_processed
126	BB_47	20220223_NeomaMSMS_SrF_LA_Chicago_Run1_RbSr_export_processed	5.24982e+08	53306.9	50094.1	1272.5	0.0148071	0.00467898	0.701065	0.000800731	0.551519	0.0128951	0.00416134	0.703139	0.000801465	0.609246					20220223_NeomaMSMS_SrF_LA_Chicago_Run1_RbSr_export_processed
129	BB_48	20220223_NeomaMSMS_SrF_LA_Chicago_Run1_RbSr_export_processed	3.81242e+08	53752.5	50185.7	1308.44	0.429698	0.0844757	0.732096	0.00267358	0.826338	0.371998	0.0791558	0.73386	0.00268921	0.786654					20220223_NeomaMSMS_SrF_LA_Chicago_Run1_RbSr_export_processed
130	BB_49	20220223_NeomaMSMS_SrF_LA_Chicago_Run1_RbSr_export_processed	7.583e+08	53222.5	50868	1349.69	0.0240431	0.000539785	0.702779	0.000622922	0.0603349	0.0208146	0.00175791	0.704472	0.000659842	0.269569					20220223_NeomaMSMS_SrF_LA_Chicago_Run1_RbSr_export_processed
131	BB_50	20220223_NeomaMSMS_SrF_LA_Chicago_Run1_RbSr_export_processed	8.31308e+08	52861.2	50965.4	1349.69	0.028643	0.00201794	0.702485	0.000945586	0.464855	0.0247969	0.00266979	0.704176	0.000971543	0.432233					20220223_NeomaMSMS_SrF_LA_Chicago_Run1_RbSr_export_processed
132	BB_51	20220223_NeomaMSMS_SrF_LA_Chicago_Run1_RbSr_export_processed	8.37754e+08	53447.8	51118	1349.69	0.014488	0.00154826	0.700311	0.00107086	-0.546027	0.0125426	0.00168504	0.701998	0.00109427	-0.32997					20220223_NeomaMSMS_SrF_LA_Chicago_Run1_RbSr_export_processed
133	BB_52	20220223_NeomaMSMS_SrF_LA_Chicago_Run1_RbSr_export_processed	8.80405e+08	53322.7	51150.2	1349.69	0.0248884	0.00237134	0.701646	0.000820757	0.362673	0.0215464	0.00270034	0.703336	0.000849843	0.399813					20220223_NeomaMSMS_SrF_LA_Chicago_Run1_RbSr_export_processed
136	BB_53	20220223_NeomaMSMS_SrF_LA_Chicago_Run1_RbSr_export_processed	8.73159e+08	52904.8	51148.9	1349.69	0.370109	0.032059	0.711378	0.00167297	0.60064	0.315449	0.0386237	0.712058	0.00167877	0.429014					20220223_NeomaMSMS_SrF_LA_Chicago_Run1_RbSr_export_processed
137	BB_54	20220223_NeomaMSMS_SrF_LA_Chicago_Run1_RbSr_export_processed	8.51269e+08	52990.3	51416.3	1349.69	0.026585	0.00827781	0.703813	0.000944447	0.170023	0.0226588	0.00732271	0.704486	0.000952603	0.16597					20220223_NeomaMSMS_SrF_LA_Chicago_Run1_RbSr_export_processed
138	BB_55	20220223_NeomaMSMS_SrF_LA_Chicago_Run1_RbSr_export_processed	1.36889e+08	52233.5	48350.2	1278.13	0.147651	0.0482656	0.726927	0.0313882	-0.0140279	0.125845	0.0425545	0.727622	0.0314185	-0.0134588					20220223_NeomaMSMS_SrF_LA_Chicago_Run1_RbSr_export_processed
139	BB_56	20220223_NeomaMSMS_SrF_LA_Chicago_Run1_RbSr_export_processed	1.49466e+08	52097.2	48546	1280.94	0.0924847	0.0139246	0.709775	0.0127238	-0.137171	0.078826	0.0136888	0.710454	0.0127365	-0.118444					20220223_NeomaMSMS_SrF_LA_Chicago_Run1_RbSr_export_processed
140	BB_57	20220223_NeomaMSMS_SrF_LA_Chicago_Run1_RbSr_export_processed	5.42219e+08	51662.3	49403	1265.63	0.00715024	0.00255931	0.706294	0.000956973	0.264994	0.00609425	0.00224418	0.706969	0.000965097	0.258608					20220223_NeomaMSMS_SrF_LA_Chicago_Run1_RbSr_export_processed
143	BB_58	20220223_NeomaMSMS_SrF_LA_Chicago_Run1_RbSr_export_processed	7.52514e+07	51547.2	49163.4	1262.81	0.0789902	0.0168734	0.704976	0.0122274	-0.629605	0.0699592	0.015748	0.705118	0.0122273	-0.598874					20220223_NeomaMSMS_SrF_LA_Chicago_Run1_RbSr_export_processed
144	BB_59	20220223_NeomaMSMS_SrF_LA_Chicago_Run1_RbSr_export_processed	2.68544e+08	51464.2	49312.5	1233.13	1.80439	0.114381	0.758621	0.00477664	0.360816	1.59809	0.152105	0.758773	0.00477001	0.232336					20220223_NeomaMSMS_SrF_LA_Chicago_Run1_RbSr_export_processed
145	BB_66	20220223_NeomaMSMS_SrF_LA_Chicago_Run1_RbSr_export_processed	4.2401e+08	51492.2	47376.5	1169.38	0.181106	0.0142887	0.724813	0.00208944	0.178344	0.1604	0.0170246	0.724959	0.00207398	0.117122					20220223_NeomaMSMS_SrF_LA_Chicago_Run1_RbSr_export_processed
146	BB_67	20220223_NeomaMSMS_SrF_LA_Chicago_Run1_RbSr_export_processed	1.04868e+09	47809.9	53397.5	1233.13	0.236119	0.0148876	0.718692	0.000713654	0.141381	0.209123	0.019857	0.718836	0.000666697	0.0437505					20220223_NeomaMSMS_SrF_LA_Chicago_Run1_RbSr_export_processed
147	BB_68	20220223_NeomaMSMS_SrF_LA_Chicago_Run1_RbSr_export_processed	9.01314e+08	47615.5	53356	1233.13	0.247532	0.0338614	0.720684	0.00119068	0.295731	0.219232	0.0337886	0.720829	0.00116314	0.248652					20220223_NeomaMSMS_SrF_LA_Chicago_Run1_RbSr_export_processed
150	BB_69	20220223_NeomaMSMS_SrF_LA_Chicago_Run1_RbSr_export_processed	6.47828e+08	47463.6	53331.3	1233.13	0.370337	0.140224	0.721511	0.00288307	0.592165	0.322173	0.123993	0.721971	0.00287607	0.589987					20220223_NeomaMSMS_SrF_LA_Chicago_Run1_RbSr_export_processed
151	BB_70	20220223_NeomaMSMS_SrF_LA_Chicago_Run1_RbSr_export_processed	5.15881e+08	47340.5	53318.4	1226.25	0.455359	0.0616164	0.720889	0.00106854	-0.431978	0.396138	0.0601589	0.721349	0.00104518	-0.354673					20220223_NeomaMSMS_SrF_LA_Chicago_Run1_RbSr_export_processed
152	BB_71	20220223_NeomaMSMS_SrF_LA_Chicago_Run1_RbSr_export_processed	1.10474e+09	46825.8	53258.8	1104.38	0.32905	0.0274497	0.717487	0.000772308	0.659233	0.286256	0.0309788	0.717945	0.000739497	0.608203					20220223_NeomaMSMS_SrF_LA_Chicago_Run1_RbSr_export_processed
153	BB_72	20220223_NeomaMSMS_SrF_LA_Chicago_Run1_RbSr_export_processed	1.18649e+09	46693.6	53244.6	1154.69	0.278734	0.0144331	0.716399	0.00051187	0.116286	0.242484	0.020907	0.716856	0.000460578	0.232913					20220223_NeomaMSMS_SrF_LA_Chicago_Run1_RbSr_export_processed
154	BB_73	20220223_NeomaMSMS_SrF_LA_Chicago_Run1_RbSr_export_processed	8.42664e+08	46935.4	53196.9	1126.88	0.26328	0.00929263	0.719571	0.000941128	0.260422	0.229039	0.017739	0.72003	0.000914437	0.209658					20220223_NeomaMSMS_SrF_LA_Chicago_Run1_RbSr_export_processed
157	BB_74	20220223_NeomaMSMS_SrF_LA_Chicago_Run1_RbSr_export_processed	9.30189e+08	46970.1	53090.1	1146.56	0.319718	0.0371572	0.720653	0.000891906	0.739171	0.268997	0.0363372	0.721599	0.000977263	0.621124					20220223_NeomaMSMS_SrF_LA_Chicago_Run1_RbSr_export_processed
158	BB_75	20220223_NeomaMSMS_SrF_LA_Chicago_Run1_RbSr_export_processed	1.11265e+09	47022.8	52800.7	1097.81	0.26119	0.0285647	0.719172	0.000943753	0.335524	0.219754	0.0283996	0.720116	0.00102461	0.301636					20220223_NeomaMSMS_SrF_LA_Chicago_Run1_RbSr_export_processed
159	BB_76	20220223_NeomaMSMS_SrF_LA_Chicago_Run1_RbSr_export_processed	3.64679e+08	47784	53178	1163.13	0.587569	0.0566526	0.727125	0.00155719	0.117517	0.494354	0.0585711	0.728079	0.00160982	0.120541					20220223_NeomaMSMS_SrF_LA_Chicago_Run1_RbSr_export_processed
160	BB_77	20220223_NeomaMSMS_SrF_LA_Chicago_Run1_RbSr_export_processed	3.77128e+08	47749.9	53015.9	1155.63	0.690106	0.0760152	0.729448	0.00330912	0.740003	0.580624	0.0754231	0.730406	0.00333772	0.635251					20220223_NeomaMSMS_SrF_LA_Chicago_Run1_RbSr_export_processed
161	BB_78	20220223_NeomaMSMS_SrF_LA_Chicago_Run1_RbSr_export_processed	3.59839e+08	47331	53047.9	1153.75	0.912009	1.00561	0.729953	0.0112514	0.978995	0.767324	0.84772	0.730911	0.0112734	0.9769					20220223_NeomaMSMS_SrF_LA_Chicago_Run1_RbSr_export_processed
164	BB_79	20220223_NeomaMSMS_SrF_LA_Chicago_Run1_RbSr_export_processed	3.08698e+08	47679.7	53569.5	1181.56	0.400677	0.0347552	0.724895	0.00130673	0.458997	0.342705	0.0362962	0.726184	0.0014153	0.385589					20220223_NeomaMSMS_SrF_LA_Chicago_Run1_RbSr_export_processed
165	BB_80	20220223_NeomaMSMS_SrF_LA_Chicago_Run1_RbSr_export_processed	2.74628e+08	47154.1	53702.6	1186.25	1.62014	1.34157	0.743111	0.0191856	0.95567	1.38573	1.15055	0.744433	0.0192276	0.953079					20220223_NeomaMSMS_SrF_LA_Chicago_Run1_RbSr_export_processed
166	BB_81	20220223_NeomaMSMS_SrF_LA_Chicago_Run1_RbSr_export_processed	1.29632e+09	47457.8	53860.7	1142.19	0.0650744	0.0154835	0.717365	0.00110419	0.497064	0.0556592	0.0136684	0.71864	0.00122762	0.452595					20220223_NeomaMSMS_SrF_LA_Chicago_Run1_RbSr_export_processed
167	BB_82	20220223_NeomaMSMS_SrF_LA_Chicago_Run1_RbSr_export_processed	3.62834e+08	46608.2	53623.9	1148.44	0.978357	0.0610957	0.733366	0.00324119	0.865504	0.836804	0.072916	0.73467	0.00329226	0.631767					20220223_NeomaMSMS_SrF_LA_Chicago_Run1_RbSr_export_processed
168	BB_83	20220223_NeomaMSMS_SrF_LA_Chicago_Run1_RbSr_export_processed	4.70788e+08	47388.5	55255.6	1148.44	0.0727332	0.00505374	0.715904	0.00152926	0.488271	0.0622098	0.00574255	0.717177	0.00162151	0.384715					20220223_NeomaMSMS_SrF_LA_Chicago_Run1_RbSr_export_processed
171	BB_84	20220223_NeomaMSMS_SrF_LA_Chicago_Run1_RbSr_export_processed	7.28054e+08	47536.1	55551.8	1177.81	0.0550753	0.00216639	0.707324	0.000867212	0.18102	0.0459747	0.0035979	0.708537	0.000960993	0.0809641					20220223_NeomaMSMS_SrF_LA_Chicago_Run1_RbSr_export_processed
172	BB_85	20220223_NeomaMSMS_SrF_LA_Chicago_Run1_RbSr_export_processed	5.21068e+08	47501.3	55986.1	1184.69	0.0567334	0.00292734	0.709454	0.000979236	0.825857	0.0473589	0.00402954	0.710671	0.00106399	0.460649					20220223_NeomaMSMS_SrF_LA_Chicago_Run1_RbSr_export_processed
173	BB_86	20220223_NeomaMSMS_SrF_LA_Chicago_Run1_RbSr_export_processed	4.60755e+08	47969.7	56346	1185	0.0659889	0.00798979	0.713708	0.000357979	-0.19547	0.055085	0.00764014	0.714931	0.000548197	-0.1129					20220223_NeomaMSMS_SrF_LA_Chicago_Run1_RbSr_export_processed
174	BB_87	20220223_NeomaMSMS_SrF_LA_Chicago_Run1_RbSr_export_processed	4.81069e+08	48323.9	55803.3	1169.06	0.0558027	0.00566118	0.715413	0.000668719	-0.225803	0.0465819	0.00568017	0.71664	0.000788336	-0.160645					20220223_NeomaMSMS_SrF_LA_Chicago_Run1_RbSr_export_processed
175	BB_88	20220223_NeomaMSMS_SrF_LA_Chicago_Run1_RbSr_export_processed	4.06184e+08	48078.2	55255	1180.31	0.173163	0.0115631	0.719277	0.00210689	0.684112	0.14455	0.0137407	0.72051	0.00215147	0.470936					20220223_NeomaMSMS_SrF_LA_Chicago_Run1_RbSr_export_processed
178	BB_89	20220223_NeomaMSMS_SrF_LA_Chicago_Run1_RbSr_export_processed	6.21902e+08	48001.1	55791.9	1181.25	0.0562626	0.00516658	0.71161	0.00112424	0.506644	0.0463745	0.0053722	0.712561	0.00113639	0.382131					20220223_NeomaMSMS_SrF_LA_Chicago_Run1_RbSr_export_processed
181	FeldsparGlassI_1	20220223_NeomaMSMS_SrF_LA_Chicago_Run1_RbSr_export_processed	1.67238e+09				0.877521	0.0444897	0.703784	0.000378897	-0.0499086	0.733635	0.0612143	0.705216	0.000440126	0.221144	0.822339	Davidson et al. (2001)	0.704137	Davidson et al. (2001)	20220223_NeomaMSMS_SrF_LA_Chicago_Run1_RbSr_export_processed
182	FeldsparGlassI_2	20220223_NeomaMSMS_SrF_LA_Chicago_Run1_RbSr_export_processed	1.55206e+09				0.87517	0.0375671	0.703788	0.000342039	0.152104	0.73167	0.0577712	0.70522	0.000408694	0.350787	0.822339	Davidson et al. (2001)	0.704137	Davidson et al. (2001)	20220223_NeomaMSMS_SrF_LA_Chicago_Run1_RbSr_export_processed
183	FeldsparGlassI_3	20220223_NeomaMSMS_SrF_LA_Chicago_Run1_RbSr_export_processed	1.48501e+09				0.868997	0.0337222	0.704019	0.000755988	-0.3759	0.726509	0.0557931	0.705451	0.000789583	-0.0324081	0.822339	Davidson et al. (2001)	0.704137	Davidson et al. (2001)	20220223_NeomaMSMS_SrF_LA_Chicago_Run1_RbSr_export_processed
184	FeldsparGlassI_4	20220223_NeomaMSMS_SrF_LA_Chicago_Run1_RbSr_export_processed	1.60042e+09				0.87635	0.041104	0.704411	0.000541088	0.216138	0.732657	0.0594839	0.705843	0.000586191	0.306489	0.822339	Davidson et al. (2001)	0.704137	Davidson et al. (2001)	20220223_NeomaMSMS_SrF_LA_Chicago_Run1_RbSr_export_processed
185	FeldsparGlassI_5	20220223_NeomaMSMS_SrF_LA_Chicago_Run1_RbSr_export_processed	1.4161e+09				0.859573	0.027241	0.704628	0.000579549	0.526016	0.71863	0.0527892	0.706061	0.000622034	0.410861	0.822339	Davidson et al. (2001)	0.704137	Davidson et al. (2001)	20220223_NeomaMSMS_SrF_LA_Chicago_Run1_RbSr_export_processed
188	FeldsparGlassL2_1	20220223_NeomaMSMS_SrF_LA_Chicago_Run1_RbSr_export_processed	6.07701e+09				0.120969	0.00422932	0.704352	0.000267553	-0.0730009	0.101992	0.00916685	0.706092	0.000418348	-0.0848063	0.105502	Davidson et al. (2001)	0.704335	Davidson et al. (2001)	20220223_NeomaMSMS_SrF_LA_Chicago_Run1_RbSr_export_processed
189	FeldsparGlassL2_2	20220223_NeomaMSMS_SrF_LA_Chicago_Run1_RbSr_export_processed	6.32428e+09				0.11532	0.00611846	0.704344	0.000290101	0.0154901	0.0972292	0.0095615	0.706085	0.000433184	-0.0531736	0.105502	Davidson et al. (2001)	0.704335	Davidson et al. (2001)	20220223_NeomaMSMS_SrF_LA_Chicago_Run1_RbSr_export_processed
190	FeldsparGlassL2_3	20220223_NeomaMSMS_SrF_LA_Chicago_Run1_RbSr_export_processed	5.36081e+09				0.117614	0.00300364	0.704415	0.000367081	0.0284014	0.0991638	0.00859237	0.706156	0.000488375	-0.0528751	0.105502	Davidson et al. (2001)	0.704335	Davidson et al. (2001)	20220223_NeomaMSMS_SrF_LA_Chicago_Run1_RbSr_export_processed
191	FeldsparGlassL2_4	20220223_NeomaMSMS_SrF_LA_Chicago_Run1_RbSr_export_processed	6.10723e+09				0.119499	0.0056313	0.704642	0.000357396	0.357507	0.100753	0.00959878	0.706383	0.00048117	0.0770217	0.105502	Davidson et al. (2001)	0.704335	Davidson et al. (2001)	20220223_NeomaMSMS_SrF_LA_Chicago_Run1_RbSr_export_processed
192	FeldsparGlassL2_5	20220223_NeomaMSMS_SrF_LA_Chicago_Run1_RbSr_export_processed	5.9301e+09				0.117605	0.00570214	0.704449	0.00034083	0.14328	0.0991562	0.00951412	0.70619	0.000468875	-0.00291046	0.105502	Davidson et al. (2001)	0.704335	Davidson et al. (2001)	20220223_NeomaMSMS_SrF_LA_Chicago_Run1_RbSr_export_processed
3	FeldsparKrichBB_1	20220228_NeomaMSMS_SrF_LA_Chicago_Run2_RbSr_export_processed	3.06105e+08	55626	48389.4	1366.25	5.46051	0.325669	0.841097	0.00386384	0.287877	5.11134	0.416486	0.845267	0.00387064	0.212502					20220228_NeomaMSMS_SrF_LA_Chicago_Run2_RbSr_export_processed
4	FeldsparKrichBB_2	20220228_NeomaMSMS_SrF_LA_Chicago_Run2_RbSr_export_processed	1.72954e+08	55677.1	48297	1366.25	0.757484	0.130034	0.729869	0.00317535	0.495112	0.709047	0.127927	0.733488	0.00317977	0.473299					20220228_NeomaMSMS_SrF_LA_Chicago_Run2_RbSr_export_processed
5	FeldsparKrichBB_3	20220228_NeomaMSMS_SrF_LA_Chicago_Run2_RbSr_export_processed	5.12012e+08	55526.1	48291.4	1366.25	2.55646	1.21051	0.775633	0.0225317	0.983128	2.39299	1.14086	0.779478	0.0226416	0.976546					20220228_NeomaMSMS_SrF_LA_Chicago_Run2_RbSr_export_processed
6	FeldsparKrichBB_4	20220228_NeomaMSMS_SrF_LA_Chicago_Run2_RbSr_export_processed	2.63918e+08	56279.1	50551.1	1423.13	7.91557	0.380919	0.893322	0.00657275	0.726058	7.40941	0.544388	0.897751	0.00659715	0.476915					20220228_NeomaMSMS_SrF_LA_Chicago_Run2_RbSr_export_processed
7	FeldsparKrichBB_5	20220228_NeomaMSMS_SrF_LA_Chicago_Run2_RbSr_export_processed	2.88082e+08	56377.2	50617.1	1423.13	9.42229	0.578609	0.957193	0.0133087	0.825459	8.81979	0.730149	0.961938	0.01337	0.612885					20220228_NeomaMSMS_SrF_LA_Chicago_Run2_RbSr_export_processed
10	FeldsparKrichBB_6	20220228_NeomaMSMS_SrF_LA_Chicago_Run2_RbSr_export_processed	3.02015e+08	56441.4	50485	1423.13	8.61105	1.14074	0.948431	0.0385616	0.976481	8.01913	1.21972	0.95228	0.0387175	0.850145					20220228_NeomaMSMS_SrF_LA_Chicago_Run2_RbSr_export_processed
11	FeldsparKrichBB_7	20220228_NeomaMSMS_SrF_LA_Chicago_Run2_RbSr_export_processed	2.97268e+08	56520.6	50354.8	1423.13	7.98495	0.633602	0.909709	0.0126971	0.888194	7.43607	0.810558	0.913401	0.0127468	0.645256					20220228_NeomaMSMS_SrF_LA_Chicago_Run2_RbSr_export_processed
12	FeldsparKrichBB_8	20220228_NeomaMSMS_SrF_LA_Chicago_Run2_RbSr_export_processed	3.38072e+08	55041.8	52009.2	1383.44	4.98929	0.465104	0.800631	0.00521919	0.927517	4.64632	0.555143	0.803881	0.00523698	0.7214					20220228_NeomaMSMS_SrF_LA_Chicago_Run2_RbSr_export_processed
13	FeldsparKrichBB_9	20220228_NeomaMSMS_SrF_LA_Chicago_Run2_RbSr_export_processed	2.90446e+08	54972.9	52079.1	1383.44	0.218557	0.0159688	0.72386	0.0032286	-0.046895	0.203533	0.0212728	0.726798	0.00323722	-0.0373982					20220228_NeomaMSMS_SrF_LA_Chicago_Run2_RbSr_export_processed
14	FeldsparKrichBB_10	20220228_NeomaMSMS_SrF_LA_Chicago_Run2_RbSr_export_processed	2.63357e+08	53921.4	53582.6	1372.19	8.17022	0.691263	0.979522	0.0245954	0.977028	7.6086	0.858927	0.983497	0.0246941	0.731542					20220228_NeomaMSMS_SrF_LA_Chicago_Run2_RbSr_export_processed
17	FeldsparKrichBB_11	20220228_NeomaMSMS_SrF_LA_Chicago_Run2_RbSr_export_processed	2.36438e+08	54038	53573.8	1372.19	0.337954	0.0808992	0.729734	0.00247966	0.689393	0.316717	0.0794345	0.732465	0.00248133	0.658857					20220228_NeomaMSMS_SrF_LA_Chicago_Run2_RbSr_export_processed
18	FeldsparKrichBB_13	20220228_NeomaMSMS_SrF_LA_Chicago_Run2_RbSr_export_processed	4.84409e+08	49768.2	55238	1230.31	2.46633	0.598109	0.775726	0.010356	0.993419	2.31135	0.586609	0.77863	0.0103927	0.949145					20220228_NeomaMSMS_SrF_LA_Chicago_Run2_RbSr_export_processed
19	FeldsparKrichBB_14	20220228_NeomaMSMS_SrF_LA_Chicago_Run2_RbSr_export_processed	3.37963e+08	49728.4	55083.9	1230.31	0.302356	0.0216663	0.722299	0.00201561	0.0515021	0.283357	0.0293597	0.725003	0.00201397	0.0323956					20220228_NeomaMSMS_SrF_LA_Chicago_Run2_RbSr_export_processed
20	FeldsparKrichBB_15	20220228_NeomaMSMS_SrF_LA_Chicago_Run2_RbSr_export_processed	3.51783e+08	49433.5	55599.4	1218.13	2.88695	0.0730184	0.77117	0.00194337	0.226103	2.70554	0.213732	0.774056	0.00193978	0.0678747					20220228_NeomaMSMS_SrF_LA_Chicago_Run2_RbSr_export_processed
21	FeldsparKrichBB_16	20220228_NeomaMSMS_SrF_LA_Chicago_Run2_RbSr_export_processed	1.86775e+08	49470.9	55713.6	1218.13	1.51949	0.262046	0.74634	0.00440597	-0.585741	1.424	0.267707	0.749133	0.00441798	-0.53875					20220228_NeomaMSMS_SrF_LA_Chicago_Run2_RbSr_export_processed
24	FeldsparKrichBB_17	20220228_NeomaMSMS_SrF_LA_Chicago_Run2_RbSr_export_processed	3.49278e+08	49587.8	55822.5	1218.13	0.557055	0.213304	0.728827	0.00381676	0.950341	0.516796	0.201331	0.73167	0.00382997	0.929547					20220228_NeomaMSMS_SrF_LA_Chicago_Run2_RbSr_export_processed
25	FeldsparKrichBB_18	20220228_NeomaMSMS_SrF_LA_Chicago_Run2_RbSr_export_processed	4.48223e+08	49324.8	55870.3	1218.13	2.41462	0.127605	0.760165	0.00314648	0.913076	2.24012	0.199602	0.763131	0.00315654	0.514527					20220228_NeomaMSMS_SrF_LA_Chicago_Run2_RbSr_export_processed
26	FeldsparKrichBB_19	20220228_NeomaMSMS_SrF_LA_Chicago_Run2_RbSr_export_processed	5.91873e+08	49853.7	56155	1218.13	2.85714	0.537719	0.781041	0.00841048	0.901538	2.65066	0.533871	0.784089	0.00844242	0.837842					20220228_NeomaMSMS_SrF_LA_Chicago_Run2_RbSr_export_processed
27	FeldsparKrichBB_20	20220228_NeomaMSMS_SrF_LA_Chicago_Run2_RbSr_export_processed	4.31928e+08	49954.7	56136.4	1218.13	1.53281	0.392525	0.750629	0.00804016	0.951172	1.42203	0.378177	0.753557	0.00807068	0.912461					20220228_NeomaMSMS_SrF_LA_Chicago_Run2_RbSr_export_processed
28	FeldsparKrichBB_21	20220228_NeomaMSMS_SrF_LA_Chicago_Run2_RbSr_export_processed	5.29003e+08	46477.2	56319	1099.38	1.70624	0.411288	0.750151	0.00853726	0.946306	1.58293	0.398104	0.753078	0.00856977	0.903546					20220228_NeomaMSMS_SrF_LA_Chicago_Run2_RbSr_export_processed
31	FeldsparKrichBB_22	20220228_NeomaMSMS_SrF_LA_Chicago_Run2_RbSr_export_processed	4.38885e+08	46593.9	56363.2	1099.38	2.68645	0.230944	0.7712	0.00352789	0.95858	2.50465	0.270183	0.774221	0.00354688	0.726846					20220228_NeomaMSMS_SrF_LA_Chicago_Run2_RbSr_export_processed
32	FeldsparKrichBB_23	20220228_NeomaMSMS_SrF_LA_Chicago_Run2_RbSr_export_processed	6.29833e+08	46505.6	56414.5	1099.38	5.91832	0.560567	0.828515	0.00773267	0.82217	5.51781	0.63437	0.831761	0.00776568	0.660559					20220228_NeomaMSMS_SrF_LA_Chicago_Run2_RbSr_export_processed
33	FeldsparKrichBB_24	20220228_NeomaMSMS_SrF_LA_Chicago_Run2_RbSr_export_processed	1.625e+08	49525.6	59810.4	1288.13	2.63685	0.138704	0.787932	0.00797911	-0.225881	2.45841	0.205879	0.791018	0.00801276	-0.162787					20220228_NeomaMSMS_SrF_LA_Chicago_Run2_RbSr_export_processed
34	FeldsparKrichBB_25	20220228_NeomaMSMS_SrF_LA_Chicago_Run2_RbSr_export_processed	3.01872e+08	49513.2	59923.5	1288.13	8.4743	0.377847	0.904312	0.00547997	0.724119	7.90082	0.623828	0.907855	0.00550601	0.371461					20220228_NeomaMSMS_SrF_LA_Chicago_Run2_RbSr_export_processed
35	FeldsparKrichBB_26	20220228_NeomaMSMS_SrF_LA_Chicago_Run2_RbSr_export_processed	6.48271e+08	44439.1	55468.7	988.44	3.99782	0.294828	0.804235	0.0105003	0.941769	3.72728	0.366807	0.807386	0.0105433	0.691782					20220228_NeomaMSMS_SrF_LA_Chicago_Run2_RbSr_export_processed
38	FeldsparKrichBB_27	20220228_NeomaMSMS_SrF_LA_Chicago_Run2_RbSr_export_processed	7.68024e+07	45023.9	44574.8	930	26.3819	2.83026	1.24986	0.0176698	0.0898478	25.0058	2.96405	1.25451	0.0177344	0.0762831					20220228_NeomaMSMS_SrF_LA_Chicago_Run2_RbSr_export_processed
39	FeldsparKrichBB_28	20220228_NeomaMSMS_SrF_LA_Chicago_Run2_RbSr_export_processed	5.38642e+07	45149.2	44511.4	930	39.5091	1.1949	1.56414	0.0279362	0.331226	37.4482	2.20151	1.56995	0.028039	0.162365					20220228_NeomaMSMS_SrF_LA_Chicago_Run2_RbSr_export_processed
40	FeldsparKrichBB_29	20220228_NeomaMSMS_SrF_LA_Chicago_Run2_RbSr_export_processed	7.27073e+07	45238.6	44430.2	930	25.5643	1.07494	1.39585	0.019835	-0.228916	24.2308	1.59066	1.40104	0.0199076	-0.15569					20220228_NeomaMSMS_SrF_LA_Chicago_Run2_RbSr_export_processed
41	FeldsparKrichBB_30	20220228_NeomaMSMS_SrF_LA_Chicago_Run2_RbSr_export_processed	1.83992e+08	45278.5	44309.1	930	10.6047	0.676434	0.929295	0.0112312	0.815644	10.0515	0.817212	0.934624	0.0112946	0.631381					20220228_NeomaMSMS_SrF_LA_Chicago_Run2_RbSr_export_processed
42	FeldsparKrichBB_31	20220228_NeomaMSMS_SrF_LA_Chicago_Run2_RbSr_export_processed	4.95647e+08	46155.2	44256.7	930	2.16938	0.0669888	0.758836	0.00251152	0.46837	2.05622	0.121558	0.761658	0.00251798	0.201719					20220228_NeomaMSMS_SrF_LA_Chicago_Run2_RbSr_export_processed
43	FeldsparKrichBB_32	20220228_NeomaMSMS_SrF_LA_Chicago_Run2_RbSr_export_processed	4.62282e+08	51485.3	46492.7	1187.5	0.470395	0.419703	0.731252	0.00182017	0.901034	0.445859	0.411094	0.733971	0.00182298	0.856169					20220228_NeomaMSMS_SrF_LA_Chicago_Run2_RbSr_export_processed
4	SHiBs_6_1	20220228_NeomaMSMS_SrF_LA_Chicago_Run3_Sr_export_processed	7.88932e+07						0.69378	0.00449423				0.6956	0.00450835						20220228_NeomaMSMS_SrF_LA_Chicago_Run3_Sr_export_processed
5	SHiB4_5	20220228_NeomaMSMS_SrF_LA_Chicago_Run3_Sr_export_processed	8.99505e+07						0.702717	0.00314189				0.70456	0.00315356						20220228_NeomaMSMS_SrF_LA_Chicago_Run3_Sr_export_processed
6	SHiB4_4	20220228_NeomaMSMS_SrF_LA_Chicago_Run3_Sr_export_processed	9.9224e+07						0.704409	0.0027427				0.706256	0.00275383						20220228_NeomaMSMS_SrF_LA_Chicago_Run3_Sr_export_processed
7	SHiB4_3	20220228_NeomaMSMS_SrF_LA_Chicago_Run3_Sr_export_processed	1.08682e+08						0.696716	0.00276207				0.698543	0.00277314						20220228_NeomaMSMS_SrF_LA_Chicago_Run3_Sr_export_processed
8	SHiB4_2	20220228_NeomaMSMS_SrF_LA_Chicago_Run3_Sr_export_processed	1.16664e+08						0.699082	0.00270015				0.700915	0.00271117						20220228_NeomaMSMS_SrF_LA_Chicago_Run3_Sr_export_processed
9	SHiB5_3	20220228_NeomaMSMS_SrF_LA_Chicago_Run3_Sr_export_processed	9.95522e+07						0.70685	0.00233745				0.708703	0.00234823						20220228_NeomaMSMS_SrF_LA_Chicago_Run3_Sr_export_processed
10	ShiB5_2	20220228_NeomaMSMS_SrF_LA_Chicago_Run3_Sr_export_processed	4.52777e+07						0.692691	0.00639178				0.694508	0.00641018						20220228_NeomaMSMS_SrF_LA_Chicago_Run3_Sr_export_processed
3	MCG1_1.8	20220228_NeomaMSMS_SrF_LA_Chicago_Run4_Sr_export_processed	3.18071e+06						8.10266	0.119848				8.12588	0.120215						20220228_NeomaMSMS_SrF_LA_Chicago_Run4_Sr_export_processed
4	MCG1_1.14A	20220228_NeomaMSMS_SrF_LA_Chicago_Run4_Sr_export_processed	4.29727e+06						5.09772	0.257012				5.11233	0.257752						20220228_NeomaMSMS_SrF_LA_Chicago_Run4_Sr_export_processed
5	MCG1_1.14B	20220228_NeomaMSMS_SrF_LA_Chicago_Run4_Sr_export_processed	4.05782e+06						6.81067	0.289529				6.83018	0.290365						20220228_NeomaMSMS_SrF_LA_Chicago_Run4_Sr_export_processed
8	BC24F1.5_1	20220228_NeomaMSMS_SrF_LA_Chicago_Run4_Sr_export_processed	1.15446e+09	14721	56025.2	1349.69			0.70529	0.00032543				0.707053	0.000460931						20220228_NeomaMSMS_SrF_LA_Chicago_Run4_Sr_export_processed
9	BC24F1.5_3	20220228_NeomaMSMS_SrF_LA_Chicago_Run4_Sr_export_processed	1.16551e+09	14864	55989.4	1349.69			0.70536	0.000359891				0.707123	0.000486018						20220228_NeomaMSMS_SrF_LA_Chicago_Run4_Sr_export_processed
10	BC24F1.5_4	20220228_NeomaMSMS_SrF_LA_Chicago_Run4_Sr_export_processed	9.61281e+08	15034.4	55982	1349.69			0.705251	0.000381021				0.707013	0.000501911						20220228_NeomaMSMS_SrF_LA_Chicago_Run4_Sr_export_processed
11	BC24F1.5_5	20220228_NeomaMSMS_SrF_LA_Chicago_Run4_Sr_export_processed	9.78452e+08	15219.8	55923.8	1349.69			0.705752	0.000358633				0.707516	0.000485204						20220228_NeomaMSMS_SrF_LA_Chicago_Run4_Sr_export_processed
12	BC24F1.5_6	20220228_NeomaMSMS_SrF_LA_Chicago_Run4_Sr_export_processed	9.01953e+08	15370.8	55880.8	1349.69			0.705555	0.00041957				0.707318	0.000531999						20220228_NeomaMSMS_SrF_LA_Chicago_Run4_Sr_export_processed
15	BC24F1.5_7	20220228_NeomaMSMS_SrF_LA_Chicago_Run4_Sr_export_processed	9.88301e+08	15536.8	55852.8	1349.69			0.705545	0.000375464				0.707337	0.000523986						20220228_NeomaMSMS_SrF_LA_Chicago_Run4_Sr_export_processed
16	BC24F1.5_8	20220228_NeomaMSMS_SrF_LA_Chicago_Run4_Sr_export_processed	1.00995e+09	15674.6	55820.5	1349.69			0.705342	0.000393282				0.707133	0.00053689						20220228_NeomaMSMS_SrF_LA_Chicago_Run4_Sr_export_processed
17	BC24F1.5_9	20220228_NeomaMSMS_SrF_LA_Chicago_Run4_Sr_export_processed	7.60663e+07	79199.2	22143.5	1349.69			0.706932	0.00336118				0.708728	0.00338945						20220228_NeomaMSMS_SrF_LA_Chicago_Run4_Sr_export_processed
18	BC24F1.5_10	20220228_NeomaMSMS_SrF_LA_Chicago_Run4_Sr_export_processed	5.96668e+08	79268.2	22221.2	1349.69			0.705393	0.000524734				0.707184	0.000639969						20220228_NeomaMSMS_SrF_LA_Chicago_Run4_Sr_export_processed
19	BC24F1.5_11	20220228_NeomaMSMS_SrF_LA_Chicago_Run4_Sr_export_processed	8.14982e+08	79371.7	22333.3	1349.69			0.705971	0.000402449				0.707764	0.000543894						20220228_NeomaMSMS_SrF_LA_Chicago_Run4_Sr_export_processed
22	BC24F1.5_12	20220228_NeomaMSMS_SrF_LA_Chicago_Run4_Sr_export_processed	9.38774e+08	79451.4	22445.5	1349.69			0.705486	0.000457471				0.707381	0.000568736						20220228_NeomaMSMS_SrF_LA_Chicago_Run4_Sr_export_processed
23	BC24F1.5_13	20220228_NeomaMSMS_SrF_LA_Chicago_Run4_Sr_export_processed	9.73474e+08	79557	22542.5	1349.69			0.705887	0.000367565				0.707783	0.000499013						20220228_NeomaMSMS_SrF_LA_Chicago_Run4_Sr_export_processed
24	BC24F1.5_14	20220228_NeomaMSMS_SrF_LA_Chicago_Run4_Sr_export_processed	9.66812e+08	79656.2	22648.2	1349.69			0.705919	0.00036001				0.707815	0.000493455						20220228_NeomaMSMS_SrF_LA_Chicago_Run4_Sr_export_processed
25	BC24F1.5_15	20220228_NeomaMSMS_SrF_LA_Chicago_Run4_Sr_export_processed	7.45247e+08	79746.8	22725.8	1349.69			0.706134	0.000472317				0.708031	0.000580987						20220228_NeomaMSMS_SrF_LA_Chicago_Run4_Sr_export_processed
26	BC24F1.5_16	20220228_NeomaMSMS_SrF_LA_Chicago_Run4_Sr_export_processed	9.48082e+08	79835.2	22801.3	1349.69			0.705368	0.000461036				0.707262	0.000571589						20220228_NeomaMSMS_SrF_LA_Chicago_Run4_Sr_export_processed
29	BC24F1.5_17	20220228_NeomaMSMS_SrF_LA_Chicago_Run4_Sr_export_processed	9.13501e+08	79919.3	22878.9	1349.69			0.705968	0.000437111				0.707581	0.000594581						20220228_NeomaMSMS_SrF_LA_Chicago_Run4_Sr_export_processed
30	BC24F1.5_18	20220228_NeomaMSMS_SrF_LA_Chicago_Run4_Sr_export_processed	8.46e+08	79984.1	22982.5	1349.69			0.705664	0.000461935				0.707276	0.000613032						20220228_NeomaMSMS_SrF_LA_Chicago_Run4_Sr_export_processed
31	BC24F1.5_19	20220228_NeomaMSMS_SrF_LA_Chicago_Run4_Sr_export_processed	5.05605e+08	79799.9	21901.6	1349.69			0.705847	0.000632467				0.707459	0.000750583						20220228_NeomaMSMS_SrF_LA_Chicago_Run4_Sr_export_processed
32	BC24F1.5_20	20220228_NeomaMSMS_SrF_LA_Chicago_Run4_Sr_export_processed	9.09141e+08	79726.4	22056.2	1349.69			0.705714	0.000451157				0.707326	0.000604933						20220228_NeomaMSMS_SrF_LA_Chicago_Run4_Sr_export_processed
33	BC24F1.5_21	20220228_NeomaMSMS_SrF_LA_Chicago_Run4_Sr_export_processed	1.84499e+08	79668.5	22191.4	1349.69			0.705376	0.00159807				0.706987	0.00165131						20220228_NeomaMSMS_SrF_LA_Chicago_Run4_Sr_export_processed
36	BC24F1.5_22	20220228_NeomaMSMS_SrF_LA_Chicago_Run4_Sr_export_processed	1.72821e+08	79610.5	22284.2	1349.69			0.706592	0.00192931				0.708433	0.00197963						20220228_NeomaMSMS_SrF_LA_Chicago_Run4_Sr_export_processed
37	BC24F1.5_23	20220228_NeomaMSMS_SrF_LA_Chicago_Run4_Sr_export_processed	9.41717e+08	79378.5	22566.3	1349.69			0.705438	0.000357552				0.707276	0.000552463						20220228_NeomaMSMS_SrF_LA_Chicago_Run4_Sr_export_processed
38	BC24F1.5_24	20220228_NeomaMSMS_SrF_LA_Chicago_Run4_Sr_export_processed	9.40527e+08	79216.2	22686.1	1349.69			0.705386	0.000386495				0.707225	0.000571696						20220228_NeomaMSMS_SrF_LA_Chicago_Run4_Sr_export_processed
39	BC24F1.5_25	20220228_NeomaMSMS_SrF_LA_Chicago_Run4_Sr_export_processed	9.3625e+08	79108	22782.7	1349.69			0.705436	0.000393043				0.707274	0.000576188						20220228_NeomaMSMS_SrF_LA_Chicago_Run4_Sr_export_processed
40	BC24F1.5_26	20220228_NeomaMSMS_SrF_LA_Chicago_Run4_Sr_export_processed	8.86011e+08	78957.4	22906.6	1349.69			0.705637	0.000350173				0.707476	0.000547783						20220228_NeomaMSMS_SrF_LA_Chicago_Run4_Sr_export_processed
43	BC24F1.5_27	20220228_NeomaMSMS_SrF_LA_Chicago_Run4_Sr_export_processed	8.89002e+08	78818.3	23018.6	1349.69			0.705308	0.000365966				0.707334	0.000582754						20220228_NeomaMSMS_SrF_LA_Chicago_Run4_Sr_export_processed
44	BC24F1.5_28	20220228_NeomaMSMS_SrF_LA_Chicago_Run4_Sr_export_processed	7.60502e+08	78686.9	23076.6	1349.69			0.705177	0.000426001				0.707203	0.000622371						20220228_NeomaMSMS_SrF_LA_Chicago_Run4_Sr_export_processed
45	BC24F1.5_29	20220228_NeomaMSMS_SrF_LA_Chicago_Run4_Sr_export_processed	7.88499e+08	78551.6	23161.6	1349.69			0.705314	0.000461822				0.70734	0.000647619						20220228_NeomaMSMS_SrF_LA_Chicago_Run4_Sr_export_processed
Davidson, J., Tepley III, F., Palacz, Z., & Meffan-Main, S. (2001). Magma recharge, contamination and residence times revealed by in situ laser ablation isotopic analysis of feldspar in volcanic rocks. Earth and Planetary Science Letters, 184(2), 427-442.
Davidson, J., Charlier, B., Hora, J. M., & Perlroth, R. (2005). Mineral isochrons and isotopic fingerprinting: Pitfalls and promises. Geology, 33(1), 29-32.
Woodhead, J. D., & Hergt, J. M. (2001). Strontium, neodymium and lead isotope analyses of NIST glass certified reference materials: SRM 610, 612, 614. Geostandards Newsletter, 25(2‐3), 261-266.
Yang, Y.H., Wu, F.Y., Yang, J.H., Chew, D.M., Xie, L.W., Chu, Z.Y., Zhang, Y.B. and Huang, C. (2014). Sr and Nd isotopic compositions of apatite reference materials used in U–Th–Pb geochronology. Chemical Geology, 385, 35-55.

## Sheet: known_materials
				Normalized FG-H					Normalized SRM 610
Index		Label	Count integral 88Sr	87Rb/86Sr	±95% CI	87Sr/86Sr	±95% CI	rho	87Rb/86Sr	±95% CI	87Sr/86Sr	±95% CI	rho	Reference 87Rb/86Sr		Reference 87Sr/86Sr			File
6		SRM612_1	4.08759e+08								0.708443	0.0007881							20220223_NeomaMSMS_SrF_LA_NIST610_612_Durango_Sronly_export_processed						20220223_NeomaMSMS_SrF_LA_NIST610_612_Durango_Sronly_export_processed
7		SRM612_2	4.08652e+08								0.711447	0.00080122							20220223_NeomaMSMS_SrF_LA_NIST610_612_Durango_Sronly_export_processed						20220223_NeomaMSMS_SrF_LA_NIST610_612_Durango_Sronly_export_processed
8		SRM612_3	4.13586e+08								0.710476	0.00079046							20220223_NeomaMSMS_SrF_LA_NIST610_612_Durango_Sronly_export_processed						20220223_NeomaMSMS_SrF_LA_NIST610_612_Durango_Sronly_export_processed
9		SRM612_4	4.09163e+08								0.709732	0.00084728							20220223_NeomaMSMS_SrF_LA_NIST610_612_Durango_Sronly_export_processed						20220223_NeomaMSMS_SrF_LA_NIST610_612_Durango_Sronly_export_processed
10		SRM612_5	3.89594e+08								0.710299	0.00081475							20220223_NeomaMSMS_SrF_LA_NIST610_612_Durango_Sronly_export_processed						20220223_NeomaMSMS_SrF_LA_NIST610_612_Durango_Sronly_export_processed
6		SRM612_1	1039307160						1.20046	0.134144	0.711296	0.00113065							20220223_NeomaMSMS_SrF_LA_NIST_610_612_Durango_SrRb_export_processed						20220223_NeomaMSMS_SrF_LA_NIST_610_612_Durango_SrRb_export_processed
7		SRM612_2	8.84551e+08						1.15124	0.119061	0.711499	0.00147525							20220223_NeomaMSMS_SrF_LA_NIST_610_612_Durango_SrRb_export_processed						20220223_NeomaMSMS_SrF_LA_NIST_610_612_Durango_SrRb_export_processed
8		SRM612_3	1042001030						1.15567	0.118382	0.711502	0.00091061							20220223_NeomaMSMS_SrF_LA_NIST_610_612_Durango_SrRb_export_processed						20220223_NeomaMSMS_SrF_LA_NIST_610_612_Durango_SrRb_export_processed
9		SRM612_4	1055551644						1.17717	0.127544	0.710264	0.00034621							20220223_NeomaMSMS_SrF_LA_NIST_610_612_Durango_SrRb_export_processed						20220223_NeomaMSMS_SrF_LA_NIST_610_612_Durango_SrRb_export_processed
10		SRM612_5	1045989662						1.16676	4.7498e-06	0.710688	0.00091826							20220223_NeomaMSMS_SrF_LA_NIST_610_612_Durango_SrRb_export_processed						20220223_NeomaMSMS_SrF_LA_NIST_610_612_Durango_SrRb_export_processed
		Average SRM 612							1.17026	0.024418	0.710565	0.000692816		1.15766	Certificate of analysis	0.709063	Woodhead and Hergt (2001)
11		Durango_1	4338621288								0.70609	0.0001108							20220223_NeomaMSMS_SrF_LA_NIST610_612_Durango_Sronly_export_processed						20220223_NeomaMSMS_SrF_LA_NIST610_612_Durango_Sronly_export_processed
12		Durango_2	4480489550								0.706278	0.0001252							20220223_NeomaMSMS_SrF_LA_NIST610_612_Durango_Sronly_export_processed						20220223_NeomaMSMS_SrF_LA_NIST610_612_Durango_Sronly_export_processed
13		Durango_3	4629841027								0.706279	0.00011177							20220223_NeomaMSMS_SrF_LA_NIST610_612_Durango_Sronly_export_processed						20220223_NeomaMSMS_SrF_LA_NIST610_612_Durango_Sronly_export_processed
14		Durango_4	4556190736								0.706434	0.0001017							20220223_NeomaMSMS_SrF_LA_NIST610_612_Durango_Sronly_export_processed						20220223_NeomaMSMS_SrF_LA_NIST610_612_Durango_Sronly_export_processed
15		Durango_5	4831671748								0.706085	0.00011413							20220223_NeomaMSMS_SrF_LA_NIST610_612_Durango_Sronly_export_processed						20220223_NeomaMSMS_SrF_LA_NIST610_612_Durango_Sronly_export_processed
11		Durango_1	11012847024						-4.60501e-05	4.0841e-05	0.705429	0.00019667							20220223_NeomaMSMS_SrF_LA_NIST_610_612_Durango_SrRb_export_processed						20220223_NeomaMSMS_SrF_LA_NIST_610_612_Durango_SrRb_export_processed
12		Durango_2	10580335198						5.95535e-05	6.6205e-05	0.70549	0.00021239							20220223_NeomaMSMS_SrF_LA_NIST_610_612_Durango_SrRb_export_processed						20220223_NeomaMSMS_SrF_LA_NIST_610_612_Durango_SrRb_export_processed
13		Durango_3	9803358275						6.51151e-05	4.6119e-05	0.705361	0.00022008							20220223_NeomaMSMS_SrF_LA_NIST_610_612_Durango_SrRb_export_processed						20220223_NeomaMSMS_SrF_LA_NIST_610_612_Durango_SrRb_export_processed
14		Durango_4	8826602296						0.000212264	0.00011175	0.705452	0.00024176							20220223_NeomaMSMS_SrF_LA_NIST_610_612_Durango_SrRb_export_processed						20220223_NeomaMSMS_SrF_LA_NIST_610_612_Durango_SrRb_export_processed
15		Durango_5	9094536766						-4.60501e-05	0.00014601	0.705429	0.00018246							20220223_NeomaMSMS_SrF_LA_NIST_610_612_Durango_SrRb_export_processed						20220223_NeomaMSMS_SrF_LA_NIST_610_612_Durango_SrRb_export_processed
		Average Durango							4.89665e-05	0.000131838	0.705833	0.000310718		0		0.70633	Yang et al. (2014)
181		Feldspar Glass I_1	1.67238e+09	0.877521	0.0444897	0.703784	0.000378897	-0.0499086	0.733635	0.0612143	0.705216	0.000440126	0.221144						20220223_NeomaMSMS_SrF_LA_Chicago_Run1_RbSr_export_processed						20220223_NeomaMSMS_SrF_LA_Chicago_Run1_RbSr_export_processed
182		Feldspar Glass I_2	1.55206e+09	0.87517	0.0375671	0.703788	0.000342039	0.152104	0.73167	0.0577712	0.70522	0.000408694	0.350787						20220223_NeomaMSMS_SrF_LA_Chicago_Run1_RbSr_export_processed						20220223_NeomaMSMS_SrF_LA_Chicago_Run1_RbSr_export_processed
183		Feldspar Glass I_3	1.48501e+09	0.868997	0.0337222	0.704019	0.000755988	-0.3759	0.726509	0.0557931	0.705451	0.000789583	-0.0324081						20220223_NeomaMSMS_SrF_LA_Chicago_Run1_RbSr_export_processed						20220223_NeomaMSMS_SrF_LA_Chicago_Run1_RbSr_export_processed
184		Feldspar Glass I_4	1.60042e+09	0.87635	0.041104	0.704411	0.000541088	0.216138	0.732657	0.0594839	0.705843	0.000586191	0.306489						20220223_NeomaMSMS_SrF_LA_Chicago_Run1_RbSr_export_processed						20220223_NeomaMSMS_SrF_LA_Chicago_Run1_RbSr_export_processed
185		Feldspar Glass I_5	1.4161e+09	0.859573	0.027241	0.704628	0.000579549	0.526016	0.71863	0.0527892	0.706061	0.000622034	0.410861						20220223_NeomaMSMS_SrF_LA_Chicago_Run1_RbSr_export_processed						20220223_NeomaMSMS_SrF_LA_Chicago_Run1_RbSr_export_processed
		Average Feldspar Glass I		0.871522	0.00924542	0.704126	0.000470925		0.72862	0.00772947	0.705558	0.000471883		0.822339	Davidson et al. (2005)	0.704137	Davidson et al. (2001)
188		Feldspar Glass L2_1	6.07701e+09	0.120969	0.00422932	0.704352	0.000267553	-0.0730009	0.101992	0.00916685	0.706092	0.000418348	-0.0848063						20220223_NeomaMSMS_SrF_LA_Chicago_Run1_RbSr_export_processed						20220223_NeomaMSMS_SrF_LA_Chicago_Run1_RbSr_export_processed
189		Feldspar Glass L2_2	6.32428e+09	0.11532	0.00611846	0.704344	0.000290101	0.0154901	0.0972292	0.0095615	0.706085	0.000433184	-0.0531736						20220223_NeomaMSMS_SrF_LA_Chicago_Run1_RbSr_export_processed						20220223_NeomaMSMS_SrF_LA_Chicago_Run1_RbSr_export_processed
190		Feldspar Glass L2_3	5.36081e+09	0.117614	0.00300364	0.704415	0.000367081	0.0284014	0.0991638	0.00859237	0.706156	0.000488375	-0.0528751						20220223_NeomaMSMS_SrF_LA_Chicago_Run1_RbSr_export_processed						20220223_NeomaMSMS_SrF_LA_Chicago_Run1_RbSr_export_processed
191		Feldspar Glass L2_4	6.10723e+09	0.119499	0.0056313	0.704642	0.000357396	0.357507	0.100753	0.00959878	0.706383	0.00048117	0.0770217						20220223_NeomaMSMS_SrF_LA_Chicago_Run1_RbSr_export_processed						20220223_NeomaMSMS_SrF_LA_Chicago_Run1_RbSr_export_processed
192		Feldspar Glass L2_5	5.9301e+09	0.117605	0.00570214	0.704449	0.00034083	0.14328	0.0991562	0.00951412	0.70619	0.000468875	-0.00291046						20220223_NeomaMSMS_SrF_LA_Chicago_Run1_RbSr_export_processed						20220223_NeomaMSMS_SrF_LA_Chicago_Run1_RbSr_export_processed
		Average Feldspar Glass L2		0.118201	0.00265927	0.704441	0.000150183		0.0996589	0.0022421	0.706181	0.000150554		0.105502	Davidson et al. (2001)	0.704335	Davidson et al. (2001)
							Normalized SRM					Normalized FG-H
		Label	Reference 87Rb/86Sr		Reference 87Sr/86Sr		87Rb/86Sr	±95% CI	87Sr/86Sr	±95% CI		87Rb/86Sr	±95% CI	87Sr/86Sr	±95% CI
		Average SRM 612	1.15766	Certificate of analysis	0.709063	Woodhead and Hergt (2001)	1.17026	0.024418	0.710565	0.000692816
		Average Durango	0		0.70633	Yang et al. (2014)	4.89665e-05	0.000131838	0.705833	0.000310718
		Average Feldspar Glass I	0.822339	Davidson et al. (2001)	0.704137	Davidson et al. (2001)	0.72862	0.00772947	0.705558	0.000471883		0.871522	0.00924542	0.704126	0.000470925
		Average Feldspar Glass L2	0.105502	Davidson et al. (2001)	0.704335	Davidson et al. (2001)	0.0996589	0.0022421	0.706181	0.000150554		0.118201	0.00265927	0.704441	0.000150183
												0.703	0.703
												0.712	0.712
												0	0
												1.4	1.4
																		225
																		255

## Sheet: Hibonites
				Normalized FG-H		Normalized SRM 610
		Label	Count integral 88Sr	87Sr/86Sr	±95% CI	87Sr/86Sr	±95% CI			Index			File
	1	1-6-1	7.88932e+07	0.69378	0.00449423	0.6956	0.00450835			4	20220228_NeomaMSMS_SrF_LA_Chicago_Run3_Sr_export_processed		20220228_NeomaMSMS_SrF_LA_Chicago_Run3_Sr_export_processed
	2	1-4-5	8.99505e+07	0.702717	0.00314189	0.70456	0.00315356			5	20220228_NeomaMSMS_SrF_LA_Chicago_Run3_Sr_export_processed		20220228_NeomaMSMS_SrF_LA_Chicago_Run3_Sr_export_processed
	3	1-4-4	9.9224e+07	0.704409	0.0027427	0.706256	0.00275383			6	20220228_NeomaMSMS_SrF_LA_Chicago_Run3_Sr_export_processed		20220228_NeomaMSMS_SrF_LA_Chicago_Run3_Sr_export_processed
	4	1-4-3	1.08682e+08	0.696716	0.00276207	0.698543	0.00277314			7	20220228_NeomaMSMS_SrF_LA_Chicago_Run3_Sr_export_processed		20220228_NeomaMSMS_SrF_LA_Chicago_Run3_Sr_export_processed
	5	1-4-2	1.16664e+08	0.699082	0.00270015	0.700915	0.00271117			8	20220228_NeomaMSMS_SrF_LA_Chicago_Run3_Sr_export_processed		20220228_NeomaMSMS_SrF_LA_Chicago_Run3_Sr_export_processed
	6	1-5-3	9.95522e+07	0.70685	0.00233745	0.708703	0.00234823			9	20220228_NeomaMSMS_SrF_LA_Chicago_Run3_Sr_export_processed		20220228_NeomaMSMS_SrF_LA_Chicago_Run3_Sr_export_processed
	7	1-5-2	4.52777e+07	0.692691	0.00639178	0.694508	0.00641018			10	20220228_NeomaMSMS_SrF_LA_Chicago_Run3_Sr_export_processed		20220228_NeomaMSMS_SrF_LA_Chicago_Run3_Sr_export_processed
		Average		0.6999	0.0036	0.7017	0.0036
		The averages were calculated using the random effect model of IsoplotR.
		Gray et al. (1973) and Wasserburg et al. (1977) give estimates for 87Sr/86Sr at solar							1.01423
		system birth of 0.69876±0.00002 (ALL) and 0.69883±0.00002 (ADOR).							1.42297
			1
									0	0.69876	0.69883
									8	0.69876	0.69883
		87Sr/86Sr of ~0.69879 (0.69876 0.00002 for ALL (Gray, Papanastassiou,
		351 & Wasserburg 1973); 0.69883 0.00002 for ADOR (Wasserburg et al. 1977))

## Sheet: Shap_Granite
										Normalized FG-H					Normalized SRM 610
	Index	Label	Note		Count integral 88Sr	X(um)	Y(um)	Z(um)	Distance from 1st pt (mm)	87Rb/86Sr	±95% CI	87Sr/86Sr	±95% CI	rho	87Rb/86Sr	±95% CI	87Sr/86Sr	±95% CI	rho	Reference 87Rb/86Sr		Reference 87Sr/86Sr		File																Distance mm	87Rb/86Sr	87Sr/86Sr
	2	Megacryst_outerrim_1		20220223_NeomaMSMS_SrF_LA_Megacryst_Shap_Sr_export_processed	6.13697e+09												0.709837	0.000101314				0.710863	Davidson et al. (2005)	20220223_NeomaMSMS_SrF_LA_Megacryst_Shap_Sr_export_processed															Inner core 2=1-2 point	0.229576	1.22265	0.714819
	3	Megacryst_outerrim_2		20220223_NeomaMSMS_SrF_LA_Megacryst_Shap_Sr_export_processed	7.22185e+09												0.710066	0.000117817				0.710863	Davidson et al. (2005)	20220223_NeomaMSMS_SrF_LA_Megacryst_Shap_Sr_export_processed															Outer core =16th point	12.5292	1.45613	0.715535
	4	Megacryst_outerrim_3		20220223_NeomaMSMS_SrF_LA_Megacryst_Shap_Sr_export_processed	6.43456e+09												0.710543	0.00014322				0.710863	Davidson et al. (2005)	20220223_NeomaMSMS_SrF_LA_Megacryst_Shap_Sr_export_processed															Inner rim=18-19 point	14.3193	0.240306	0.708519
	6	Megacryst_outerrim_1		20220223_NeomaMSMS_SrF_LA_Megacryst_Shap_Sr_export_processed	2.99265e+09												0.710026	0.00018891				0.710863	Davidson et al. (2005)	20220223_NeomaMSMS_SrF_LA_Megacryst_Shap_Sr_export_processed															outer rim=21-22 point	15.3533	0.642509	0.710863
	7	Megacryst_outerrim_2		20220223_NeomaMSMS_SrF_LA_Megacryst_Shap_Sr_export_processed	4.7622e+09												0.709823	0.000178691				0.710863	Davidson et al. (2005)	20220223_NeomaMSMS_SrF_LA_Megacryst_Shap_Sr_export_processed
	8	Megacryst_outerrim_3		20220223_NeomaMSMS_SrF_LA_Megacryst_Shap_Sr_export_processed	1.9252e+09												0.709393	0.000247846				0.710863	Davidson et al. (2005)	20220223_NeomaMSMS_SrF_LA_Megacryst_Shap_Sr_export_processed
	9	Megacryst_outerrim_4		20220223_NeomaMSMS_SrF_LA_Megacryst_Shap_Sr_export_processed	5.52508e+09												0.710688	0.000239584				0.710863	Davidson et al. (2005)	20220223_NeomaMSMS_SrF_LA_Megacryst_Shap_Sr_export_processed
	11	Megacryst_innrerrim_10		20220223_NeomaMSMS_SrF_LA_Megacryst_Shap_Sr_export_processed	7.78582e+09												0.709981	0.000141046				0.708519	Davidson et al. (2005)	20220223_NeomaMSMS_SrF_LA_Megacryst_Shap_Sr_export_processed
	12	Megacryst_innrerrim_11		20220223_NeomaMSMS_SrF_LA_Megacryst_Shap_Sr_export_processed	6.82052e+09												0.709519	0.000115992				0.708519	Davidson et al. (2005)	20220223_NeomaMSMS_SrF_LA_Megacryst_Shap_Sr_export_processed
	13	Megacryst_innrerrim_12		20220223_NeomaMSMS_SrF_LA_Megacryst_Shap_Sr_export_processed	7.23234e+09												0.710271	0.000245342				0.708519	Davidson et al. (2005)	20220223_NeomaMSMS_SrF_LA_Megacryst_Shap_Sr_export_processed
	14	Megacryst_innrerrim_13		20220223_NeomaMSMS_SrF_LA_Megacryst_Shap_Sr_export_processed	9.10589e+09												0.709548	0.000100747				0.708519	Davidson et al. (2005)	20220223_NeomaMSMS_SrF_LA_Megacryst_Shap_Sr_export_processed																	1
	16	Megacryst_outercore_18		20220223_NeomaMSMS_SrF_LA_Megacryst_Shap_Sr_export_processed	7.69229e+09												0.714195	0.000110867				0.715535	Davidson et al. (2005)	20220223_NeomaMSMS_SrF_LA_Megacryst_Shap_Sr_export_processed											1.39789						2
	17	Megacryst_outercore_19		20220223_NeomaMSMS_SrF_LA_Megacryst_Shap_Sr_export_processed	7.41088e+09												0.714873	0.000125344				0.715535	Davidson et al. (2005)	20220223_NeomaMSMS_SrF_LA_Megacryst_Shap_Sr_export_processed																	3	1.1805
	18	Megacryst_outercore_20		20220223_NeomaMSMS_SrF_LA_Megacryst_Shap_Sr_export_processed	7.04856e+09												0.71564	0.000110896				0.715535	Davidson et al. (2005)	20220223_NeomaMSMS_SrF_LA_Megacryst_Shap_Sr_export_processed																	4	1.77391
	19	Megacryst_outercore_21		20220223_NeomaMSMS_SrF_LA_Megacryst_Shap_Sr_export_processed	6.56212e+09												0.719885	0.000104073				0.715535	Davidson et al. (2005)	20220223_NeomaMSMS_SrF_LA_Megacryst_Shap_Sr_export_processed																	5	2.53608
	21	Megacryst_innercore_26		20220223_NeomaMSMS_SrF_LA_Megacryst_Shap_Sr_export_processed	6.15153e+09												0.717581	0.000102792				0.714819	Davidson et al. (2005)	20220223_NeomaMSMS_SrF_LA_Megacryst_Shap_Sr_export_processed																	6	3.31873
	22	Megacryst_innercore_27		20220223_NeomaMSMS_SrF_LA_Megacryst_Shap_Sr_export_processed	6.50483e+09												0.718046	0.000110464				0.714819	Davidson et al. (2005)	20220223_NeomaMSMS_SrF_LA_Megacryst_Shap_Sr_export_processed																	7	3.98406
	23	Megacryst_innercore_28		20220223_NeomaMSMS_SrF_LA_Megacryst_Shap_Sr_export_processed	6.83448e+09												0.717054	9.40306e-05				0.714819	Davidson et al. (2005)	20220223_NeomaMSMS_SrF_LA_Megacryst_Shap_Sr_export_processed			SRM						FGH								8	4.79333
	24	Megacryst_innercore_29		20220223_NeomaMSMS_SrF_LA_Megacryst_Shap_Sr_export_processed	6.99084e+09												0.716036	0.000132103				0.714819	Davidson et al. (2005)	20220223_NeomaMSMS_SrF_LA_Megacryst_Shap_Sr_export_processed			1.21						1.39								9	5.60762
	2	Megacryst_outerrim_5		20220223_NeomaMSMS_SrF_LA_Megacryst_Shap_RbSr_export_processed	1.63498e+09										1.40507	0.26212	0.714717	0.00162963	0.363583	0.642509	Davidson et al. (2005)	0.710863	Davidson et al. (2005)	20220223_NeomaMSMS_SrF_LA_Megacryst_Shap_RbSr_export_processed			1.16122	0.216628	0.714717	0.00162963	0.363583										10	6.66129
	3	Megacryst_outerrim_6		20220223_NeomaMSMS_SrF_LA_Megacryst_Shap_RbSr_export_processed	9.49899e+09										0.578477	0.0653072	0.711709	0.000427134	0.226933	0.642509	Davidson et al. (2005)	0.710863	Davidson et al. (2005)	20220223_NeomaMSMS_SrF_LA_Megacryst_Shap_RbSr_export_processed			0.47808	0.0539729	0.711709	0.000427134	0.226933										11	7.60717
	4	Megacryst_outerrim_7		20220223_NeomaMSMS_SrF_LA_Megacryst_Shap_RbSr_export_processed	9.41117e+09										0.168651	0.0439701	0.709564	0.000138455	0.202419	0.642509	Davidson et al. (2005)	0.710863	Davidson et al. (2005)	20220223_NeomaMSMS_SrF_LA_Megacryst_Shap_RbSr_export_processed			0.139381	0.0363389	0.709564	0.000138455	0.202419										12	8.62224
	5	Megacryst_outerrim_8		20220223_NeomaMSMS_SrF_LA_Megacryst_Shap_RbSr_export_processed	8.66066e+09										0.46878	0.0647378	0.711057	0.000315997	0.70591	0.642509	Davidson et al. (2005)	0.710863	Davidson et al. (2005)	20220223_NeomaMSMS_SrF_LA_Megacryst_Shap_RbSr_export_processed			0.387422	0.0535023	0.711057	0.000315997	0.70591										13	9.6955
	7	Megacryst_innrerrim_14		20220223_NeomaMSMS_SrF_LA_Megacryst_Shap_RbSr_export_processed	8.26895e+09										0.285122	0.186839	0.710156	0.00102393	0.974478	0.240306	Davidson et al. (2005)	0.708519	Davidson et al. (2005)	20220223_NeomaMSMS_SrF_LA_Megacryst_Shap_RbSr_export_processed			0.235638	0.154413	0.710156	0.00102393	0.974478										14	10.6216
	8	Megacryst_innrerrim_15		20220223_NeomaMSMS_SrF_LA_Megacryst_Shap_RbSr_export_processed	9.10275e+09										0.292552	0.068287	0.710164	0.000321136	0.825296	0.240306	Davidson et al. (2005)	0.708519	Davidson et al. (2005)	20220223_NeomaMSMS_SrF_LA_Megacryst_Shap_RbSr_export_processed			0.241778	0.0564355	0.710164	0.000321136	0.825296										15	11.6385
	9	Megacryst_innrerrim_16		20220223_NeomaMSMS_SrF_LA_Megacryst_Shap_RbSr_export_processed	5.94065e+09										0.0562734	0.0207549	0.708988	0.000239321	0.781254	0.240306	Davidson et al. (2005)	0.708519	Davidson et al. (2005)	20220223_NeomaMSMS_SrF_LA_Megacryst_Shap_RbSr_export_processed			0.0465069	0.0171528	0.708988	0.000239321	0.781254										16
	10	Megacryst_innrerrim_17		20220223_NeomaMSMS_SrF_LA_Megacryst_Shap_RbSr_export_processed	1.25294e+10										0.0558054	0.00712032	0.708984	0.000142513	0.498516	0.240306	Davidson et al. (2005)	0.708519	Davidson et al. (2005)	20220223_NeomaMSMS_SrF_LA_Megacryst_Shap_RbSr_export_processed			0.0461202	0.00588456	0.708984	0.000142513	0.498516										17	13.2168
	12	Megacryst_outercore_22		20220223_NeomaMSMS_SrF_LA_Megacryst_Shap_RbSr_export_processed	7.089e+09										1.27979	0.114177	0.715001	0.000273347	0.273368	1.45613	Davidson et al. (2005)	0.715535	Davidson et al. (2005)	20220223_NeomaMSMS_SrF_LA_Megacryst_Shap_RbSr_export_processed			1.05768	0.0943612	0.715001	0.000273347	0.273368										18	14.0761	14.3193
	13	Megacryst_outercore_23		20220223_NeomaMSMS_SrF_LA_Megacryst_Shap_RbSr_export_processed	7.77215e+09										1.08789	0.102294	0.714064	0.000163273	0.51162	1.45613	Davidson et al. (2005)	0.715535	Davidson et al. (2005)	20220223_NeomaMSMS_SrF_LA_Megacryst_Shap_RbSr_export_processed			0.899086	0.0845402	0.714064	0.000163273	0.51162										19	14.5626
	14	Megacryst_outercore_24		20220223_NeomaMSMS_SrF_LA_Megacryst_Shap_RbSr_export_processed	5.36456e+09										1.31849	0.141762	0.715106	0.000392252	0.701091	1.45613	Davidson et al. (2005)	0.715535	Davidson et al. (2005)	20220223_NeomaMSMS_SrF_LA_Megacryst_Shap_RbSr_export_processed			1.08966	0.117159	0.715106	0.000392252	0.701091										20	14.8594
	15	Megacryst_outercore_25		20220223_NeomaMSMS_SrF_LA_Megacryst_Shap_RbSr_export_processed	6.79813e+09										1.12857	0.115789	0.714121	0.000193942	0.504967	1.45613	Davidson et al. (2005)	0.715535	Davidson et al. (2005)	20220223_NeomaMSMS_SrF_LA_Megacryst_Shap_RbSr_export_processed			0.932699	0.0956935	0.714121	0.000193942	0.504967										21	15.2226	15.3533
	17	Megacryst_innercore_30		20220223_NeomaMSMS_SrF_LA_Megacryst_Shap_RbSr_export_processed	7.03725e+09										1.34381	0.130546	0.715089	0.000162642	0.307921	1.33365	Davidson et al. (2005)	0.714819	Davidson et al. (2005)	20220223_NeomaMSMS_SrF_LA_Megacryst_Shap_RbSr_export_processed			1.11058	0.107889	0.715089	0.000162642	0.307921										22	15.484
	18	Megacryst_innercore_31		20220223_NeomaMSMS_SrF_LA_Megacryst_Shap_RbSr_export_processed	6.28969e+09										1.36599	0.200968	0.715339	0.000330099	0.772032	1.33365	Davidson et al. (2005)	0.714819	Davidson et al. (2005)	20220223_NeomaMSMS_SrF_LA_Megacryst_Shap_RbSr_export_processed			1.12892	0.166089	0.715339	0.000330099	0.772032										23	15.7326
	19	Megacryst_innercore_32		20220223_NeomaMSMS_SrF_LA_Megacryst_Shap_RbSr_export_processed	6.29035e+09										1.38363	0.149005	0.715246	0.000169781	0.298297	1.33365	Davidson et al. (2005)	0.714819	Davidson et al. (2005)	20220223_NeomaMSMS_SrF_LA_Megacryst_Shap_RbSr_export_processed			1.1435	0.123144	0.715246	0.000169781	0.298297										24	16.014
	20	Megacryst_innercore_33		20220223_NeomaMSMS_SrF_LA_Megacryst_Shap_RbSr_export_processed	6.4685e+09										1.22879	0.127855	0.714563	0.00028874	-0.0517248	1.33365	Davidson et al. (2005)	0.714819	Davidson et al. (2005)	20220223_NeomaMSMS_SrF_LA_Megacryst_Shap_RbSr_export_processed			1.01553	0.105666	0.714563	0.00028874	-0.0517248
1	3	Megacryst_traverse_1		20220223_NeomaMSMS_SrF_LA_Chicago_Run1_RbSr_export_processed	8.88294e+08	56940	20163.7	1431.25	0	1.9405	0.107726	0.71559	0.00081948	0.187575	1.77188	0.169526	0.716307	0.000805513	0.303417					20220223_NeomaMSMS_SrF_LA_Chicago_Run1_RbSr_export_processed			1.46437	0.140104	0.716307	0.000805513	0.303417		1.38817	0.0770637	0.71559	0.00081948	0.187575
2	4	Megacryst_traverse_2		20220223_NeomaMSMS_SrF_LA_Chicago_Run1_RbSr_export_processed	4.17024e+08	56535.4	20380.9	1431.25	0.459152	3.80612	0.55425	0.721437	0.00144646	0.783442	3.47539	0.57399	0.72216	0.00143945	0.757764					20220223_NeomaMSMS_SrF_LA_Chicago_Run1_RbSr_export_processed			2.87222	0.474372	0.72216	0.00143945	0.757764		2.72277	0.396491	0.721437	0.00144646	0.783442
3	5	Megacryst_traverse_3		20220223_NeomaMSMS_SrF_LA_Chicago_Run1_RbSr_export_processed	7.64204e+08	55926.4	20768.9	1431.25	1.1805	1.99115	0.202486	0.715579	0.00144496	0.214386	1.81813	0.23293	0.716297	0.00143807	0.251715					20220223_NeomaMSMS_SrF_LA_Chicago_Run1_RbSr_export_processed			1.50259	0.192504	0.716297	0.00143807	0.251715		1.4244	0.144852	0.715579	0.00144496	0.214386
4	6	Megacryst_traverse_4		20220223_NeomaMSMS_SrF_LA_Chicago_Run1_RbSr_export_processed	7.3568e+08	55390.8	21027.9	1431.25	1.77391	1.7815	0.145813	0.713738	0.000631563	0.402357	1.6267	0.183832	0.714454	0.000612987	0.514241					20220223_NeomaMSMS_SrF_LA_Chicago_Run1_RbSr_export_processed			1.34438	0.151927	0.714454	0.000612987	0.514241		1.27442	0.10431	0.713738	0.000631563	0.402357
5	7	Megacryst_traverse_5		20220223_NeomaMSMS_SrF_LA_Chicago_Run1_RbSr_export_processed	8.35912e+08	54725.6	21399.9	1431.25	2.53608	1.40416	0.132822	0.712576	0.000493123	0.211863	1.28215	0.157132	0.71329	0.000468846	0.429377					20220223_NeomaMSMS_SrF_LA_Chicago_Run1_RbSr_export_processed			1.05963	0.129862	0.71329	0.000468846	0.429377		1.00449	0.0950162	0.712576	0.000493123	0.211863
6	10	Megacryst_traverse_6		20220223_NeomaMSMS_SrF_LA_Chicago_Run1_RbSr_export_processed	7.10124e+08	54030.9	21761.1	1431.25	3.31873	1.66963	0.107695	0.714543	0.000875715	0.33504	1.48797	0.16178	0.715924	0.000922851	0.23973					20220223_NeomaMSMS_SrF_LA_Chicago_Run1_RbSr_export_processed			1.22973	0.133702	0.715924	0.000922851	0.23973		1.19439	0.0770411	0.714543	0.000875715	0.33504
7	11	Megacryst_traverse_7		20220223_NeomaMSMS_SrF_LA_Chicago_Run1_RbSr_export_processed	7.35549e+08	53400.3	21992.3	1431.25	3.98406	2.19299	0.211893	0.716252	0.000785682	0.591495	1.95439	0.254796	0.717637	0.000837786	0.458645					20220223_NeomaMSMS_SrF_LA_Chicago_Run1_RbSr_export_processed			1.6152	0.210575	0.717637	0.000837786	0.458645		1.56879	0.151581	0.716252	0.000785682	0.591495
8	12	Megacryst_traverse_8		20220223_NeomaMSMS_SrF_LA_Chicago_Run1_RbSr_export_processed	3.8068e+08	52725.1	22446.4	1431.25	4.79333	3.90726	0.723488	0.722843	0.00231105	0.341964	3.48214	0.713175	0.724241	0.00233352	0.317558					20220223_NeomaMSMS_SrF_LA_Chicago_Run1_RbSr_export_processed			2.8778	0.589401	0.724241	0.00233352	0.317558		2.79512	0.517558	0.722843	0.00231105	0.341964
9	13	Megacryst_traverse_10		20220223_NeomaMSMS_SrF_LA_Chicago_Run1_RbSr_export_processed	5.85004e+08	52007.1	22830.6	1431.25	5.60762	2.38339	0.113108	0.717684	0.0016505	-0.466283	2.12408	0.211479	0.719071	0.00167845	-0.188368					20220223_NeomaMSMS_SrF_LA_Chicago_Run1_RbSr_export_processed			1.75544	0.174776	0.719071	0.00167845	-0.188368		1.705	0.0809136	0.717684	0.0016505	-0.466283
10	14	Megacryst_traverse_11		20220223_NeomaMSMS_SrF_LA_Chicago_Run1_RbSr_export_processed	8.10439e+08	51145.3	23449.3	1431.25	6.66129	1.61934	0.0912909	0.714107	0.00109017	-0.140393	1.44315	0.150246	0.715488	0.00112906	-0.0302504					20220223_NeomaMSMS_SrF_LA_Chicago_Run1_RbSr_export_processed			1.19269	0.12417	0.715488	0.00112906	-0.0302504		1.15842	0.0653063	0.714107	0.00109017	-0.140393
11	17	Megacryst_traverse_12		20220223_NeomaMSMS_SrF_LA_Chicago_Run1_RbSr_export_processed	7.85147e+08	50372	24001.7	1431.25	7.60717	1.48761	0.147282	0.712532	0.00062374	0.318573	1.31062	0.17414	0.714096	0.000674404	0.153747					20220223_NeomaMSMS_SrF_LA_Chicago_Run1_RbSr_export_processed			1.08316	0.143918	0.714096	0.000674404	0.153747		1.06418	0.10536	0.712532	0.00062374	0.318573
12	18	Megacryst_traverse_13		20220223_NeomaMSMS_SrF_LA_Chicago_Run1_RbSr_export_processed	1.00575e+09	49532.3	24576.1	1431.25	8.62224	1.28821	0.180542	0.712089	0.000379854	0.330508	1.13495	0.188189	0.713652	0.000457059	0.154354					20220223_NeomaMSMS_SrF_LA_Chicago_Run1_RbSr_export_processed			0.937972	0.155528	0.713652	0.000457059	0.154354		0.92154	0.129154	0.712089	0.000379854	0.330508
13	19	Megacryst_traverse_14		20220223_NeomaMSMS_SrF_LA_Chicago_Run1_RbSr_export_processed	8.08156e+08	48560	25040.1	1431.25	9.6955	1.95135	0.102811	0.714841	0.0011118	0.725804	1.71919	0.177234	0.71641	0.00114281	0.311088					20220223_NeomaMSMS_SrF_LA_Chicago_Run1_RbSr_export_processed			1.42082	0.146474	0.71641	0.00114281	0.311088		1.39592	0.0735473	0.714841	0.0011118	0.725804
14	20	Megacryst_traverse_15		20220223_NeomaMSMS_SrF_LA_Chicago_Run1_RbSr_export_processed	6.87123e+08	47720.4	25437.9	1431.25	10.6216	1.98614	0.261457	0.714807	0.00138443	0.294994	1.74984	0.277676	0.716376	0.00141051	0.214099					20220223_NeomaMSMS_SrF_LA_Chicago_Run1_RbSr_export_processed			1.44615	0.229484	0.716376	0.00141051	0.214099		1.42082	0.187038	0.714807	0.00138443	0.294994
15	21	Megacryst_traverse_16		20220223_NeomaMSMS_SrF_LA_Chicago_Run1_RbSr_export_processed	6.36622e+08	46814.4	25901.9	1431.25	11.6385	2.69933	0.170447	0.718055	0.00130421	0.257662	2.37818	0.258764	0.719631	0.00133173	0.105454					20220223_NeomaMSMS_SrF_LA_Chicago_Run1_RbSr_export_processed			1.96544	0.213855	0.719631	0.00133173	0.105454		1.931	0.121932	0.718055	0.00130421	0.257662
16	24	Megacryst_traverse_17		20220223_NeomaMSMS_SrF_LA_Chicago_Run1_RbSr_export_processed	5.7895e+08	46041	26343.8	1431.25	12.5292	1.76921	0.07198	0.714044	0.0018446	0.4073	1.53858	0.147424	0.715391	0.00185376	0.141209					20220223_NeomaMSMS_SrF_LA_Chicago_Run1_RbSr_export_processed			1.27156	0.121838	0.715391	0.00185376	0.141209		1.26563	0.051492	0.714044	0.0018446	0.4073
17	25	Megacryst_traverse_18		20220223_NeomaMSMS_SrF_LA_Chicago_Run1_RbSr_export_processed	8.88403e+08	45387.3	26584	1431.25	13.2168	2.02141	0.139774	0.716661	0.000654392	0.179669	1.75791	0.195018	0.718014	0.000671572	0.0346632					20220223_NeomaMSMS_SrF_LA_Chicago_Run1_RbSr_export_processed			1.45281	0.161172	0.718014	0.000671572	0.0346632		1.44605	0.0999893	0.716661	0.000654392	0.179669
18	26	Megacryst_traverse_19		20220223_NeomaMSMS_SrF_LA_Chicago_Run1_RbSr_export_processed	3.82492e+09	44626.9	26984.6	1431.25	14.0761	0.247201	0.0484478	0.708517	0.000267285	0.694556	0.214977	0.0460754	0.709854	0.000303966	0.475113					20220223_NeomaMSMS_SrF_LA_Chicago_Run1_RbSr_export_processed			0.177667	0.0380788	0.709854	0.000303966	0.475113		0.176839	0.0346579	0.708517	0.000267285	0.694556
19	27	Megacryst_traverse_20		20220223_NeomaMSMS_SrF_LA_Chicago_Run1_RbSr_export_processed	9.9148e+08	44229.8	27271.5	1431.25	14.5626	0.0600648	0.0283464	0.706968	0.000749187	0.80914	0.0522349	0.0250643	0.708302	0.000764196	0.766684					20220223_NeomaMSMS_SrF_LA_Chicago_Run1_RbSr_export_processed			0.0431693	0.0207143	0.708302	0.000764196	0.766684		0.0429683	0.020278	0.706968	0.000749187	0.80914
20	28	Megacryst_traverse_21		20220223_NeomaMSMS_SrF_LA_Chicago_Run1_RbSr_export_processed	1.84537e+09	43999.6	27467.7	1431.25	14.8594	0.270472	0.0157398	0.708734	0.00055997	-0.179402	0.235214	0.024571	0.710072	0.000579179	-0.187734					20220223_NeomaMSMS_SrF_LA_Chicago_Run1_RbSr_export_processed			0.194392	0.0203066	0.710072	0.000579179	-0.187734		0.193486	0.0112597	0.708734	0.00055997	-0.179402
21	31	Megacryst_traverse_22		20220223_NeomaMSMS_SrF_LA_Chicago_Run1_RbSr_export_processed	4.43335e+08	43724	27717.8	1431.25	15.2226	0.326921	0.0673833	0.709339	0.00153562	0.351889	0.281941	0.0623499	0.710765	0.00154905	0.326168					20220223_NeomaMSMS_SrF_LA_Chicago_Run1_RbSr_export_processed			0.233009	0.0515288	0.710765	0.00154905	0.326168		0.233868	0.0482036	0.709339	0.00153562	0.351889
22	32	Megacryst_traverse_23		20220223_NeomaMSMS_SrF_LA_Chicago_Run1_RbSr_export_processed	1.10388e+09	43490.2	27835.6	1431.25	15.484	0.287655	0.0308347	0.708402	0.000854	0.126766	0.248078	0.0332019	0.709826	0.000874126	0.100519					20220223_NeomaMSMS_SrF_LA_Chicago_Run1_RbSr_export_processed			0.205023	0.0274396	0.709826	0.000874126	0.100519		0.205779	0.0220581	0.708402	0.000854	0.126766
23	33	Megacryst_traverse_24		20220223_NeomaMSMS_SrF_LA_Chicago_Run1_RbSr_export_processed	1.70569e+09	43290.8	27987.7	1431.25	15.7326	0.682833	0.206751	0.710871	0.00117703	0.839226	0.588884	0.184444	0.712299	0.00119291	0.802453					20220223_NeomaMSMS_SrF_LA_Chicago_Run1_RbSr_export_processed			0.486681	0.152433	0.712299	0.00119291	0.802453		0.488475	0.147903	0.710871	0.00117703	0.839226
24	34	Megacryst_traverse_25		20220223_NeomaMSMS_SrF_LA_Chicago_Run1_RbSr_export_processed	1.39098e+09	43062.9	28156.1	1431.25	16.014	0.497924	0.0700328	0.710222	0.000743344	0.735105	0.429416	0.0695125	0.711649	0.000766025	0.622109					20220223_NeomaMSMS_SrF_LA_Chicago_Run1_RbSr_export_processed			0.354889	0.0574484	0.711649	0.000766025	0.622109		0.356197	0.050099	0.710222	0.000743344	0.735105
25	35	Megacryst_traverse_26	Not in megacryst	20220223_NeomaMSMS_SrF_LA_Chicago_Run1_RbSr_export_processed	2.30566e+08	42610	28386.3	1431.25		10.2065	0.423507	0.748692	0.00503737	-0.256053	8.80219	0.794324	0.750196	0.00505101	-0.117348					20220223_NeomaMSMS_SrF_LA_Chicago_Run1_RbSr_export_processed			7.27453	0.656466	0.750196	0.00505101	-0.117348		7.30135	0.302962	0.748692	0.00503737	-0.256053
26	38	Megacryst_traverse_27	Not in megacryst	20220223_NeomaMSMS_SrF_LA_Chicago_Run1_RbSr_export_processed	5.92159e+08	42457.9	28656.2	1431.25		5.66948	1.45184	0.731701	0.00380313	0.918728	4.93756	1.32292	0.733263	0.00381141	0.883681					20220223_NeomaMSMS_SrF_LA_Chicago_Run1_RbSr_export_processed			4.08063	1.09332	0.733263	0.00381141	0.883681		4.05575	1.0386	0.731701	0.00380313	0.918728
	40	Megacryst_isochron_2		20220223_NeomaMSMS_SrF_LA_Chicago_Run1_RbSr_export_processed	1.01111e+08	50107.7	32462.9	1327.19		16.1485	6.36796	0.769957	0.0293081	0.961932	14.0638	5.65552	0.7716	0.0293706	0.943794					20220223_NeomaMSMS_SrF_LA_Chicago_Run1_RbSr_export_processed			11.623	4.67398	0.7716	0.0293706	0.943794		11.5521	4.55542	0.769957	0.0293081	0.961932
	41	Megacryst_isochron_3		20220223_NeomaMSMS_SrF_LA_Chicago_Run1_RbSr_export_processed	5.73898e+07	51285.2	32086.6	1327.19		223.238	29.3399	1.86434	0.114012	0.761774	194.419	29.793	1.86832	0.114255	0.654178					20220223_NeomaMSMS_SrF_LA_Chicago_Run1_RbSr_export_processed			160.676	24.6223	1.86832	0.114255	0.654178		159.697	20.9888	1.86434	0.114012	0.761774		X
	42	Megacryst_isochron_4		20220223_NeomaMSMS_SrF_LA_Chicago_Run1_RbSr_export_processed	4.70465e+08	52627.3	30704.8	1327.19		8.66805	7.36776	0.750721	0.0348531	0.995919	7.54902	6.44411	0.752323	0.0349275	0.991864					20220223_NeomaMSMS_SrF_LA_Chicago_Run1_RbSr_export_processed			6.23886	5.32571	0.752323	0.0349275	0.991864		6.20082	5.27064	0.750721	0.0348531	0.995919
	45	Megacryst_isochron_5		20220223_NeomaMSMS_SrF_LA_Chicago_Run1_RbSr_export_processed	2.98537e+07	44135.4	31231.6	1327.19		340.792	106.803	2.29134	0.488578	0.995163	304.907	98.9658	2.29719	0.489826	0.961091					20220223_NeomaMSMS_SrF_LA_Chicago_Run1_RbSr_export_processed			251.99	81.7899	2.29719	0.489826	0.961091		243.791	76.4034	2.29134	0.488578	0.995163		X
	46	Megacryst_isochron_6		20220223_NeomaMSMS_SrF_LA_Chicago_Run1_RbSr_export_processed	2.30578e+08	43738.5	31329	1327.19		10.7928	0.611556	0.745932	0.00278567	-0.268298	9.6563	0.982046	0.747835	0.00280806	-0.111407					20220223_NeomaMSMS_SrF_LA_Chicago_Run1_RbSr_export_processed			7.98041	0.811608	0.747835	0.00280806	-0.111407		7.72077	0.437486	0.745932	0.00278567	-0.268298
	48	Megacryst_isochron_8		20220223_NeomaMSMS_SrF_LA_Chicago_Run1_RbSr_export_processed	3.24717e+08	46902.4	32397.9	1327.19		21.9216	12.3893	0.821304	0.0551845	0.987552	19.6133	11.2078	0.8234	0.0553262	0.977062					20220223_NeomaMSMS_SrF_LA_Chicago_Run1_RbSr_export_processed			16.2093	9.26266	0.8234	0.0553262	0.977062		15.6819	8.86289	0.821304	0.0551845	0.987552
	53	Megacryst_isochron_11		20220223_NeomaMSMS_SrF_LA_Chicago_Run1_RbSr_export_processed	1.35907e+07	40373.9	26806.5	1327.19		892.26	94.644	4.85812	0.237824	0.778722	817.081	113.649	4.87111	0.238468	0.595415					20220223_NeomaMSMS_SrF_LA_Chicago_Run1_RbSr_export_processed			675.273	93.9244	4.87111	0.238468	0.595415		638.292	67.705	4.85812	0.237824	0.778722		X
	54	Megacryst_isochron_12		20220223_NeomaMSMS_SrF_LA_Chicago_Run1_RbSr_export_processed	2.34252e+07	40414.6	26464.1	1327.19		657.582	423.685	3.95381	1.68636	0.972295	602.176	391.751	3.96438	1.69087	0.96299					20220223_NeomaMSMS_SrF_LA_Chicago_Run1_RbSr_export_processed			497.666	323.761	3.96438	1.69087	0.96299		470.411	303.089	3.95381	1.68636	0.972295		X
	55	Megacryst_isochron_13		20220223_NeomaMSMS_SrF_LA_Chicago_Run1_RbSr_export_processed	3.80368e+07	40270.4	26708.5	1327.19		177.219	36.6855	2.10913	0.170145	0.752683	162.287	36.6304	2.11477	0.170602	0.690881					20220223_NeomaMSMS_SrF_LA_Chicago_Run1_RbSr_export_processed			134.121	30.273	2.11477	0.170602	0.690881		126.776	26.2435	2.10913	0.170145	0.752683		X
	56	Megacryst_isochron_14		20220223_NeomaMSMS_SrF_LA_Chicago_Run1_RbSr_export_processed	3.19113e+08	40292.7	27057.1	1327.19		8.06255	1.0642	0.737791	0.0042565	-0.654607	7.38322	1.17941	0.739764	0.00427779	-0.528048					20220223_NeomaMSMS_SrF_LA_Chicago_Run1_RbSr_export_processed			6.10184	0.974715	0.739764	0.00427779	-0.528048		5.76767	0.761295	0.737791	0.0042565	-0.654607
	59	Megacryst_isochron_15		20220223_NeomaMSMS_SrF_LA_Chicago_Run1_RbSr_export_processed	2.21604e+07	44375.5	31279.6	1327.19		570.357	182.437	3.39191	0.767065	0.931204	526.987	176.402	3.3991	0.768692	0.889946					20220223_NeomaMSMS_SrF_LA_Chicago_Run1_RbSr_export_processed			435.526	145.786	3.3991	0.768692	0.889946		408.013	130.509	3.39191	0.767065	0.931204		X
	60	Megacryst_isochron_16		20220223_NeomaMSMS_SrF_LA_Chicago_Run1_RbSr_export_processed	2.12019e+07	44476.5	31065.9	1327.19		579.018	371.31	3.38719	1.39977	0.987988	534.99	347.113	3.39437	1.40273	0.97653					20220223_NeomaMSMS_SrF_LA_Chicago_Run1_RbSr_export_processed			442.14	286.87	3.39437	1.40273	0.97653		414.21	265.623	3.38719	1.39977	0.987988		X
	61	Megacryst_isochron_17		20220223_NeomaMSMS_SrF_LA_Chicago_Run1_RbSr_export_processed	7.5086e+07	47948.1	30797.1	1327.19		22.3858	8.51201	0.791978	0.0344547	0.923346	20.6836	8.12522	0.793657	0.0345277	0.894255					20220223_NeomaMSMS_SrF_LA_Chicago_Run1_RbSr_export_processed			17.0939	6.71505	0.793657	0.0345277	0.894255		16.014	6.08919	0.791978	0.0344547	0.923346
	Davidson, J., Tepley III, F., Palacz, Z., & Meffan-Main, S. (2001). Magma recharge, contamination and residence times revealed by in situ laser ablation isotopic analysis of feldspar in volcanic rocks. Earth and Planetary Science Letters, 184(2), 427-442.
	Davidson, J., Charlier, B., Hora, J. M., & Perlroth, R. (2005). Mineral isochrons and isotopic fingerprinting: Pitfalls and promises. Geology, 33(1), 29-32.
	Woodhead, J. D., & Hergt, J. M. (2001). Strontium, neodymium and lead isotope analyses of NIST glass certified reference materials: SRM 610, 612, 614. Geostandards Newsletter, 25(2‐3), 261-266.
	Yang, Y.H., Wu, F.Y., Yang, J.H., Chew, D.M., Xie, L.W., Chu, Z.Y., Zhang, Y.B. and Huang, C. (2014). Sr and Nd isotopic compositions of apatite reference materials used in U–Th–Pb geochronology. Chemical Geology, 385, 35-55.
	47	Megacryst_isochron_7		20220223_NeomaMSMS_SrF_LA_Chicago_Run1_RbSr_export_processed	106205	43187.6	30822.3	1327.19		0.789353	4.30276	#VALUE!	#VALUE!	#VALUE!	0.706235	3.85015	#VALUE!	#VALUE!	#VALUE!					20220223_NeomaMSMS_SrF_LA_Chicago_Run1_RbSr_export_processed
	49	Megacryst_isochron_9		20220223_NeomaMSMS_SrF_LA_Chicago_Run1_RbSr_export_processed	307948	42131.7	28562.3	1327.19		0.426776	0.311091	#VALUE!	#VALUE!	#VALUE!	0.381837	0.280196	#VALUE!	#VALUE!	#VALUE!					20220223_NeomaMSMS_SrF_LA_Chicago_Run1_RbSr_export_processed
	52	Megacryst_isochron_10		20220223_NeomaMSMS_SrF_LA_Chicago_Run1_RbSr_export_processed	580336	41715.4	27929.5	1327.19		0.0545208	0.122763	0.322847	0.446041	0.685642	0.049927	0.112509	0.32371	0.447234	0.685098					20220223_NeomaMSMS_SrF_LA_Chicago_Run1_RbSr_export_processed
	39	Megacryst_isochron_1		20220223_NeomaMSMS_SrF_LA_Chicago_Run1_RbSr_export_processed	1.74907e+07	47948.1	30658.5	1327.19		5.89896	1.09275	0.705802	0.0246135	0.829682	5.13742	1.03421	0.707308	0.024666	0.764592					20220223_NeomaMSMS_SrF_LA_Chicago_Run1_RbSr_export_processed
						Distance to the first inner point (um)
	Index	Label		x (um)	y (um)	Method 1	Method 2	87Sr/86Sr		±
	3	Megacryst_traverse_1		56940	20163.7	0	0	0.716307		0.000805513
	4	Megacryst_traverse_2		56535.4	20380.9	459.152	485.025	0.72216		0.00143945
	5	Megacryst_traverse_3		55926.4	20768.9	1180.5	1327.44	0.716297		0.00143807
	6	Megacryst_traverse_4		55390.8	21027.9	1773.91	1914.57	0.714454		0.000612987
	7	Megacryst_traverse_5		54725.6	21399.9	2536.08	2782.51	0.71329		0.000468846
	10	Megacryst_traverse_6		54030.9	21761.1	3318.73	3599.4	0.715924		0.000922851
	11	Megacryst_traverse_7		53400.3	21992.3	3984.06	4390.75	0.717637		0.000837786
	12	Megacryst_traverse_8		52725.1	22446.4	4793.33	5258.69	0.724241		0.00233352
	13	Megacryst_traverse_10		52007.1	22830.6	5607.62	6152.16	0.719071		0.00167845
	14	Megacryst_traverse_11		51145.3	23449.3	6661.29	7326.43	0.715488		0.00112906
	17	Megacryst_traverse_12		50372	24001.7	7607.17	8347.54	0.714096		0.000674404
	18	Megacryst_traverse_13		49532.3	24576.1	8622.24	9470.75	0.713652		0.000457059
	19	Megacryst_traverse_14		48560	25040.1	9695.5	10619.5	0.71641		0.00114281
	20	Megacryst_traverse_15		47720.4	25437.9	10621.6	11666.1	0.716376		0.00141051
	21	Megacryst_traverse_16		46814.4	25901.9	11638.5	12789.3	0.719631		0.00133173
	24	Megacryst_traverse_17		46041	26343.8	12529.2	13708.3	0.715391		0.00185376
	25	Megacryst_traverse_18		45387.3	26584	13216.8	14474.2	0.718014		0.000671572
	26	Megacryst_traverse_19		44626.9	26984.6	14076.1	15393.2	0.709854		0.000303966
	27	Megacryst_traverse_20		44229.8	27271.5	14562.6	15929.2	0.708302		0.000764196
	28	Megacryst_traverse_21		43999.6	27467.7	14859.4	16261.1	0.710072		0.000579179
	31	Megacryst_traverse_22		43724	27717.8	15222.6	16644	0.710765		0.00154905
	32	Megacryst_traverse_23		43490.2	27835.6	15484	16848.2	0.709826		0.000874126
	33	Megacryst_traverse_24		43290.8	27987.7	15732.6	17180.1	0.712299		0.00119291
	34	Megacryst_traverse_25		43062.9	28156.1	16014	17537.5	0.711649		0.000766025
	35	Megacryst_traverse_26		42610	28386.3	16521.5	18022.5	0.750196		0.00505101
	38	Megacryst_traverse_27		42457.9	28656.2	16788.5	18405.4	0.733263		0.00381141
	Method 1:	Using the x and y coordination, and calcualted relative distance using the formula: d = sqrt((x1-x2)^2 + (y1-y2)^2)
	Method 2:	Directly measure the distance on the SEM image between different laser spots.
						1.21559
		Normalized SRM 610
		87Rb/86Sr	±95% CI	87Sr/86Sr	±95% CI	rho
		1.40507	0.26212	0.714717	0.00162963	0.363583
		0.578477	0.0653072	0.711709	0.000427134	0.226933
		0.168651	0.0439701	0.709564	0.000138455	0.202419
		0.46878	0.0647378	0.711057	0.000315997	0.70591
		0.285122	0.186839	0.710156	0.00102393	0.974478
		0.292552	0.068287	0.710164	0.000321136	0.825296
		0.0562734	0.0207549	0.708988	0.000239321	0.781254
		0.0558054	0.00712032	0.708984	0.000142513	0.498516
		1.27979	0.114177	0.715001	0.000273347	0.273368
		1.08789	0.102294	0.714064	0.000163273	0.51162
		1.31849	0.141762	0.715106	0.000392252	0.701091
		1.12857	0.115789	0.714121	0.000193942	0.504967
		1.34381	0.130546	0.715089	0.000162642	0.307921
		1.36599	0.200968	0.715339	0.000330099	0.772032
		1.38363	0.149005	0.715246	0.000169781	0.298297
		1.22879	0.127855	0.714563	0.00028874	-0.0517248
		1.77188	0.169526	0.716307	0.000805513	0.303417
		3.47539	0.57399	0.72216	0.00143945	0.757764
		1.81813	0.23293	0.716297	0.00143807	0.251715
		1.6267	0.183832	0.714454	0.000612987	0.514241
		1.28215	0.157132	0.71329	0.000468846	0.429377
		1.48797	0.16178	0.715924	0.000922851	0.23973
		1.95439	0.254796	0.717637	0.000837786	0.458645
		3.48214	0.713175	0.724241	0.00233352	0.317558
		2.12408	0.211479	0.719071	0.00167845	-0.188368
		1.44315	0.150246	0.715488	0.00112906	-0.0302504
		1.31062	0.17414	0.714096	0.000674404	0.153747
		1.13495	0.188189	0.713652	0.000457059	0.154354
		1.71919	0.177234	0.71641	0.00114281	0.311088
		1.74984	0.277676	0.716376	0.00141051	0.214099
		2.37818	0.258764	0.719631	0.00133173	0.105454
		1.53858	0.147424	0.715391	0.00185376	0.141209
		1.75791	0.195018	0.718014	0.000671572	0.0346632
		0.214977	0.0460754	0.709854	0.000303966	0.475113
		0.0522349	0.0250643	0.708302	0.000764196	0.766684
		0.235214	0.024571	0.710072	0.000579179	-0.187734
		0.281941	0.0623499	0.710765	0.00154905	0.326168
		0.248078	0.0332019	0.709826	0.000874126	0.100519
		0.588884	0.184444	0.712299	0.00119291	0.802453
		0.429416	0.0695125	0.711649	0.000766025	0.622109
		8.80219	0.794324	0.750196	0.00505101	-0.117348
		4.93756	1.32292	0.733263	0.00381141	0.883681
		9.6563	0.982046	0.747835	0.00280806	-0.111407
		7.38322	1.17941	0.739764	0.00427779	-0.528048

## Sheet: BlackBeauty
																																			T	500
																						1.43					1.21								Delta t	315360000	K
		K2O/CaO (wt%/wt%)										Normalized FG-H					Normalized SRM 610					Normalized FG-H+Shap granite isochron					Normalized SRM 610+shap granite isochron					(87Sr/86Sr-87Sr/86Sr0)/(87Rb/86Sr)					s
Index	Label	EDS analysis of LA pit	EDS map before LA	File name	87Rb/86Sr>1	Grain surface area (um^2)	Equivalent diameter (um)	Count integral 88Sr	X (um)	Y(mm)	Z(um)	87Rb/86Sr	±95% CI	87Sr/86Sr	±95% CI	rho	87Rb/86Sr	±95% CI	87Sr/86Sr	±95% CI	rho	87Rb/86Sr	±95% CI	87Sr/86Sr	±95% CI	rho	87Rb/86Sr	±95% CI	87Sr/86Sr	±95% CI	rho	Slope (only 87Rb/86Sr>1)	Model age (Ma)	±95% CI
62	BB_1	1.41297	1.76122	20220223_NeomaMSMS_SrF_LA_Chicago_Run1_RbSr_export_processed	Y	74820.9	308.65	4.29281e+08	45592	48685	995.63	4.75984	0.326157	0.805515	0.0140889	0.566326	4.3979	0.528307	0.807223	0.0141185	0.327153	3.32856	0.228082	0.805515	0.0140889	0.566326	3.63463	0.436618	0.807223	0.0141185	0.327153	0.0262319	1853.26	291.376		308.65
63	BB_2	0.361264	3.66515	20220223_NeomaMSMS_SrF_LA_Chicago_Run1_RbSr_export_processed	Y	74820.9	308.65	2.59988e+08	45544	48867	995.63	7.99201	1.71984	0.853064	0.0197928	0.983462	7.3843	1.74813	0.854873	0.0198345	0.895554	5.58882	1.20268	0.853064	0.0197928	0.983462	6.10273	1.44473	0.854873	0.0198345	0.895554	0.0234309	1657.65	212.726		308.65
66	BB_3	9.54098	1.54281	20220223_NeomaMSMS_SrF_LA_Chicago_Run1_RbSr_export_processed	Y	74820.9	308.65	2.85551e+08	45652	48780	995.63	9.9656	2.89946	0.880849	0.0214693	0.498484	9.18304	2.82851	0.882663	0.0215162	0.475202	6.96895	2.0276	0.880849	0.0214693	0.498484	7.58929	2.33761	0.882663	0.0215162	0.475202	0.0225031	1592.73	432.873		308.65
67	BB_4	0.0293378	0.040679	20220223_NeomaMSMS_SrF_LA_Chicago_Run1_RbSr_export_processed				1041136313	46703	48992	1071.56	0.0706096	0.00761491	0.708257	0.00066181	-0.546052	0.0650649	0.00961839	0.709715	0.00071772	-0.147202	0.0493774	0.00532511	0.708257	0.00066181	-0.546052	0.0537727	0.00794908	0.709715	0.00071772	-0.147202					0
68	BB_5	0.0338346	0.0275436	20220223_NeomaMSMS_SrF_LA_Chicago_Run1_RbSr_export_processed				3.25116e+08	46354	49129	1076.25	0.0660481	0.0455091	0.709427	0.00487163	0.579465	0.0608616	0.0423846	0.710888	0.0048894	0.579313	0.0461875	0.0318246	0.709427	0.00487163	0.579465	0.0502989	0.0350286	0.710888	0.0048894	0.579313					0
69	BB_6	0.0445026	0.0561624	20220223_NeomaMSMS_SrF_LA_Chicago_Run1_RbSr_export_processed				5.99199e+08	46390	49244	1021.25	0.081231	0.00471891	0.714665	0.00097463	0.0561955	0.0748522	0.00872827	0.716137	0.00101515	0.226707	0.0568049	0.00329994	0.714665	0.00097463	0.0561955	0.0618613	0.00721345	0.716137	0.00101515	0.226707					0
70	BB_7	0.0150646	0.100407	20220223_NeomaMSMS_SrF_LA_Chicago_Run1_RbSr_export_processed				6.96378e+08	46781	49266	1086.88	0.0741693	0.01004	0.713758	0.00246255	0.386403	0.068345	0.0115474	0.715228	0.00248307	0.36395	0.0518666	0.00702101	0.713758	0.00246255	0.386403	0.0564835	0.00954329	0.715228	0.00248307	0.36395					0
73	BB_8	0.0218712	0.0171436	20220223_NeomaMSMS_SrF_LA_Chicago_Run1_RbSr_export_processed				3.56875e+08	46625	49294	1093.13	0.08317	0.0213998	0.716883	0.00069994	-0.610386	0.075045	0.0205156	0.718356	0.00072033	-0.48586	0.0581609	0.0149649	0.716883	0.00069994	-0.610386	0.0620207	0.016955	0.718356	0.00072033	-0.48586					0
74	BB_9	0.0415184	0.096901	20220223_NeomaMSMS_SrF_LA_Chicago_Run1_RbSr_export_processed				414316547	46433	49353	1083.44	0.0943219	0.00801886	0.711586	0.00126361	0.221199	0.0851074	0.0106837	0.713049	0.00127664	0.238257	0.0659594	0.00560759	0.711586	0.00126361	0.221199	0.0703367	0.0088295	0.713049	0.00127664	0.238257					0					47
75	BB_10	0.0217606	0.0568982	20220223_NeomaMSMS_SrF_LA_Chicago_Run1_RbSr_export_processed				3.82958e+08	46332	49331	1054.69	0.0773355	0.0202273	0.712294	0.0011973	0.26633	0.0697804	0.0193558	0.713757	0.00121079	0.291678	0.0540807	0.014145	0.712294	0.0011973	0.26633	0.0576698	0.0159965	0.713757	0.00121079	0.291678					0
76	BB_11	0.0548589	0.0477233	20220223_NeomaMSMS_SrF_LA_Chicago_Run1_RbSr_export_processed				4.48635e+08	46482	49660	1083.75	0.0826773	0.00428439	0.716016	0.00105789	-0.451234	0.0746004	0.00790057	0.717487	0.00107266	-0.0909054	0.0578163	0.00299608	0.716016	0.00105789	-0.451234	0.0616532	0.0065294	0.717487	0.00107266	-0.0909054					0
77	BB_12	0.0588822	0.0708041	20220223_NeomaMSMS_SrF_LA_Chicago_Run1_RbSr_export_processed				814978249	46630	49435	1056.88	0.0612074	0.00567004	0.71107	0.00076799	0.126644	0.0552279	0.00722454	0.712531	0.0007866	0.227307	0.0428023	0.00396506	0.71107	0.00076799	0.126644	0.0456429	0.00597069	0.712531	0.0007866	0.227307					0
80	BB_13	0.0374396	0.0911243	20220223_NeomaMSMS_SrF_LA_Chicago_Run1_RbSr_export_processed				4.44204e+08	46486	48965	1077.19	0.137012	0.0195218	0.718506	0.00134083	-0.522105	0.123483	0.0208036	0.719696	0.00133581	-0.466189	0.0958126	0.0136516	0.718506	0.00134083	-0.522105	0.102052	0.017193	0.719696	0.00133581	-0.466189					0
81	BB_14	0.0253682	0.0551937	20220223_NeomaMSMS_SrF_LA_Chicago_Run1_RbSr_export_processed				368867505	46812	49110	1084.69	0.101056	0.0220016	0.715489	0.00226066	-0.255069	0.0910773	0.021453	0.716673	0.00226015	-0.245564	0.0706686	0.0153857	0.715489	0.00226066	-0.255069	0.0752705	0.0177298	0.716673	0.00226015	-0.245564					0
82	BB_15	0.0420054	0.0369153	20220223_NeomaMSMS_SrF_LA_Chicago_Run1_RbSr_export_processed				5.90691e+08	46393	49035	1048.13	0.0646299	0.0023501	0.71273	0.00090107	0.546415	0.0582481	0.00564863	0.71391	0.00089192	0.149943	0.0451958	0.00164343	0.71273	0.00090107	0.546415	0.0481389	0.00466829	0.71391	0.00089192	0.149943					0					936000000	cps on 88Sr
83	BB_16	0.0170732	0.0301638	20220223_NeomaMSMS_SrF_LA_Chicago_Run1_RbSr_export_processed				7.88218e+08	46538	49212	1078.44	0.0532251	0.00277204	0.711903	0.00107526	0.343252	0.0479694	0.00498385	0.713082	0.00106816	0.128821	0.0372203	0.00193849	0.711903	0.00107526	0.343252	0.0396441	0.00411888	0.713082	0.00106816	0.128821					0					3.78374e+11
84	BB_17	0.0107527	0.0653274	20220223_NeomaMSMS_SrF_LA_Chicago_Run1_RbSr_export_processed				5.95696e+08	46695	49143	1083.44	0.0661421	0.00745325	0.715119	0.00104616	0.729824	0.0596109	0.00859308	0.716303	0.00103868	0.542307	0.0462532	0.00521206	0.715119	0.00104616	0.729824	0.0492652	0.00710172	0.716303	0.00103868	0.542307					0					0.00247374
87	BB_18	0.108571	0.105844	20220223_NeomaMSMS_SrF_LA_Chicago_Run1_RbSr_export_processed				7.81198e+08	47401	49447	1115.63	0.0454604	0.00346723	0.702189	0.00087574	0.546418	0.0403442	0.00490004	0.703431	0.0009092	0.397545	0.0317905	0.00242464	0.702189	0.00087574	0.546418	0.0333423	0.00404962	0.703431	0.0009092	0.397545					0					0.247374
88	BB_19	0.0529462	0.096297	20220223_NeomaMSMS_SrF_LA_Chicago_Run1_RbSr_export_processed				7.12408e+08	47304	49687	1056.25	0.0463688	0.00097652	0.7046	0.00068998	-0.110867	0.0411504	0.00398502	0.705846	0.00073154	0.0811698	0.0324257	0.000682881	0.7046	0.00068998	-0.110867	0.0340086	0.0032934	0.705846	0.00073154	0.0811698					0
89	BB_20	0.0319749	0.0507383	20220223_NeomaMSMS_SrF_LA_Chicago_Run1_RbSr_export_processed				1012706590	47895	48606	1074.38	0.00758209	0.00034861	0.702403	0.00059162	-0.456273	0.00672879	0.00070728	0.703644	0.00063898	-0.0758175	0.00530216	0.000243783	0.702403	0.00059162	-0.456273	0.00556099	0.000584529	0.703644	0.00063898	-0.0758175					0
90	BB_21	0.021418	0.0280931	20220223_NeomaMSMS_SrF_LA_Chicago_Run1_RbSr_export_processed				8.93886e+08	47969	48791	1108.13	0.0101265	0.00235879	0.701479	0.00110497	0.855975	0.00898687	0.00225912	0.702719	0.00113233	0.801119	0.00708148	0.0016495	0.701479	0.00110497	0.855975	0.00742716	0.00186704	0.702719	0.00113233	0.801119					0
91	BB_22	0.0233645	0.044893	20220223_NeomaMSMS_SrF_LA_Chicago_Run1_RbSr_export_processed				7.4412e+08	48053	48492	1122.5	0.0159075	0.00043627	0.702342	0.00184665	0.282207	0.0141173	0.00138944	0.703584	0.00186526	0.117976	0.0111241	0.000305084	0.702342	0.00184665	0.282207	0.0116672	0.0011483	0.703584	0.00186526	0.117976					0
102	BB_29	0.0344828	0.0845524	20220223_NeomaMSMS_SrF_LA_Chicago_Run1_RbSr_export_processed				9.08689e+08	49086	48278	1147.19	0.0146079	0.00068678	0.702331	0.00077255	-0.258309	0.0131472	0.00121362	0.703638	0.00078109	-0.0410532	0.0102153	0.000480266	0.702331	0.00077255	-0.258309	0.0108655	0.00100299	0.703638	0.00078109	-0.0410532					0
103	BB_30	0.0363349	0.0562225	20220223_NeomaMSMS_SrF_LA_Chicago_Run1_RbSr_export_processed				7.08827e+08	48957	48404	1169.38	0.0206395	0.0013558	0.701151	0.00088257	-0.104197	0.0185756	0.00191482	0.702455	0.00089041	0.0041028	0.0144332	0.000948112	0.701151	0.00088257	-0.104197	0.0153518	0.0015825	0.702455	0.00089041	0.0041028					0
104	BB_31	0.0525088	0.0590863	20220223_NeomaMSMS_SrF_LA_Chicago_Run1_RbSr_export_processed				8.77195e+08	49152	48458	1169.38	0.0337827	0.00220101	0.702842	0.00116964	0.435293	0.0304046	0.00312379	0.70415	0.00117652	0.328245	0.0236242	0.00153917	0.702842	0.00116964	0.435293	0.0251278	0.00258164	0.70415	0.00117652	0.328245					0
105	BB_32	0.0732984	0.0840642	20220223_NeomaMSMS_SrF_LA_Chicago_Run1_RbSr_export_processed				6.83659e+08	49603	48218	1169.38	0.0597254	0.00627719	0.70444	0.00096792	0.513539	0.0537532	0.00708177	0.70575	0.00097543	0.45754	0.041766	0.00438964	0.70444	0.00096792	0.513539	0.0444242	0.0058527	0.70575	0.00097543	0.45754					0
108	BB_33	0.1398	0.210121	20220223_NeomaMSMS_SrF_LA_Chicago_Run1_RbSr_export_processed				743071215	49623	48389	1169.38	0.113781	0.00761106	0.705136	0.00087554	0.18964	0.0995528	0.0105452	0.706714	0.00095685	0.327988	0.0795672	0.00532242	0.705136	0.00087554	0.18964	0.082275	0.00871507	0.706714	0.00095685	0.327988					0
109	BB_34	0.206271	1.50256	20220223_NeomaMSMS_SrF_LA_Chicago_Run1_RbSr_export_processed				5.9402e+08	49761	48295	1169.38	0.205416	0.0453735	0.712334	0.00082286	0.165708	0.179729	0.0423551	0.713928	0.00091031	0.244836	0.143648	0.0317297	0.712334	0.00082286	0.165708	0.148536	0.0350042	0.713928	0.00091031	0.244836					0
110	BB_35	0.056	0.117907	20220223_NeomaMSMS_SrF_LA_Chicago_Run1_RbSr_export_processed				232928719	49950	48042	1196.56	0.161753	0.0283159	0.726973	0.00189918	0.786115	0.141526	0.0273663	0.7286	0.00194364	0.757609	0.113114	0.0198013	0.726973	0.00189918	0.786115	0.116963	0.0226168	0.7286	0.00194364	0.757609					0
111	BB_36	0.0411523	0.14341	20220223_NeomaMSMS_SrF_LA_Chicago_Run1_RbSr_export_processed				2.24025e+08	50076	47978	1203.44	0.177651	0.0195254	0.72922	0.00389341	-0.129517	0.155436	0.0213268	0.730852	0.00392202	-0.0607285	0.124231	0.0136541	0.72922	0.00389341	-0.129517	0.128459	0.0176255	0.730852	0.00392202	-0.0607285					0
112	BB_37	0.0213777	0.249066	20220223_NeomaMSMS_SrF_LA_Chicago_Run1_RbSr_export_processed				1.57797e+08	50227	47931	1192.19	0.161666	0.0194684	0.717554	0.00788581	-0.902108	0.141449	0.0206185	0.71916	0.00791299	-0.724868	0.113053	0.0136143	0.717554	0.00788581	-0.902108	0.1169	0.0170401	0.71916	0.00791299	-0.724868					0
115	BB_38	0.0439189	0.265867	20220223_NeomaMSMS_SrF_LA_Chicago_Run1_RbSr_export_processed				2.50994e+08	50071	48300	1203.75	0.15011	0.00861805	0.729179	0.00266069	0.520188	0.130527	0.0122188	0.731262	0.00269678	0.450571	0.104972	0.00602661	0.729179	0.00266069	0.520188	0.107874	0.0100982	0.731262	0.00269678	0.450571					0
116	BB_39	0.0334572	0.0509112	20220223_NeomaMSMS_SrF_LA_Chicago_Run1_RbSr_export_processed				1.50843e+08	50195	48391	1197.5	0.153834	0.00480002	0.71548	0.00749803	0.575415	0.133766	0.0107352	0.717524	0.00752922	0.278738	0.107577	0.00335666	0.71548	0.00749803	0.575415	0.11055	0.00887202	0.717524	0.00752922	0.278738					0
117	BB_40	0.135861	0.149538	20220223_NeomaMSMS_SrF_LA_Chicago_Run1_RbSr_export_processed				5.71844e+08	51068	47767	1232.81	0.120812	0.00539441	0.712369	0.00109052	0.400721	0.105051	0.00907386	0.714404	0.00115842	0.528101	0.0844838	0.00377231	0.712369	0.00109052	0.400721	0.0868193	0.00749906	0.714404	0.00115842	0.528101					0
118	BB_41	0	0.0244797	20220223_NeomaMSMS_SrF_LA_Chicago_Run1_RbSr_export_processed				1.92356e+08	50883	47530	1211.56	0.0627269	0.0113465	0.713964	0.0032984	-0.674915	0.0545439	0.0106587	0.716003	0.0033299	-0.569348	0.0438649	0.0079346	0.713964	0.0032984	-0.674915	0.0450776	0.00880884	0.716003	0.0033299	-0.569348					0
119	BB_42	0.112426	0.0515953	20220223_NeomaMSMS_SrF_LA_Chicago_Run1_RbSr_export_processed				1.29663e+08	51788	47426	1169.38	0.0878684	0.0248161	0.712025	0.00664703	0.387844	0.0764056	0.022306	0.714059	0.00667694	0.391646	0.0614465	0.0173539	0.712025	0.00664703	0.387844	0.0631451	0.0184347	0.714059	0.00667694	0.391646					0
122	BB_43	0.0576471	0.0563886	20220223_NeomaMSMS_SrF_LA_Chicago_Run1_RbSr_export_processed				9.9828e+08	52098	47451	1243.13	0.0275804	0.00077244	0.702847	0.00066462	-0.415275	0.0240191	0.00171038	0.704926	0.00066461	0.209268	0.019287	0.000540168	0.702847	0.00066462	-0.415275	0.0198505	0.00141354	0.704926	0.00066461	0.209268					0
123	BB_44	0.00226031	0.00281427	20220223_NeomaMSMS_SrF_LA_Chicago_Run1_RbSr_export_processed				1530458390	52487	47601	1284.69	0.00188269	0.00083657	0.708774	0.00163654	0.893356	0.00163959	0.00073642	0.710871	0.00164057	0.908418	0.00131657	0.000585014	0.708774	0.00163654	0.893356	0.00135503	0.000608612	0.710871	0.00164057	0.908418					0
124	BB_45	0	0.0898557	20220223_NeomaMSMS_SrF_LA_Chicago_Run1_RbSr_export_processed				1633573353	52457	47777	1278.44	0.00522316	0.00287017	0.708361	0.00052107	-0.251222	0.00454872	0.00251723	0.710456	0.00052005	-0.188855	0.00365256	0.00200711	0.708361	0.00052107	-0.251222	0.00375927	0.00208036	0.710456	0.00052005	-0.188855					0
125	BB_46	0.0681004	0.413125	20220223_NeomaMSMS_SrF_LA_Chicago_Run1_RbSr_export_processed				7.01177e+08	53570	50012	1352.5	0.0804806	0.00364187	0.710775	0.00118807	0.598661	0.0700885	0.00557813	0.712878	0.00119045	0.529174	0.0562801	0.00254676	0.710775	0.00118807	0.598661	0.0579243	0.00461002	0.712878	0.00119045	0.529174					0
126	BB_47		0.0761682	20220223_NeomaMSMS_SrF_LA_Chicago_Run1_RbSr_export_processed				5.24982e+08	53307	50094	1272.5	0.0148071	0.00467898	0.701065	0.00080073	0.551519	0.0128951	0.00416134	0.703139	0.00080147	0.609246	0.0103546	0.00327201	0.701065	0.00080073	0.551519	0.0106571	0.00343912	0.703139	0.00080147	0.609246					0
129	BB_48	0.0661376	0.128539	20220223_NeomaMSMS_SrF_LA_Chicago_Run1_RbSr_export_processed				3.81242e+08	53752	50186	1308.44	0.429698	0.0844757	0.732096	0.00267358	0.826338	0.371998	0.0791558	0.73386	0.00268921	0.786654	0.300488	0.0590739	0.732096	0.00267358	0.826338	0.307437	0.065418	0.73386	0.00268921	0.786654					0
130	BB_49	0.0643447	0.0366183	20220223_NeomaMSMS_SrF_LA_Chicago_Run1_RbSr_export_processed				7.583e+08	53223	50868	1349.69	0.0240431	0.00053978	0.702779	0.00062292	0.0603349	0.0208146	0.00175791	0.704472	0.00065984	0.269569	0.0168133	0.000377469	0.702779	0.00062292	0.0603349	0.0172021	0.00145282	0.704472	0.00065984	0.269569					0
131	BB_50	0.0465368	0.0377399	20220223_NeomaMSMS_SrF_LA_Chicago_Run1_RbSr_export_processed				8.31308e+08	52861	50965	1349.69	0.028643	0.00201794	0.702485	0.00094559	0.464855	0.0247969	0.00266979	0.704176	0.00097154	0.432233	0.0200301	0.00141115	0.702485	0.00094559	0.464855	0.0204933	0.00220644	0.704176	0.00097154	0.432233					0
132	BB_51	0.0560472	0.0286383	20220223_NeomaMSMS_SrF_LA_Chicago_Run1_RbSr_export_processed				8.37754e+08	53448	51118	1349.69	0.014488	0.00154826	0.700311	0.00107086	-0.546027	0.0125426	0.00168504	0.701998	0.00109427	-0.32997	0.0101315	0.0010827	0.700311	0.00107086	-0.546027	0.0103658	0.0013926	0.701998	0.00109427	-0.32997					0
133	BB_52	0.0236862	0.053476	20220223_NeomaMSMS_SrF_LA_Chicago_Run1_RbSr_export_processed				8.80405e+08	53323	51150	1349.69	0.0248884	0.00237134	0.701646	0.00082076	0.362673	0.0215464	0.00270034	0.703336	0.00084984	0.399813	0.0174045	0.00165828	0.701646	0.00082076	0.362673	0.017807	0.00223169	0.703336	0.00084984	0.399813					0
136	BB_53	0.0598469	0.0271419	20220223_NeomaMSMS_SrF_LA_Chicago_Run1_RbSr_export_processed				8.73159e+08	52905	51149	1349.69	0.370109	0.032059	0.711378	0.00167297	0.60064	0.315449	0.0386237	0.712058	0.00167877	0.429014	0.258817	0.0224189	0.711378	0.00167297	0.60064	0.260701	0.0319204	0.712058	0.00167877	0.429014					0
137	BB_54	0.0187416	0.0322878	20220223_NeomaMSMS_SrF_LA_Chicago_Run1_RbSr_export_processed				8.51269e+08	52990	51416	1349.69	0.026585	0.00827781	0.703813	0.00094445	0.170023	0.0226588	0.00732271	0.704486	0.0009526	0.16597	0.0185909	0.00578868	0.703813	0.00094445	0.170023	0.0187262	0.00605183	0.704486	0.0009526	0.16597					0
138	BB_55	0.165605	0.144988	20220223_NeomaMSMS_SrF_LA_Chicago_Run1_RbSr_export_processed				1.36889e+08	52233	48350	1278.13	0.147651	0.0482656	0.726927	0.0313882	-0.0140279	0.125845	0.0425545	0.727622	0.0314185	-0.0134588	0.103252	0.0337522	0.726927	0.0313882	-0.0140279	0.104004	0.035169	0.727622	0.0314185	-0.0134588					0
139	BB_56	0.0456853	0.0162653	20220223_NeomaMSMS_SrF_LA_Chicago_Run1_RbSr_export_processed				1.49466e+08	52097	48546	1280.94	0.0924847	0.0139246	0.709775	0.0127238	-0.137171	0.078826	0.0136888	0.710454	0.0127365	-0.118443	0.0646746	0.00973748	0.709775	0.0127238	-0.137171	0.0651455	0.0113131	0.710454	0.0127365	-0.118443					0
140	BB_57	0.0121141	0.0110434	20220223_NeomaMSMS_SrF_LA_Chicago_Run1_RbSr_export_processed				5.42219e+08	51662	49403	1265.63	0.00715024	0.00255931	0.706294	0.00095697	0.264994	0.00609425	0.00224418	0.706969	0.0009651	0.258608	0.00500017	0.00178973	0.706294	0.00095697	0.264994	0.00503657	0.00185469	0.706969	0.0009651	0.258608					0
143	BB_58	0.0138889	0.018124	20220223_NeomaMSMS_SrF_LA_Chicago_Run1_RbSr_export_processed				7.52514e+07	51547	49163	1262.81	0.0789902	0.0168734	0.704976	0.0122273	-0.629605	0.0699592	0.015748	0.705118	0.0122273	-0.598874	0.0552379	0.0117996	0.704976	0.0122273	-0.629605	0.0578175	0.0130149	0.705118	0.0122273	-0.598874					0
144	BB_59	0.0695574	0.108974	20220223_NeomaMSMS_SrF_LA_Chicago_Run1_RbSr_export_processed	Y	12499	126.152	2.68544e+08	51464	49312	1233.13	1.80439	0.114381	0.758621	0.00477664	0.360816	1.59809	0.152105	0.758773	0.00477001	0.232336	1.26181	0.079987	0.758621	0.00477664	0.360816	1.32074	0.125707	0.758773	0.00477001	0.232336	0.0355055	2497.12	304.887		126.152
145	BB_66	0.131349	0.305654	20220223_NeomaMSMS_SrF_LA_Chicago_Run1_RbSr_export_processed				4.2401e+08	51492	47377	1169.38	0.181106	0.0142887	0.724813	0.00208944	0.178344	0.1604	0.0170246	0.724959	0.00207398	0.117122	0.126647	0.00999209	0.724813	0.00208944	0.178344	0.132562	0.0140699	0.724959	0.00207398	0.117122					0
146	BB_67	0.10125	0.119788	20220223_NeomaMSMS_SrF_LA_Chicago_Run1_RbSr_export_processed				1048682562	47810	53397	1233.13	0.236119	0.0148876	0.718692	0.00071365	0.141381	0.209123	0.019857	0.718836	0.0006667	0.0437505	0.165118	0.0104109	0.718692	0.00071365	0.141381	0.172829	0.0164107	0.718836	0.0006667	0.0437505					0
147	BB_68	0.0871863	0.101458	20220223_NeomaMSMS_SrF_LA_Chicago_Run1_RbSr_export_processed				9.01314e+08	47616	53356	1233.13	0.247532	0.0338614	0.720684	0.00119068	0.295731	0.219232	0.0337886	0.720829	0.00116314	0.248652	0.173099	0.0236793	0.720684	0.00119068	0.295731	0.181183	0.0279244	0.720829	0.00116314	0.248652					0
150	BB_69	0.0322222	0.129035	20220223_NeomaMSMS_SrF_LA_Chicago_Run1_RbSr_export_processed				6.47828e+08	47464	53331	1233.13	0.370337	0.140224	0.721511	0.00288307	0.592165	0.322173	0.123993	0.721971	0.00287607	0.589987	0.258977	0.0980589	0.721511	0.00288307	0.592165	0.266259	0.102474	0.721971	0.00287607	0.589987					0
151	BB_70	0.0695915	0.0703153	20220223_NeomaMSMS_SrF_LA_Chicago_Run1_RbSr_export_processed				5.15881e+08	47340	53318	1226.25	0.455359	0.0616164	0.720889	0.00106854	-0.431978	0.396138	0.0601589	0.721349	0.00104518	-0.354673	0.318433	0.0430884	0.720889	0.00106854	-0.431978	0.327387	0.0497181	0.721349	0.00104518	-0.354673					0
152	BB_71	0.0917538	0.162076	20220223_NeomaMSMS_SrF_LA_Chicago_Run1_RbSr_export_processed				1104744530	46826	53259	1104.38	0.32905	0.0274497	0.717487	0.00077231	0.659233	0.286256	0.0309788	0.717945	0.0007395	0.608203	0.230105	0.0191956	0.717487	0.00077231	0.659233	0.236575	0.0256023	0.717945	0.0007395	0.608203					0
153	BB_72	0.23416	0.238168	20220223_NeomaMSMS_SrF_LA_Chicago_Run1_RbSr_export_processed				1186491899	46694	53245	1154.69	0.278734	0.0144331	0.716399	0.00051187	0.116286	0.242484	0.020907	0.716856	0.00046058	0.232913	0.194919	0.0100931	0.716399	0.00051187	0.116286	0.2004	0.0172785	0.716856	0.00046058	0.232913					0
154	BB_73	0.11976	0.101007	20220223_NeomaMSMS_SrF_LA_Chicago_Run1_RbSr_export_processed				8.42664e+08	46935	53197	1126.88	0.26328	0.00929263	0.719571	0.00094113	0.260422	0.229039	0.017739	0.72003	0.00091444	0.209658	0.184112	0.00649834	0.719571	0.00094113	0.260422	0.189289	0.0146603	0.72003	0.00091444	0.209658					0
157	BB_74	0.168354	0.126983	20220223_NeomaMSMS_SrF_LA_Chicago_Run1_RbSr_export_processed				9.30189e+08	46970	53090	1146.56	0.319718	0.0371572	0.720653	0.00089191	0.739171	0.268997	0.0363372	0.721599	0.00097726	0.621124	0.223579	0.0259841	0.720653	0.00089191	0.739171	0.222311	0.0300307	0.721599	0.00097726	0.621124					0
158	BB_75	0.138009	0.077672	20220223_NeomaMSMS_SrF_LA_Chicago_Run1_RbSr_export_processed				1112646494	47023	52801	1097.81	0.26119	0.0285647	0.719172	0.00094375	0.335524	0.219754	0.0283996	0.720116	0.00102461	0.301636	0.182651	0.0199753	0.719172	0.00094375	0.335524	0.181615	0.0234707	0.720116	0.00102461	0.301636					0
159	BB_76	0.0467033	0.0219463	20220223_NeomaMSMS_SrF_LA_Chicago_Run1_RbSr_export_processed				3.64679e+08	47784	53178	1163.13	0.587569	0.0566526	0.727125	0.00155719	0.117517	0.494354	0.0585711	0.728079	0.00160982	0.120541	0.410887	0.0396172	0.727125	0.00155719	0.117517	0.408557	0.0484059	0.728079	0.00160982	0.120541					0
160	BB_77	0.0862069	0.0551173	20220223_NeomaMSMS_SrF_LA_Chicago_Run1_RbSr_export_processed				3.77128e+08	47750	53016	1155.63	0.690106	0.0760152	0.729448	0.00330912	0.740003	0.580624	0.0754231	0.730406	0.00333772	0.635251	0.482591	0.0531575	0.729448	0.00330912	0.740003	0.479855	0.0623331	0.730406	0.00333772	0.635251					0
161	BB_78	0.05	0.0692007	20220223_NeomaMSMS_SrF_LA_Chicago_Run1_RbSr_export_processed				3.59839e+08	47331	53048	1153.75	0.912009	1.00561	0.729953	0.0112514	0.978995	0.767324	0.84772	0.730911	0.0112734	0.9769	0.637769	0.703221	0.729953	0.0112514	0.978995	0.634152	0.700595	0.730911	0.0112734	0.9769					0
164	BB_79	0.0237113	0.0665937	20220223_NeomaMSMS_SrF_LA_Chicago_Run1_RbSr_export_processed				3.08698e+08	47680	53569	1181.56	0.400677	0.0347552	0.724895	0.00130673	0.458997	0.342705	0.0362962	0.726184	0.0014153	0.385589	0.280194	0.0243043	0.724895	0.00130673	0.458997	0.283227	0.0299969	0.726184	0.0014153	0.385589					0
165	BB_80	0.0347448	0.027118	20220223_NeomaMSMS_SrF_LA_Chicago_Run1_RbSr_export_processed	Y	66170	290.259	2.74628e+08	47154	53703	1186.25	1.62014	1.34157	0.743111	0.0191856	0.95567	1.38573	1.15055	0.744433	0.0192276	0.953079	1.13296	0.938163	0.743111	0.0191856	0.95567	1.14523	0.950871	0.744433	0.0192276	0.953079	0.0284244	2006.01	645.177		290.259
166	BB_81	0.0947368	0.0599091	20220223_NeomaMSMS_SrF_LA_Chicago_Run1_RbSr_export_processed				1296320052	47458	53861	1142.19	0.0650744	0.0154835	0.717365	0.00110419	0.497064	0.0556592	0.0136684	0.71864	0.00122762	0.452595	0.0455066	0.0108276	0.717365	0.00110419	0.497064	0.0459993	0.0112962	0.71864	0.00122762	0.452595					0
167	BB_82	0.0328738	0.0504836	20220223_NeomaMSMS_SrF_LA_Chicago_Run1_RbSr_export_processed				362833977	46608	53624	1148.44	0.978357	0.0610957	0.733366	0.00324119	0.865504	0.836804	0.072916	0.73467	0.00329226	0.631767	0.684166	0.0427243	0.733366	0.00324119	0.865504	0.691574	0.0602612	0.73467	0.00329226	0.631767					0
168	BB_83	0.0216418	0.0369678	20220223_NeomaMSMS_SrF_LA_Chicago_Run1_RbSr_export_processed				4.70788e+08	47388	55256	1148.44	0.0727331	0.00505374	0.715904	0.00152926	0.488271	0.0622098	0.00574255	0.717177	0.00162151	0.384715	0.0508623	0.00353408	0.715904	0.00152926	0.488271	0.0514131	0.00474591	0.717177	0.00162151	0.384715					0
171	BB_84	0.0341805	0.0238144	20220223_NeomaMSMS_SrF_LA_Chicago_Run1_RbSr_export_processed				728053769	47536	55552	1177.81	0.0550753	0.00216639	0.707324	0.00086721	0.18102	0.0459747	0.0035979	0.708537	0.00096099	0.0809641	0.0385142	0.00151496	0.707324	0.00086721	0.18102	0.0379956	0.00297347	0.708537	0.00096099	0.0809641					0
172	BB_85	0.00965108	0.0853203	20220223_NeomaMSMS_SrF_LA_Chicago_Run1_RbSr_export_processed				5.21068e+08	47501	55986	1184.69	0.0567334	0.00292734	0.709454	0.00097924	0.825857	0.0473589	0.00402954	0.710671	0.00106399	0.460649	0.0396737	0.00204709	0.709454	0.00097924	0.825857	0.0391396	0.0033302	0.710671	0.00106399	0.460649					0
173	BB_86	0.044702	0.0577321	20220223_NeomaMSMS_SrF_LA_Chicago_Run1_RbSr_export_processed				4.60755e+08	47970	56346	1185	0.0659889	0.00798979	0.713708	0.00035798	-0.19547	0.055085	0.00764014	0.714931	0.0005482	-0.1129	0.0461461	0.00558727	0.713708	0.00035798	-0.19547	0.0455248	0.00631417	0.714931	0.0005482	-0.1129					0
174	BB_87	0.0113101	0.0376305	20220223_NeomaMSMS_SrF_LA_Chicago_Run1_RbSr_export_processed				4.81069e+08	48324	55803	1169.06	0.0558027	0.00566118	0.715414	0.00066872	-0.225803	0.0465819	0.00568017	0.71664	0.00078834	-0.160645	0.0390229	0.00395887	0.715414	0.00066872	-0.225803	0.0384975	0.00469436	0.71664	0.00078834	-0.160645					0
175	BB_88	0.0324022	0.101095	20220223_NeomaMSMS_SrF_LA_Chicago_Run1_RbSr_export_processed				4.06184e+08	48078	55255	1180.31	0.173163	0.0115631	0.719277	0.00210689	0.684112	0.14455	0.0137407	0.72051	0.00215147	0.470936	0.121093	0.00808606	0.719277	0.00210689	0.684112	0.119462	0.0113559	0.72051	0.00215147	0.470936					0
178	BB_89	0.0267857	0.103951	20220223_NeomaMSMS_SrF_LA_Chicago_Run1_RbSr_export_processed				6.21902e+08	48001	55792	1181.25	0.0562626	0.00516658	0.71161	0.00112424	0.506644	0.0463745	0.0053722	0.712561	0.00113639	0.382131	0.0393445	0.00361299	0.71161	0.00112424	0.506644	0.038326	0.00443983	0.712561	0.00113639	0.382131					0
3	FeldsparKrichBB_1	1.56025	1.8859	20220228_NeomaMSMS_SrF_LA_Chicago_Run2_RbSr_export_processed	Y	35996.6	214.085	3.06105e+08	55626	48389	1366.25	5.46051	0.325669	0.841097	0.00386384	0.287877	5.11134	0.416486	0.845267	0.00387064	0.212502	3.81854	0.227741	0.841097	0.00386384	0.287877	4.22425	0.344203	0.845267	0.00387064	0.212502	0.0315764	2225.03	179.064		214.085
4	FeldsparKrichBB_2	0.0127796	0.597651	20220228_NeomaMSMS_SrF_LA_Chicago_Run2_RbSr_export_processed				1.72954e+08	55677	48297	1366.25	0.757484	0.130034	0.729869	0.00317535	0.495112	0.709047	0.127927	0.733488	0.00317977	0.473299	0.529709	0.0909328	0.729869	0.00317535	0.495112	0.585989	0.105724	0.733488	0.00317977	0.473299					0
5	FeldsparKrichBB_3	1.72707	0.323446	20220228_NeomaMSMS_SrF_LA_Chicago_Run2_RbSr_export_processed	Y	35997	214.086	5.12012e+08	55526	48291	1366.25	2.55646	1.21051	0.775633	0.0225317	0.983128	2.39299	1.14086	0.779478	0.0226416	0.976546	1.78774	0.846507	0.775633	0.0225317	0.983128	1.97768	0.942862	0.779478	0.0226416	0.976546	0.0341807	2405.49	399.631		214.086
6	FeldsparKrichBB_4	2.66434	2.47633	20220228_NeomaMSMS_SrF_LA_Chicago_Run2_RbSr_export_processed	Y	106907	368.942	263917950	56279	50551	1423.13	7.91557	0.380919	0.893322	0.00657275	0.726058	7.40941	0.544388	0.897751	0.00659715	0.476915	5.53536	0.266377	0.893322	0.00657275	0.726058	6.12348	0.449907	0.897751	0.00659715	0.476915	0.0303538	2140.16	138.212		368.942
7	FeldsparKrichBB_5	6.8631	1.97087	20220228_NeomaMSMS_SrF_LA_Chicago_Run2_RbSr_export_processed	Y	106907	368.942	2.88082e+08	56377	50617	1423.13	9.42229	0.578609	0.957193	0.0133087	0.825459	8.81979	0.730149	0.961938	0.01337	0.612885	6.58901	0.404622	0.957193	0.0133087	0.825459	7.28908	0.603429	0.961938	0.01337	0.612885	0.0343058	2414.15	158.058		368.942
10	FeldsparKrichBB_6	4.93893	7.73581	20220228_NeomaMSMS_SrF_LA_Chicago_Run2_RbSr_export_processed	Y	106907	368.942	3.02015e+08	56441	50485	1423.13	8.61105	1.14074	0.948431	0.0385616	0.976481	8.01913	1.21972	0.95228	0.0387175	0.850145	6.02171	0.79772	0.948431	0.0385616	0.976481	6.62738	1.00803	0.95228	0.0387175	0.850145	0.0362738	2550.2	219.703		368.942
11	FeldsparKrichBB_7	5.69565	5.34957	20220228_NeomaMSMS_SrF_LA_Chicago_Run2_RbSr_export_processed	Y	106907	368.942	2.97268e+08	56521	50355	1423.13	7.98495	0.633602	0.909709	0.0126971	0.888194	7.43607	0.810558	0.913401	0.0127468	0.645256	5.58388	0.443078	0.909709	0.0126971	0.888194	6.14551	0.669883	0.913401	0.0127468	0.645256	0.0327916	2309.29	193.001		368.942
12	FeldsparKrichBB_8	2.28191	0.717256	20220228_NeomaMSMS_SrF_LA_Chicago_Run2_RbSr_export_processed	Y	8401.95	103.43	3.38072e+08	55042	52009	1383.44	4.98929	0.465104	0.800631	0.00521919	0.927517	4.64632	0.555143	0.803881	0.00523698	0.7214	3.48901	0.325247	0.800631	0.00521919	0.927517	3.83994	0.458796	0.803881	0.00523698	0.7214	0.0239589	1694.56	148.726		103.43
13	FeldsparKrichBB_9	0.0578406	0.697759	20220228_NeomaMSMS_SrF_LA_Chicago_Run2_RbSr_export_processed				290446184	54973	52079	1383.44	0.218557	0.0159688	0.72386	0.0032286	-0.046895	0.203533	0.0212728	0.726798	0.00323722	-0.0373982	0.152837	0.011167	0.72386	0.0032286	-0.046895	0.168209	0.0175808	0.726798	0.00323722	-0.0373982					0
14	FeldsparKrichBB_10	10.8934	2.08413	20220228_NeomaMSMS_SrF_LA_Chicago_Run2_RbSr_export_processed	Y	9652.99	110.863	2.63357e+08	53921	53583	1372.19	8.17022	0.691263	0.979522	0.0245954	0.977028	7.6086	0.858927	0.983497	0.0246941	0.731542	5.71344	0.483401	0.979522	0.0245954	0.977028	6.2881	0.709857	0.983497	0.0246941	0.731542	0.0431954	3026.66	234.315		110.863
17	FeldsparKrichBB_11	0.139693	6.14892	20220228_NeomaMSMS_SrF_LA_Chicago_Run2_RbSr_export_processed				2.36438e+08	54038	53574	1372.19	0.337954	0.0808992	0.729734	0.00247966	0.689393	0.316717	0.0794345	0.732465	0.00248133	0.658857	0.236331	0.0565729	0.729734	0.00247966	0.689393	0.26175	0.0656484	0.732465	0.00248133	0.658857					0
18	FeldsparKrichBB_13	0.686131	0.51016	20220228_NeomaMSMS_SrF_LA_Chicago_Run2_RbSr_export_processed	Y	24425	176.349	4.84409e+08	49768	55238	1230.31	2.46633	0.598109	0.775726	0.010356	0.993419	2.31135	0.586609	0.77863	0.0103927	0.949145	1.7247	0.418258	0.775726	0.010356	0.993419	1.9102	0.484801	0.77863	0.0103927	0.949145	0.0349438	2458.28	287.13		176.349
19	FeldsparKrichBB_14	0.0748899	0.447787	20220228_NeomaMSMS_SrF_LA_Chicago_Run2_RbSr_export_processed				3.37963e+08	49728	55084	1230.31	0.302356	0.0216663	0.722299	0.00201561	0.0515021	0.283357	0.0293597	0.725003	0.00201397	0.0323956	0.211438	0.0151512	0.722299	0.00201561	0.0515021	0.234179	0.0242642	0.725003	0.00201397	0.0323956					0
20	FeldsparKrichBB_15	2.75191	0.120945	20220228_NeomaMSMS_SrF_LA_Chicago_Run2_RbSr_export_processed	Y	39885.2	225.352	3.51783e+08	49434	55599	1218.13	2.88695	0.0730184	0.77117	0.00194337	0.226103	2.70554	0.213732	0.774056	0.00193978	0.0678747	2.01884	0.0510618	0.77117	0.00194337	0.226103	2.23598	0.176638	0.774056	0.00193978	0.0678747	0.027807	1963.02	162.818		225.352
21	FeldsparKrichBB_16	0.204868	2.48273	20220228_NeomaMSMS_SrF_LA_Chicago_Run2_RbSr_export_processed	Y	39885.2	225.352	1.86775e+08	49471	55714	1218.13	1.51949	0.262046	0.74634	0.00440597	-0.585741	1.424	0.267707	0.749133	0.00441798	-0.53875	1.06258	0.183249	0.74634	0.00440597	-0.585741	1.17686	0.221245	0.749133	0.00441798	-0.53875	0.0316545	2230.45	604.406		225.352
24	FeldsparKrichBB_17	0.0559322	1.2686	20220228_NeomaMSMS_SrF_LA_Chicago_Run2_RbSr_export_processed				3.49278e+08	49588	55822	1218.13	0.557055	0.213304	0.728827	0.00381676	0.950341	0.516796	0.201331	0.73167	0.00382997	0.929547	0.389549	0.149163	0.728827	0.00381676	0.950341	0.427104	0.166389	0.73167	0.00382997	0.929547					0
25	FeldsparKrichBB_18	1.05701	0.122516	20220228_NeomaMSMS_SrF_LA_Chicago_Run2_RbSr_export_processed	Y	10791	117.216	448223357	49325	55870	1218.13	2.41462	0.127605	0.760165	0.00314648	0.913076	2.24012	0.199602	0.763131	0.00315654	0.514527	1.68855	0.0892345	0.760165	0.00314648	0.913076	1.85134	0.16496	0.763131	0.00315654	0.514527	0.0276831	1954.4	152.461		117.216
26	FeldsparKrichBB_19	0.324427	1.53524	20220228_NeomaMSMS_SrF_LA_Chicago_Run2_RbSr_export_processed	Y	23398	172.601	5.91873e+08	49854	56155	1218.13	2.85714	0.537719	0.781041	0.00841048	0.901538	2.65066	0.533871	0.784089	0.00844242	0.837842	1.998	0.376027	0.781041	0.00841048	0.901538	2.19063	0.441216	0.784089	0.00844242	0.837842	0.0329626	2321.14	282.153		172.601
27	FeldsparKrichBB_20	0.317726	0.362091	20220228_NeomaMSMS_SrF_LA_Chicago_Run2_RbSr_export_processed	Y	23398	172.601	4.31928e+08	49955	56136	1218.13	1.53281	0.392525	0.750629	0.00804016	0.951172	1.42203	0.378177	0.753557	0.00807068	0.912461	1.07189	0.274493	0.750629	0.00804016	0.951172	1.17523	0.312543	0.753557	0.00807068	0.912461	0.0354629	2494.18	297.663		172.601
28	FeldsparKrichBB_21	2.06	0.66864	20220228_NeomaMSMS_SrF_LA_Chicago_Run2_RbSr_export_processed	Y	55418.6	265.633	5.29003e+08	46477	56319	1099.38	1.70624	0.411288	0.750151	0.00853726	0.946306	1.58293	0.398104	0.753078	0.00856977	0.903546	1.19318	0.287614	0.750151	0.00853726	0.946306	1.30821	0.329011	0.753078	0.00856977	0.903546	0.0314916	2219.15	242.92		265.633
31	FeldsparKrichBB_22	0.830428	1.28183	20220228_NeomaMSMS_SrF_LA_Chicago_Run2_RbSr_export_processed	Y	55418.6	265.633	4.38885e+08	46594	56363	1099.38	2.68645	0.230944	0.7712	0.00352789	0.95858	2.50465	0.270183	0.774221	0.00354688	0.726846	1.87864	0.1615	0.7712	0.00352789	0.95858	2.06996	0.223291	0.774221	0.00354688	0.726846	0.030117	2123.7	163.837		265.633
32	FeldsparKrichBB_23	1.45093	0.750186	20220228_NeomaMSMS_SrF_LA_Chicago_Run2_RbSr_export_processed	Y	55418.6	265.633	6.29833e+08	46506	56415	1099.38	5.91832	0.560566	0.828515	0.00773267	0.82217	5.51781	0.63437	0.831761	0.00776568	0.660559	4.13869	0.392005	0.828515	0.00773267	0.82217	4.56018	0.524273	0.831761	0.00776568	0.660559	0.0262886	1857.21	161.64		265.633
33	FeldsparKrichBB_24	0.748503	3.76507	20220228_NeomaMSMS_SrF_LA_Chicago_Run2_RbSr_export_processed	Y	24563.5	176.848	1.625e+08	49526	59810	1288.13	2.63685	0.138704	0.787932	0.00797911	-0.225881	2.45841	0.205879	0.791018	0.00801276	-0.162787	1.84395	0.0969959	0.787932	0.00797911	-0.225881	2.03174	0.170148	0.791018	0.00801276	-0.162787	0.038951	2734.87	387.014		176.848
34	FeldsparKrichBB_25	9.625	4.90415	20220228_NeomaMSMS_SrF_LA_Chicago_Run2_RbSr_export_processed	Y	24563.5	176.848	3.01872e+08	49513	59924	1288.13	8.4743	0.377847	0.904312	0.00547997	0.724119	7.90082	0.623828	0.907855	0.00550601	0.371461	5.92608	0.264228	0.904312	0.00547997	0.724119	6.5296	0.51556	0.907855	0.00550601	0.371461	0.0300133	2116.5	155.178		176.848
35	FeldsparKrichBB_26	1.49638	0.130634	20220228_NeomaMSMS_SrF_LA_Chicago_Run2_RbSr_export_processed	Y	19412.8	157.217	6.48271e+08	44439	55469	988.44	3.99782	0.294828	0.804235	0.0105003	0.941769	3.72728	0.366808	0.807386	0.0105433	0.691782	2.79568	0.206173	0.804235	0.0105003	0.941769	3.08039	0.303147	0.807386	0.0105433	0.691782	0.0310045	2185.34	180.745		157.217
38	FeldsparKrichBB_27	15.044	10.255	20220228_NeomaMSMS_SrF_LA_Chicago_Run2_RbSr_export_processed	Y	166242	460.072	7.68024e+07	45024	44575	930	26.3819	2.83026	1.24986	0.0176698	0.0898479	25.0058	2.96405	1.25451	0.0177344	0.0762831	18.4489	1.9792	1.24986	0.0176698	0.0898479	20.6659	2.44963	1.25451	0.0177344	0.0762831	0.0262571	1855.02	223.586		460.072
39	FeldsparKrichBB_28	16.0889	21.0895	20220228_NeomaMSMS_SrF_LA_Chicago_Run2_RbSr_export_processed	Y	166242	460.072	5.38642e+07	45149	44511	930	39.5091	1.1949	1.56414	0.0279362	0.331226	37.4482	2.20151	1.56995	0.028039	0.162365	27.6287	0.835596	1.56414	0.0279362	0.331226	30.949	1.81943	1.56995	0.028039	0.162365	0.0277255	1957.35	122.236		460.072
40	FeldsparKrichBB_29	11.931	14.1037	20220228_NeomaMSMS_SrF_LA_Chicago_Run2_RbSr_export_processed	Y	166242	460.072	7.27073e+07	45239	44430	930	25.5643	1.07494	1.39585	0.019835	-0.228916	24.2308	1.59066	1.40104	0.0199076	-0.15569	17.8771	0.751707	1.39585	0.019835	-0.228916	20.0255	1.3146	1.40104	0.0199076	-0.15569	0.0344141	2421.64	183.38		460.072
41	FeldsparKrichBB_30	6.30964	0.264379	20220228_NeomaMSMS_SrF_LA_Chicago_Run2_RbSr_export_processed	Y	166242	460.072	1.83992e+08	45279	44309	930	10.6047	0.676434	0.929295	0.0112312	0.815644	10.0515	0.817212	0.934624	0.0112946	0.631381	7.41587	0.473031	0.929295	0.0112312	0.815644	8.30706	0.675381	0.934624	0.0112946	0.631381	0.0268138	1893.83	119.408		460.072
42	FeldsparKrichBB_31	1.12564	0.0886709	20220228_NeomaMSMS_SrF_LA_Chicago_Run2_RbSr_export_processed	Y	30651.9	197.553	4.95647e+08	46155	44257	930	2.16938	0.0669888	0.758836	0.00251152	0.46837	2.05622	0.121558	0.761659	0.00251798	0.201719	1.51705	0.0468453	0.758836	0.00251152	0.46837	1.69936	0.100462	0.761659	0.00251798	0.201719	0.0292926	2066.4	143.866		197.553
43	FeldsparKrichBB_32	0.128276	0.268095	20220228_NeomaMSMS_SrF_LA_Chicago_Run2_RbSr_export_processed				4.62282e+08	51485	46493	1187.5	0.470395	0.419703	0.731252	0.00182017	0.901034	0.445859	0.411094	0.733971	0.00182298	0.856169	0.328948	0.293499	0.731252	0.00182017	0.901034	0.368478	0.339747	0.733971	0.00182298	0.856169
94	BB_23			20220223_NeomaMSMS_SrF_LA_Chicago_Run1_RbSr_export_processed				1.10232e+06	48939	46420	1124.69	-0.982675	0.629121	#VALUE!	#VALUE!	#VALUE!	-0.878937	-0.568456	#VALUE!	#VALUE!	#VALUE!
95	BB_24			20220223_NeomaMSMS_SrF_LA_Chicago_Run1_RbSr_export_processed				1.14671e+06	48810	46566	1135	0.386606	1.19503	0.734876	9.33619	#VALUE!	0.345793	1.06935	0.736386	9.35537	#VALUE!
96	BB_25			20220223_NeomaMSMS_SrF_LA_Chicago_Run1_RbSr_export_processed				1.52987e+06	48959	46113	1138.13	-0.148968	-2.36432	0.765596	1.12198	#VALUE!	-0.133242	-2.11476	0.767169	1.12428	#VALUE!
97	BB_26			20220223_NeomaMSMS_SrF_LA_Chicago_Run1_RbSr_export_processed				1.12097e+06	48657	46308	1136.56	0.672928	8.6394	-0.441846	-24.3731	#VALUE!	0.601889	7.72757	-0.442753	-24.4231	#VALUE!
98	BB_27			20220223_NeomaMSMS_SrF_LA_Chicago_Run1_RbSr_export_processed				-1.39312e+07	49848	46718	1161.56	-0.0102031	-0.0334368	0.6773	0.0418338	0.255974	-0.00912595	-0.0299187	0.678692	0.0419199	0.255767
101	BB_28			20220223_NeomaMSMS_SrF_LA_Chicago_Run1_RbSr_export_processed				1.09977e+06	49868	46874	1169.38	-1.21687	-0.362818	-0.137306	-0.894406	#VALUE!	-1.09519	-0.33793	-0.137561	-0.896069	#VALUE!
											K/Rb	298	K2O/Rb	358.987	K2O/87Rb	110356
											Ca/Sr	1170	CaO/Sr	1637.09	CaO/86Sr	1.45478e+06
																13.1826
																										0	2190
																										500	2190
																										0	1400
																										500	1400
					98.9378		120.192
					154.325	74820.9	154.325	1853.26
						74820.9	154.325	1657.65
						74820.9	154.325	1592.73
					63.0758	12499	63.0758	2497.12
					145.129	66170	145.129	2006.01
					107.042	35996.6	107.042	2225.03
						35997	107.043	2405.49
					184.471	106907	184.471	2140.16
						106907	184.471	2414.15
						106907	184.471	2550.2
						106907	184.471	2309.29
					51.7148	8401.95	51.7148	1694.56
					55.4314	9652.99	55.4314	3026.66
					88.1745	24425	88.1745	2458.28
					112.676	39885.2	112.676	1963.02
						39885.2	112.676	2230.45
					58.6079	10791	58.6079	1954.4
					86.3006	23398	86.3006	2321.14
						23398	86.3006	2494.18
					132.817	55418.6	132.817	2219.15
						55418.6	132.817	2123.7
						55418.6	132.817	1857.21
					88.424	24563.5	88.424	2734.87
						24563.5	88.424	2116.5
					78.6084	19412.8	78.6084	2185.34
					230.036	166242	230.036	1855.02
						166242	230.036	1957.35
						166242	230.036	2421.64
						166242	230.036	1893.83
					98.7765	30651.9	98.7765	2066.4
																								a (um)	87Rb/86Sr	87Sr/86Sr
																								154.325	3.63463	0.807223
																								154.325	6.10273	0.854873
																								154.325	7.58929	0.882663
																								63.0758	1.32074	0.758773
																								145.129	1.14523	0.744433
																								107.042	4.22425	0.845267
																								107.043	1.97768	0.779478
																								184.471	6.12348	0.897751
																								184.471	7.28908	0.961938
																								184.471	6.62738	0.95228
																								184.471	6.14551	0.913401
																								51.7148	3.83994	0.803881
																								55.4314	6.2881	0.983497
																								88.1745	1.9102	0.77863
																								112.676	2.23598	0.774056
																								112.676	1.17686	0.749133
																								58.6079	1.85134	0.763131
																								86.3006	2.19063	0.784089
																								86.3006	1.17523	0.753557
																								132.817	1.30821	0.753078
																								132.817	2.06996	0.774221
																								132.817	4.56018	0.831761
																								88.424	2.03174	0.791018
																								88.424	6.5296	0.907855
																								78.6084	3.08039	0.807386
																								230.036	20.6659	1.25451
																								230.036	30.949	1.56995
																								230.036	20.0255	1.40104
																								230.036	8.30706	0.934624
																								98.7765	1.69936	0.761659

## Sheet: NZ_Feldspar
							Normalized FG-H					Normalized SRM 610
Index	Label		Count integral 88Sr	X(um)	Y(um)	Z(um)	87Rb/86Sr	±95% CI	87Sr/86Sr	±95% CI	rho	87Rb/86Sr	±95% CI	87Sr/86Sr	±95% CI	rho	Reference 87Rb/86Sr		Reference 87Sr/86Sr		File
8	BC24-F1-5_1	20220228_NeomaMSMS_SrF_LA_Chicago_Run4_Sr_export_processed	1.15446e+09	14721	56025.2	1349.69			0.70529	0.00032543				0.707053	0.000460931						20220228_NeomaMSMS_SrF_LA_Chicago_Run4_Sr_export_processed
9	BC24-F1-5_2	20220228_NeomaMSMS_SrF_LA_Chicago_Run4_Sr_export_processed	1.16551e+09	14864	55989.4	1349.69			0.70536	0.000359891				0.707123	0.000486018						20220228_NeomaMSMS_SrF_LA_Chicago_Run4_Sr_export_processed
10	BC24-F1-5_3	20220228_NeomaMSMS_SrF_LA_Chicago_Run4_Sr_export_processed	9.61281e+08	15034.4	55982	1349.69			0.705251	0.000381021				0.707013	0.000501911						20220228_NeomaMSMS_SrF_LA_Chicago_Run4_Sr_export_processed
11	BC24-F1-5_4	20220228_NeomaMSMS_SrF_LA_Chicago_Run4_Sr_export_processed	9.78452e+08	15219.8	55923.8	1349.69			0.705752	0.000358633				0.707516	0.000485204						20220228_NeomaMSMS_SrF_LA_Chicago_Run4_Sr_export_processed
12	BC24-F1-5_5	20220228_NeomaMSMS_SrF_LA_Chicago_Run4_Sr_export_processed	9.01953e+08	15370.8	55880.8	1349.69			0.705555	0.00041957				0.707318	0.000531999						20220228_NeomaMSMS_SrF_LA_Chicago_Run4_Sr_export_processed
15	BC24-F1-5_6	20220228_NeomaMSMS_SrF_LA_Chicago_Run4_Sr_export_processed	9.88301e+08	15536.8	55852.8	1349.69			0.705545	0.000375464				0.707337	0.000523986						20220228_NeomaMSMS_SrF_LA_Chicago_Run4_Sr_export_processed
16	BC24-F1-5_7	20220228_NeomaMSMS_SrF_LA_Chicago_Run4_Sr_export_processed	1.00995e+09	15674.6	55820.5	1349.69			0.705342	0.000393282				0.707133	0.00053689						20220228_NeomaMSMS_SrF_LA_Chicago_Run4_Sr_export_processed
17	BC20-F4-4_1	20220228_NeomaMSMS_SrF_LA_Chicago_Run4_Sr_export_processed	7.60663e+07	79199.2	22143.5	1349.69			0.706932	0.00336118				0.708728	0.00338945						20220228_NeomaMSMS_SrF_LA_Chicago_Run4_Sr_export_processed
18	BC20-F4-4_2	20220228_NeomaMSMS_SrF_LA_Chicago_Run4_Sr_export_processed	5.96668e+08	79268.2	22221.2	1349.69			0.705393	0.000524734				0.707184	0.000639969						20220228_NeomaMSMS_SrF_LA_Chicago_Run4_Sr_export_processed
19	BC20-F4-4_3	20220228_NeomaMSMS_SrF_LA_Chicago_Run4_Sr_export_processed	8.14982e+08	79371.7	22333.3	1349.69			0.705971	0.000402449				0.707764	0.000543894						20220228_NeomaMSMS_SrF_LA_Chicago_Run4_Sr_export_processed
22	BC20-F4-4_4	20220228_NeomaMSMS_SrF_LA_Chicago_Run4_Sr_export_processed	9.38774e+08	79451.4	22445.5	1349.69			0.705486	0.000457471				0.707381	0.000568736						20220228_NeomaMSMS_SrF_LA_Chicago_Run4_Sr_export_processed
23	BC20-F4-4_5	20220228_NeomaMSMS_SrF_LA_Chicago_Run4_Sr_export_processed	9.73474e+08	79557	22542.5	1349.69			0.705887	0.000367565				0.707783	0.000499013						20220228_NeomaMSMS_SrF_LA_Chicago_Run4_Sr_export_processed
24	BC20-F4-4_6	20220228_NeomaMSMS_SrF_LA_Chicago_Run4_Sr_export_processed	9.66812e+08	79656.2	22648.2	1349.69			0.705919	0.00036001				0.707815	0.000493455						20220228_NeomaMSMS_SrF_LA_Chicago_Run4_Sr_export_processed
25	BC20-F4-4_7	20220228_NeomaMSMS_SrF_LA_Chicago_Run4_Sr_export_processed	7.45247e+08	79746.8	22725.8	1349.69			0.706134	0.000472317				0.708031	0.000580987						20220228_NeomaMSMS_SrF_LA_Chicago_Run4_Sr_export_processed
26	BC20-F4-4_8	20220228_NeomaMSMS_SrF_LA_Chicago_Run4_Sr_export_processed	9.48082e+08	79835.2	22801.3	1349.69			0.705368	0.000461036				0.707262	0.000571589						20220228_NeomaMSMS_SrF_LA_Chicago_Run4_Sr_export_processed
29	BC20-F4-4_9	20220228_NeomaMSMS_SrF_LA_Chicago_Run4_Sr_export_processed	9.13501e+08	79919.3	22878.9	1349.69			0.705968	0.000437111				0.707581	0.000594581						20220228_NeomaMSMS_SrF_LA_Chicago_Run4_Sr_export_processed
30	BC20-F4-4_10	20220228_NeomaMSMS_SrF_LA_Chicago_Run4_Sr_export_processed	8.46e+08	79984.1	22982.5	1349.69			0.705664	0.000461935				0.707276	0.000613032						20220228_NeomaMSMS_SrF_LA_Chicago_Run4_Sr_export_processed
31	BC20-F4-4_11	20220228_NeomaMSMS_SrF_LA_Chicago_Run4_Sr_export_processed	5.05605e+08	79799.9	21901.6	1349.69			0.705847	0.000632467				0.707459	0.000750583						20220228_NeomaMSMS_SrF_LA_Chicago_Run4_Sr_export_processed
32	BC20-F4-4_12	20220228_NeomaMSMS_SrF_LA_Chicago_Run4_Sr_export_processed	9.09141e+08	79726.4	22056.2	1349.69			0.705714	0.000451157				0.707326	0.000604933						20220228_NeomaMSMS_SrF_LA_Chicago_Run4_Sr_export_processed
33	BC20-F4-4_13	20220228_NeomaMSMS_SrF_LA_Chicago_Run4_Sr_export_processed	1.84499e+08	79668.5	22191.4	1349.69			0.705376	0.00159807				0.706987	0.00165131						20220228_NeomaMSMS_SrF_LA_Chicago_Run4_Sr_export_processed
36	BC20-F4-4_14	20220228_NeomaMSMS_SrF_LA_Chicago_Run4_Sr_export_processed	1.72821e+08	79610.5	22284.2	1349.69			0.706592	0.00192931				0.708433	0.00197963						20220228_NeomaMSMS_SrF_LA_Chicago_Run4_Sr_export_processed
37	BC20-F4-4_15	20220228_NeomaMSMS_SrF_LA_Chicago_Run4_Sr_export_processed	9.41717e+08	79378.5	22566.3	1349.69			0.705438	0.000357552				0.707276	0.000552463						20220228_NeomaMSMS_SrF_LA_Chicago_Run4_Sr_export_processed
38	BC20-F4-4_16	20220228_NeomaMSMS_SrF_LA_Chicago_Run4_Sr_export_processed	9.40527e+08	79216.2	22686.1	1349.69			0.705386	0.000386495				0.707225	0.000571696						20220228_NeomaMSMS_SrF_LA_Chicago_Run4_Sr_export_processed
39	BC20-F4-4_17	20220228_NeomaMSMS_SrF_LA_Chicago_Run4_Sr_export_processed	9.3625e+08	79108	22782.7	1349.69			0.705436	0.000393043				0.707274	0.000576188						20220228_NeomaMSMS_SrF_LA_Chicago_Run4_Sr_export_processed
40	BC20-F4-4_18	20220228_NeomaMSMS_SrF_LA_Chicago_Run4_Sr_export_processed	8.86011e+08	78957.4	22906.6	1349.69			0.705637	0.000350173				0.707476	0.000547783						20220228_NeomaMSMS_SrF_LA_Chicago_Run4_Sr_export_processed
43	BC20-F4-4_19	20220228_NeomaMSMS_SrF_LA_Chicago_Run4_Sr_export_processed	8.89002e+08	78818.3	23018.6	1349.69			0.705308	0.000365966				0.707334	0.000582754						20220228_NeomaMSMS_SrF_LA_Chicago_Run4_Sr_export_processed
44	BC20-F4-4_20	20220228_NeomaMSMS_SrF_LA_Chicago_Run4_Sr_export_processed	7.60502e+08	78686.9	23076.6	1349.69			0.705177	0.000426001				0.707203	0.000622371						20220228_NeomaMSMS_SrF_LA_Chicago_Run4_Sr_export_processed
45	BC20-F4-4_21	20220228_NeomaMSMS_SrF_LA_Chicago_Run4_Sr_export_processed	7.88499e+08	78551.6	23161.6	1349.69			0.705314	0.000461822				0.70734	0.000647619						20220228_NeomaMSMS_SrF_LA_Chicago_Run4_Sr_export_processed
Davidson, J., Tepley III, F., Palacz, Z., & Meffan-Main, S. (2001). Magma recharge, contamination and residence times revealed by in situ laser ablation isotopic analysis of feldspar in volcanic rocks. Earth and Planetary Science Letters, 184(2), 427-442.
Davidson, J., Charlier, B., Hora, J. M., & Perlroth, R. (2005). Mineral isochrons and isotopic fingerprinting: Pitfalls and promises. Geology, 33(1), 29-32.
Woodhead, J. D., & Hergt, J. M. (2001). Strontium, neodymium and lead isotope analyses of NIST glass certified reference materials: SRM 610, 612, 614. Geostandards Newsletter, 25(2‐3), 261-266.
Yang, Y.H., Wu, F.Y., Yang, J.H., Chew, D.M., Xie, L.W., Chu, Z.Y., Zhang, Y.B. and Huang, C. (2014). Sr and Nd isotopic compositions of apatite reference materials used in U–Th–Pb geochronology. Chemical Geology, 385, 35-55.
								4.656
															0.000753892

## Sheet: BlackBeauty_ChemicalComposition
																														1.43					1.21
									Normalized FG-H					Normalized SRM 610																Normalized FG-H					Normalized SRM 610
Index	Label	K2O/CaO (wt%/wt%)			Count integral 88Sr	X(um)	Y(um)	Z(um)	87Rb/86Sr	±95% CI	87Sr/86Sr	±95% CI	rho	87Rb/86Sr	±95% CI	87Sr/86Sr	±95% CI	rho	Reference 87Rb/86Sr		Reference 87Sr/86Sr		File							87Rb/86Sr	±95% CI	87Sr/86Sr	±95% CI	rho	87Rb/86Sr	±95% CI	87Sr/86Sr	±95% CI	rho
62	BB_1	1.41297		20220223_NeomaMSMS_SrF_LA_Chicago_Run1_RbSr_export_processed	4.29281e+08	45592	48685	995.63	4.75984	0.326157	0.805515	0.0140889	0.566326	4.3979	0.528307	0.807223	0.0141185	0.327153					20220223_NeomaMSMS_SrF_LA_Chicago_Run1_RbSr_export_processed							3.32856	0.228082	0.805515	0.0140889	0.566326	3.63463	0.436618	0.807223	0.0141185	0.327153
63	BB_2	0.361264		20220223_NeomaMSMS_SrF_LA_Chicago_Run1_RbSr_export_processed	2.59988e+08	45544	48867	995.63	7.99201	1.71984	0.853064	0.0197928	0.983462	7.3843	1.74813	0.854873	0.0198345	0.895554					20220223_NeomaMSMS_SrF_LA_Chicago_Run1_RbSr_export_processed							5.58882	1.20268	0.853064	0.0197928	0.983462	6.10273	1.44473	0.854873	0.0198345	0.895554		X
66	BB_3	9.54098		20220223_NeomaMSMS_SrF_LA_Chicago_Run1_RbSr_export_processed	2.85551e+08	45652	48780	995.63	9.9656	2.89946	0.880849	0.0214693	0.498484	9.18304	2.82851	0.882663	0.0215162	0.475202					20220223_NeomaMSMS_SrF_LA_Chicago_Run1_RbSr_export_processed							6.96895	2.0276	0.880849	0.0214693	0.498484	7.58929	2.33761	0.882663	0.0215162	0.475202		X
67	BB_4	0.0293378		20220223_NeomaMSMS_SrF_LA_Chicago_Run1_RbSr_export_processed	1041136313	46703	48992	1071.56	0.0706096	0.00761491	0.708257	0.00066181	-0.546052	0.0650649	0.00961839	0.709715	0.00071772	-0.147202					20220223_NeomaMSMS_SrF_LA_Chicago_Run1_RbSr_export_processed							0.0493774	0.00532511	0.708257	0.00066181	-0.546052	0.0537727	0.00794908	0.709715	0.00071772	-0.147202
68	BB_5	0.0338346		20220223_NeomaMSMS_SrF_LA_Chicago_Run1_RbSr_export_processed	3.25116e+08	46354	49129	1076.25	0.0660481	0.0455091	0.709427	0.00487163	0.579465	0.0608616	0.0423846	0.710888	0.0048894	0.579313					20220223_NeomaMSMS_SrF_LA_Chicago_Run1_RbSr_export_processed							0.0461875	0.0318246	0.709427	0.00487163	0.579465	0.0502989	0.0350286	0.710888	0.0048894	0.579313
69	BB_6	0.0445026		20220223_NeomaMSMS_SrF_LA_Chicago_Run1_RbSr_export_processed	5.99199e+08	46390	49244	1021.25	0.081231	0.00471891	0.714665	0.00097463	0.0561955	0.0748522	0.00872827	0.716137	0.00101515	0.226707					20220223_NeomaMSMS_SrF_LA_Chicago_Run1_RbSr_export_processed							0.0568049	0.00329994	0.714665	0.00097463	0.0561955	0.0618613	0.00721345	0.716137	0.00101515	0.226707
70	BB_7	0.0150646		20220223_NeomaMSMS_SrF_LA_Chicago_Run1_RbSr_export_processed	6.96378e+08	46781	49266	1086.88	0.0741693	0.01004	0.713758	0.00246255	0.386403	0.068345	0.0115474	0.715228	0.00248307	0.36395					20220223_NeomaMSMS_SrF_LA_Chicago_Run1_RbSr_export_processed							0.0518666	0.00702101	0.713758	0.00246255	0.386403	0.0564835	0.00954329	0.715228	0.00248307	0.36395
73	BB_8	0.0218712		20220223_NeomaMSMS_SrF_LA_Chicago_Run1_RbSr_export_processed	3.56875e+08	46625	49294	1093.13	0.08317	0.0213998	0.716883	0.00069994	-0.610386	0.075045	0.0205156	0.718356	0.00072033	-0.48586					20220223_NeomaMSMS_SrF_LA_Chicago_Run1_RbSr_export_processed							0.0581609	0.0149649	0.716883	0.00069994	-0.610386	0.0620207	0.016955	0.718356	0.00072033	-0.48586
74	BB_9	0.0415184		20220223_NeomaMSMS_SrF_LA_Chicago_Run1_RbSr_export_processed	414316547	46433	49353	1083.44	0.0943219	0.00801886	0.711586	0.00126361	0.221199	0.0851074	0.0106837	0.713049	0.00127664	0.238257					20220223_NeomaMSMS_SrF_LA_Chicago_Run1_RbSr_export_processed							0.0659594	0.00560759	0.711586	0.00126361	0.221199	0.0703367	0.0088295	0.713049	0.00127664	0.238257
75	BB_10	0.0217606		20220223_NeomaMSMS_SrF_LA_Chicago_Run1_RbSr_export_processed	3.82958e+08	46332	49331	1054.69	0.0773355	0.0202273	0.712294	0.0011973	0.26633	0.0697804	0.0193558	0.713757	0.00121079	0.291678					20220223_NeomaMSMS_SrF_LA_Chicago_Run1_RbSr_export_processed							0.0540807	0.014145	0.712294	0.0011973	0.26633	0.0576698	0.0159965	0.713757	0.00121079	0.291678
76	BB_11	0.0548589		20220223_NeomaMSMS_SrF_LA_Chicago_Run1_RbSr_export_processed	4.48635e+08	46482	49660	1083.75	0.0826773	0.00428439	0.716016	0.00105789	-0.451234	0.0746004	0.00790057	0.717487	0.00107266	-0.0909054					20220223_NeomaMSMS_SrF_LA_Chicago_Run1_RbSr_export_processed							0.0578163	0.00299608	0.716016	0.00105789	-0.451234	0.0616532	0.0065294	0.717487	0.00107266	-0.0909054
77	BB_12	0.0588822		20220223_NeomaMSMS_SrF_LA_Chicago_Run1_RbSr_export_processed	814978249	46630	49435	1056.88	0.0612074	0.00567004	0.71107	0.00076799	0.126644	0.0552279	0.00722454	0.712531	0.0007866	0.227307					20220223_NeomaMSMS_SrF_LA_Chicago_Run1_RbSr_export_processed							0.0428023	0.00396506	0.71107	0.00076799	0.126644	0.0456429	0.00597069	0.712531	0.0007866	0.227307
80	BB_13	0.0374396		20220223_NeomaMSMS_SrF_LA_Chicago_Run1_RbSr_export_processed	4.44204e+08	46486	48965	1077.19	0.137012	0.0195218	0.718506	0.00134083	-0.522105	0.123483	0.0208036	0.719696	0.00133581	-0.466189					20220223_NeomaMSMS_SrF_LA_Chicago_Run1_RbSr_export_processed							0.0958126	0.0136516	0.718506	0.00134083	-0.522105	0.102052	0.017193	0.719696	0.00133581	-0.466189
81	BB_14	0.0253682		20220223_NeomaMSMS_SrF_LA_Chicago_Run1_RbSr_export_processed	368867505	46812	49110	1084.69	0.101056	0.0220016	0.715489	0.00226066	-0.255069	0.0910773	0.021453	0.716673	0.00226015	-0.245564					20220223_NeomaMSMS_SrF_LA_Chicago_Run1_RbSr_export_processed							0.0706686	0.0153857	0.715489	0.00226066	-0.255069	0.0752705	0.0177298	0.716673	0.00226015	-0.245564
82	BB_15	0.0420054		20220223_NeomaMSMS_SrF_LA_Chicago_Run1_RbSr_export_processed	5.90691e+08	46393	49035	1048.13	0.0646299	0.0023501	0.71273	0.00090107	0.546415	0.0582481	0.00564863	0.71391	0.00089192	0.149943					20220223_NeomaMSMS_SrF_LA_Chicago_Run1_RbSr_export_processed							0.0451958	0.00164343	0.71273	0.00090107	0.546415	0.0481389	0.00466829	0.71391	0.00089192	0.149943
83	BB_16	0.0170732		20220223_NeomaMSMS_SrF_LA_Chicago_Run1_RbSr_export_processed	7.88218e+08	46538	49212	1078.44	0.0532251	0.00277204	0.711903	0.00107526	0.343252	0.0479694	0.00498385	0.713082	0.00106816	0.128821					20220223_NeomaMSMS_SrF_LA_Chicago_Run1_RbSr_export_processed							0.0372203	0.00193849	0.711903	0.00107526	0.343252	0.0396441	0.00411888	0.713082	0.00106816	0.128821
84	BB_17	0.0107527		20220223_NeomaMSMS_SrF_LA_Chicago_Run1_RbSr_export_processed	5.95696e+08	46695	49143	1083.44	0.0661421	0.00745325	0.715119	0.00104616	0.729824	0.0596109	0.00859308	0.716303	0.00103868	0.542307					20220223_NeomaMSMS_SrF_LA_Chicago_Run1_RbSr_export_processed							0.0462532	0.00521206	0.715119	0.00104616	0.729824	0.0492652	0.00710172	0.716303	0.00103868	0.542307
87	BB_18			20220223_NeomaMSMS_SrF_LA_Chicago_Run1_RbSr_export_processed	7.81198e+08	47401	49447	1115.63	0.0454604	0.00346723	0.702189	0.00087574	0.546418	0.0403442	0.00490004	0.703431	0.0009092	0.397545					20220223_NeomaMSMS_SrF_LA_Chicago_Run1_RbSr_export_processed							0.0317905	0.00242464	0.702189	0.00087574	0.546418	0.0333423	0.00404962	0.703431	0.0009092	0.397545
88	BB_19			20220223_NeomaMSMS_SrF_LA_Chicago_Run1_RbSr_export_processed	7.12408e+08	47304	49687	1056.25	0.0463688	0.00097652	0.7046	0.00068998	-0.110867	0.0411504	0.00398502	0.705846	0.00073154	0.0811698					20220223_NeomaMSMS_SrF_LA_Chicago_Run1_RbSr_export_processed							0.0324257	0.000682881	0.7046	0.00068998	-0.110867	0.0340086	0.0032934	0.705846	0.00073154	0.0811698
89	BB_20	0.0319749		20220223_NeomaMSMS_SrF_LA_Chicago_Run1_RbSr_export_processed	1012706590	47895	48606	1074.38	0.00758209	0.00034861	0.702403	0.00059162	-0.456273	0.00672879	0.00070728	0.703644	0.00063898	-0.0758175					20220223_NeomaMSMS_SrF_LA_Chicago_Run1_RbSr_export_processed							0.00530216	0.000243783	0.702403	0.00059162	-0.456273	0.00556099	0.000584529	0.703644	0.00063898	-0.0758175
90	BB_21	0.021418		20220223_NeomaMSMS_SrF_LA_Chicago_Run1_RbSr_export_processed	8.93886e+08	47969	48791	1108.13	0.0101265	0.00235879	0.701479	0.00110497	0.855975	0.00898687	0.00225912	0.702719	0.00113233	0.801119					20220223_NeomaMSMS_SrF_LA_Chicago_Run1_RbSr_export_processed							0.00708148	0.0016495	0.701479	0.00110497	0.855975	0.00742716	0.00186704	0.702719	0.00113233	0.801119
91	BB_22	0.0233645		20220223_NeomaMSMS_SrF_LA_Chicago_Run1_RbSr_export_processed	7.4412e+08	48053	48492	1122.5	0.0159075	0.00043627	0.702342	0.00184665	0.282207	0.0141173	0.00138944	0.703584	0.00186526	0.117976					20220223_NeomaMSMS_SrF_LA_Chicago_Run1_RbSr_export_processed							0.0111241	0.000305084	0.702342	0.00184665	0.282207	0.0116672	0.0011483	0.703584	0.00186526	0.117976
102	BB_29	0.0344828		20220223_NeomaMSMS_SrF_LA_Chicago_Run1_RbSr_export_processed	9.08689e+08	49086	48278	1147.19	0.0146079	0.00068678	0.702331	0.00077255	-0.258309	0.0131472	0.00121362	0.703638	0.00078109	-0.0410532					20220223_NeomaMSMS_SrF_LA_Chicago_Run1_RbSr_export_processed							0.0102153	0.000480266	0.702331	0.00077255	-0.258309	0.0108655	0.00100299	0.703638	0.00078109	-0.0410532
103	BB_30	0.0363349		20220223_NeomaMSMS_SrF_LA_Chicago_Run1_RbSr_export_processed	7.08827e+08	48957	48404	1169.38	0.0206395	0.0013558	0.701151	0.00088257	-0.104197	0.0185756	0.00191482	0.702455	0.00089041	0.0041028					20220223_NeomaMSMS_SrF_LA_Chicago_Run1_RbSr_export_processed							0.0144332	0.000948112	0.701151	0.00088257	-0.104197	0.0153518	0.0015825	0.702455	0.00089041	0.0041028
104	BB_31	0.0525088		20220223_NeomaMSMS_SrF_LA_Chicago_Run1_RbSr_export_processed	8.77195e+08	49152	48458	1169.38	0.0337827	0.00220101	0.702842	0.00116964	0.435293	0.0304046	0.00312379	0.70415	0.00117652	0.328245					20220223_NeomaMSMS_SrF_LA_Chicago_Run1_RbSr_export_processed							0.0236242	0.00153917	0.702842	0.00116964	0.435293	0.0251278	0.00258164	0.70415	0.00117652	0.328245
105	BB_32	0.0732984		20220223_NeomaMSMS_SrF_LA_Chicago_Run1_RbSr_export_processed	6.83659e+08	49603	48218	1169.38	0.0597254	0.00627719	0.70444	0.00096792	0.513539	0.0537532	0.00708177	0.70575	0.00097543	0.45754					20220223_NeomaMSMS_SrF_LA_Chicago_Run1_RbSr_export_processed							0.041766	0.00438964	0.70444	0.00096792	0.513539	0.0444242	0.0058527	0.70575	0.00097543	0.45754
108	BB_33	0.1398		20220223_NeomaMSMS_SrF_LA_Chicago_Run1_RbSr_export_processed	743071215	49623	48389	1169.38	0.113781	0.00761106	0.705136	0.00087554	0.18964	0.0995528	0.0105452	0.706714	0.00095685	0.327988					20220223_NeomaMSMS_SrF_LA_Chicago_Run1_RbSr_export_processed							0.0795672	0.00532242	0.705136	0.00087554	0.18964	0.082275	0.00871507	0.706714	0.00095685	0.327988
109	BB_34	0.206271		20220223_NeomaMSMS_SrF_LA_Chicago_Run1_RbSr_export_processed	5.9402e+08	49761	48295	1169.38	0.205416	0.0453735	0.712334	0.00082286	0.165708	0.179729	0.0423551	0.713928	0.00091031	0.244836					20220223_NeomaMSMS_SrF_LA_Chicago_Run1_RbSr_export_processed							0.143648	0.0317297	0.712334	0.00082286	0.165708	0.148536	0.0350042	0.713928	0.00091031	0.244836
110	BB_35	0.056		20220223_NeomaMSMS_SrF_LA_Chicago_Run1_RbSr_export_processed	232928719	49950	48042	1196.56	0.161753	0.0283159	0.726973	0.00189918	0.786115	0.141526	0.0273663	0.7286	0.00194364	0.757609					20220223_NeomaMSMS_SrF_LA_Chicago_Run1_RbSr_export_processed							0.113114	0.0198013	0.726973	0.00189918	0.786115	0.116963	0.0226168	0.7286	0.00194364	0.757609
111	BB_36	0.0411523		20220223_NeomaMSMS_SrF_LA_Chicago_Run1_RbSr_export_processed	2.24025e+08	50076	47978	1203.44	0.177651	0.0195254	0.72922	0.00389341	-0.129517	0.155436	0.0213268	0.730852	0.00392202	-0.0607285					20220223_NeomaMSMS_SrF_LA_Chicago_Run1_RbSr_export_processed							0.124231	0.0136541	0.72922	0.00389341	-0.129517	0.128459	0.0176255	0.730852	0.00392202	-0.0607285
112	BB_37	0.0213777		20220223_NeomaMSMS_SrF_LA_Chicago_Run1_RbSr_export_processed	1.57797e+08	50227	47931	1192.19	0.161666	0.0194684	0.717554	0.00788581	-0.902108	0.141449	0.0206185	0.71916	0.00791299	-0.724868					20220223_NeomaMSMS_SrF_LA_Chicago_Run1_RbSr_export_processed							0.113053	0.0136143	0.717554	0.00788581	-0.902108	0.1169	0.0170401	0.71916	0.00791299	-0.724868
115	BB_38	0.0439189		20220223_NeomaMSMS_SrF_LA_Chicago_Run1_RbSr_export_processed	2.50994e+08	50071	48300	1203.75	0.15011	0.00861805	0.729179	0.00266069	0.520188	0.130527	0.0122188	0.731262	0.00269678	0.450571					20220223_NeomaMSMS_SrF_LA_Chicago_Run1_RbSr_export_processed							0.104972	0.00602661	0.729179	0.00266069	0.520188	0.107874	0.0100982	0.731262	0.00269678	0.450571
116	BB_39	0.0334572		20220223_NeomaMSMS_SrF_LA_Chicago_Run1_RbSr_export_processed	1.50843e+08	50195	48391	1197.5	0.153834	0.00480002	0.71548	0.00749803	0.575415	0.133766	0.0107352	0.717524	0.00752922	0.278738					20220223_NeomaMSMS_SrF_LA_Chicago_Run1_RbSr_export_processed							0.107577	0.00335666	0.71548	0.00749803	0.575415	0.11055	0.00887202	0.717524	0.00752922	0.278738
117	BB_40			20220223_NeomaMSMS_SrF_LA_Chicago_Run1_RbSr_export_processed	5.71844e+08	51068	47767	1232.81	0.120812	0.00539441	0.712369	0.00109052	0.400721	0.105051	0.00907386	0.714404	0.00115842	0.528101					20220223_NeomaMSMS_SrF_LA_Chicago_Run1_RbSr_export_processed							0.0844838	0.00377231	0.712369	0.00109052	0.400721	0.0868193	0.00749906	0.714404	0.00115842	0.528101
118	BB_41			20220223_NeomaMSMS_SrF_LA_Chicago_Run1_RbSr_export_processed	1.92356e+08	50883	47530	1211.56	0.0627269	0.0113465	0.713964	0.0032984	-0.674915	0.0545439	0.0106587	0.716003	0.0033299	-0.569348					20220223_NeomaMSMS_SrF_LA_Chicago_Run1_RbSr_export_processed							0.0438649	0.0079346	0.713964	0.0032984	-0.674915	0.0450776	0.00880884	0.716003	0.0033299	-0.569348
119	BB_42			20220223_NeomaMSMS_SrF_LA_Chicago_Run1_RbSr_export_processed	1.29663e+08	51788	47426	1169.38	0.0878684	0.0248161	0.712025	0.00664703	0.387844	0.0764056	0.022306	0.714059	0.00667694	0.391646					20220223_NeomaMSMS_SrF_LA_Chicago_Run1_RbSr_export_processed							0.0614465	0.0173539	0.712025	0.00664703	0.387844	0.0631451	0.0184347	0.714059	0.00667694	0.391646
122	BB_43			20220223_NeomaMSMS_SrF_LA_Chicago_Run1_RbSr_export_processed	9.9828e+08	52098	47451	1243.13	0.0275804	0.00077244	0.702847	0.00066462	-0.415275	0.0240191	0.00171038	0.704926	0.00066461	0.209268					20220223_NeomaMSMS_SrF_LA_Chicago_Run1_RbSr_export_processed							0.019287	0.000540168	0.702847	0.00066462	-0.415275	0.0198505	0.00141354	0.704926	0.00066461	0.209268
123	BB_44	0.00226031		20220223_NeomaMSMS_SrF_LA_Chicago_Run1_RbSr_export_processed	1530458390	52487	47601	1284.69	0.00188269	0.00083657	0.708774	0.00163654	0.893356	0.00163959	0.00073642	0.710871	0.00164057	0.908418					20220223_NeomaMSMS_SrF_LA_Chicago_Run1_RbSr_export_processed							0.00131657	0.000585014	0.708774	0.00163654	0.893356	0.00135503	0.000608612	0.710871	0.00164057	0.908418
124	BB_45	0		20220223_NeomaMSMS_SrF_LA_Chicago_Run1_RbSr_export_processed	1633573353	52457	47777	1278.44	0.00522316	0.00287017	0.708361	0.00052107	-0.251222	0.00454872	0.00251723	0.710456	0.00052005	-0.188855					20220223_NeomaMSMS_SrF_LA_Chicago_Run1_RbSr_export_processed							0.00365256	0.00200711	0.708361	0.00052107	-0.251222	0.00375927	0.00208036	0.710456	0.00052005	-0.188855
125	BB_46	0.0472973		20220223_NeomaMSMS_SrF_LA_Chicago_Run1_RbSr_export_processed	7.01177e+08	53570	50012	1352.5	0.0804806	0.00364187	0.710775	0.00118807	0.598661	0.0700885	0.00557813	0.712878	0.00119045	0.529174					20220223_NeomaMSMS_SrF_LA_Chicago_Run1_RbSr_export_processed							0.0562801	0.00254676	0.710775	0.00118807	0.598661	0.0579243	0.00461002	0.712878	0.00119045	0.529174
126	BB_47			20220223_NeomaMSMS_SrF_LA_Chicago_Run1_RbSr_export_processed	5.24982e+08	53307	50094	1272.5	0.0148071	0.00467898	0.701065	0.00080073	0.551519	0.0128951	0.00416134	0.703139	0.00080147	0.609246					20220223_NeomaMSMS_SrF_LA_Chicago_Run1_RbSr_export_processed							0.0103546	0.00327201	0.701065	0.00080073	0.551519	0.0106571	0.00343912	0.703139	0.00080147	0.609246
129	BB_48	0.0756219		20220223_NeomaMSMS_SrF_LA_Chicago_Run1_RbSr_export_processed	3.81242e+08	53752	50186	1308.44	0.429698	0.0844757	0.732096	0.00267358	0.826338	0.371998	0.0791558	0.73386	0.00268921	0.786654					20220223_NeomaMSMS_SrF_LA_Chicago_Run1_RbSr_export_processed							0.300488	0.0590739	0.732096	0.00267358	0.826338	0.307437	0.065418	0.73386	0.00268921	0.786654
130	BB_49	0.0643447		20220223_NeomaMSMS_SrF_LA_Chicago_Run1_RbSr_export_processed	7.583e+08	53223	50868	1349.69	0.0240431	0.00053978	0.702779	0.00062292	0.0603349	0.0208146	0.00175791	0.704472	0.00065984	0.269569					20220223_NeomaMSMS_SrF_LA_Chicago_Run1_RbSr_export_processed							0.0168133	0.000377469	0.702779	0.00062292	0.0603349	0.0172021	0.00145282	0.704472	0.00065984	0.269569
131	BB_50	0.0465368		20220223_NeomaMSMS_SrF_LA_Chicago_Run1_RbSr_export_processed	8.31308e+08	52861	50965	1349.69	0.028643	0.00201794	0.702485	0.00094559	0.464855	0.0247969	0.00266979	0.704176	0.00097154	0.432233					20220223_NeomaMSMS_SrF_LA_Chicago_Run1_RbSr_export_processed							0.0200301	0.00141115	0.702485	0.00094559	0.464855	0.0204933	0.00220644	0.704176	0.00097154	0.432233
132	BB_51	0.0560472		20220223_NeomaMSMS_SrF_LA_Chicago_Run1_RbSr_export_processed	8.37754e+08	53448	51118	1349.69	0.014488	0.00154826	0.700311	0.00107086	-0.546027	0.0125426	0.00168504	0.701998	0.00109427	-0.32997					20220223_NeomaMSMS_SrF_LA_Chicago_Run1_RbSr_export_processed							0.0101315	0.0010827	0.700311	0.00107086	-0.546027	0.0103658	0.0013926	0.701998	0.00109427	-0.32997
133	BB_52	0.0236862		20220223_NeomaMSMS_SrF_LA_Chicago_Run1_RbSr_export_processed	8.80405e+08	53323	51150	1349.69	0.0248884	0.00237134	0.701646	0.00082076	0.362673	0.0215464	0.00270034	0.703336	0.00084984	0.399813					20220223_NeomaMSMS_SrF_LA_Chicago_Run1_RbSr_export_processed							0.0174045	0.00165828	0.701646	0.00082076	0.362673	0.017807	0.00223169	0.703336	0.00084984	0.399813
136	BB_53	0.0598469		20220223_NeomaMSMS_SrF_LA_Chicago_Run1_RbSr_export_processed	8.73159e+08	52905	51149	1349.69	0.370109	0.032059	0.711378	0.00167297	0.60064	0.315449	0.0386237	0.712058	0.00167877	0.429014					20220223_NeomaMSMS_SrF_LA_Chicago_Run1_RbSr_export_processed							0.258817	0.0224189	0.711378	0.00167297	0.60064	0.260701	0.0319204	0.712058	0.00167877	0.429014
137	BB_54	0.0187416		20220223_NeomaMSMS_SrF_LA_Chicago_Run1_RbSr_export_processed	8.51269e+08	52990	51416	1349.69	0.026585	0.00827781	0.703813	0.00094445	0.170023	0.0226588	0.00732271	0.704486	0.0009526	0.16597					20220223_NeomaMSMS_SrF_LA_Chicago_Run1_RbSr_export_processed							0.0185909	0.00578868	0.703813	0.00094445	0.170023	0.0187262	0.00605183	0.704486	0.0009526	0.16597
138	BB_55	0.165605		20220223_NeomaMSMS_SrF_LA_Chicago_Run1_RbSr_export_processed	1.36889e+08	52233	48350	1278.13	0.147651	0.0482656	0.726927	0.0313882	-0.0140279	0.125845	0.0425545	0.727622	0.0314185	-0.0134588					20220223_NeomaMSMS_SrF_LA_Chicago_Run1_RbSr_export_processed							0.103252	0.0337522	0.726927	0.0313882	-0.0140279	0.104004	0.035169	0.727622	0.0314185	-0.0134588
139	BB_56	0.0456853		20220223_NeomaMSMS_SrF_LA_Chicago_Run1_RbSr_export_processed	1.49466e+08	52097	48546	1280.94	0.0924847	0.0139246	0.709775	0.0127238	-0.137171	0.078826	0.0136888	0.710454	0.0127365	-0.118443					20220223_NeomaMSMS_SrF_LA_Chicago_Run1_RbSr_export_processed							0.0646746	0.00973748	0.709775	0.0127238	-0.137171	0.0651455	0.0113131	0.710454	0.0127365	-0.118443
140	BB_57	0.0121141		20220223_NeomaMSMS_SrF_LA_Chicago_Run1_RbSr_export_processed	5.42219e+08	51662	49403	1265.63	0.00715024	0.00255931	0.706294	0.00095697	0.264994	0.00609425	0.00224418	0.706969	0.0009651	0.258608					20220223_NeomaMSMS_SrF_LA_Chicago_Run1_RbSr_export_processed							0.00500017	0.00178973	0.706294	0.00095697	0.264994	0.00503657	0.00185469	0.706969	0.0009651	0.258608
143	BB_58	0.0138889		20220223_NeomaMSMS_SrF_LA_Chicago_Run1_RbSr_export_processed	7.52514e+07	51547	49163	1262.81	0.0789902	0.0168734	0.704976	0.0122273	-0.629605	0.0699592	0.015748	0.705118	0.0122273	-0.598874					20220223_NeomaMSMS_SrF_LA_Chicago_Run1_RbSr_export_processed							0.0552379	0.0117996	0.704976	0.0122273	-0.629605	0.0578175	0.0130149	0.705118	0.0122273	-0.598874
144	BB_59	0.0695574		20220223_NeomaMSMS_SrF_LA_Chicago_Run1_RbSr_export_processed	2.68544e+08	51464	49312	1233.13	1.80439	0.114381	0.758621	0.00477664	0.360816	1.59809	0.152105	0.758773	0.00477001	0.232336					20220223_NeomaMSMS_SrF_LA_Chicago_Run1_RbSr_export_processed							1.26181	0.079987	0.758621	0.00477664	0.360816	1.32074	0.125707	0.758773	0.00477001	0.232336
145	BB_66	0.131349		20220223_NeomaMSMS_SrF_LA_Chicago_Run1_RbSr_export_processed	4.2401e+08	51492	47377	1169.38	0.181106	0.0142887	0.724813	0.00208944	0.178344	0.1604	0.0170246	0.724959	0.00207398	0.117122					20220223_NeomaMSMS_SrF_LA_Chicago_Run1_RbSr_export_processed							0.126647	0.00999209	0.724813	0.00208944	0.178344	0.132562	0.0140699	0.724959	0.00207398	0.117122
146	BB_67	0.10125		20220223_NeomaMSMS_SrF_LA_Chicago_Run1_RbSr_export_processed	1048682562	47810	53397	1233.13	0.236119	0.0148876	0.718692	0.00071365	0.141381	0.209123	0.019857	0.718836	0.0006667	0.0437505					20220223_NeomaMSMS_SrF_LA_Chicago_Run1_RbSr_export_processed							0.165118	0.0104109	0.718692	0.00071365	0.141381	0.172829	0.0164107	0.718836	0.0006667	0.0437505
147	BB_68	0.0871863		20220223_NeomaMSMS_SrF_LA_Chicago_Run1_RbSr_export_processed	9.01314e+08	47616	53356	1233.13	0.247532	0.0338614	0.720684	0.00119068	0.295731	0.219232	0.0337886	0.720829	0.00116314	0.248652					20220223_NeomaMSMS_SrF_LA_Chicago_Run1_RbSr_export_processed							0.173099	0.0236793	0.720684	0.00119068	0.295731	0.181183	0.0279244	0.720829	0.00116314	0.248652
150	BB_69	0.0322222		20220223_NeomaMSMS_SrF_LA_Chicago_Run1_RbSr_export_processed	6.47828e+08	47464	53331	1233.13	0.370337	0.140224	0.721511	0.00288307	0.592165	0.322173	0.123993	0.721971	0.00287607	0.589987					20220223_NeomaMSMS_SrF_LA_Chicago_Run1_RbSr_export_processed							0.258977	0.0980589	0.721511	0.00288307	0.592165	0.266259	0.102474	0.721971	0.00287607	0.589987
151	BB_70	0.0695915		20220223_NeomaMSMS_SrF_LA_Chicago_Run1_RbSr_export_processed	5.15881e+08	47340	53318	1226.25	0.455359	0.0616164	0.720889	0.00106854	-0.431978	0.396138	0.0601589	0.721349	0.00104518	-0.354673					20220223_NeomaMSMS_SrF_LA_Chicago_Run1_RbSr_export_processed							0.318433	0.0430884	0.720889	0.00106854	-0.431978	0.327387	0.0497181	0.721349	0.00104518	-0.354673
152	BB_71	0.0917538		20220223_NeomaMSMS_SrF_LA_Chicago_Run1_RbSr_export_processed	1104744530	46826	53259	1104.38	0.32905	0.0274497	0.717487	0.00077231	0.659233	0.286256	0.0309788	0.717945	0.0007395	0.608203					20220223_NeomaMSMS_SrF_LA_Chicago_Run1_RbSr_export_processed							0.230105	0.0191956	0.717487	0.00077231	0.659233	0.236575	0.0256023	0.717945	0.0007395	0.608203
153	BB_72	0.23416		20220223_NeomaMSMS_SrF_LA_Chicago_Run1_RbSr_export_processed	1186491899	46694	53245	1154.69	0.278734	0.0144331	0.716399	0.00051187	0.116286	0.242484	0.020907	0.716856	0.00046058	0.232913					20220223_NeomaMSMS_SrF_LA_Chicago_Run1_RbSr_export_processed							0.194919	0.0100931	0.716399	0.00051187	0.116286	0.2004	0.0172785	0.716856	0.00046058	0.232913
154	BB_73	0.11976		20220223_NeomaMSMS_SrF_LA_Chicago_Run1_RbSr_export_processed	8.42664e+08	46935	53197	1126.88	0.26328	0.00929263	0.719571	0.00094113	0.260422	0.229039	0.017739	0.72003	0.00091444	0.209658					20220223_NeomaMSMS_SrF_LA_Chicago_Run1_RbSr_export_processed							0.184112	0.00649834	0.719571	0.00094113	0.260422	0.189289	0.0146603	0.72003	0.00091444	0.209658
157	BB_74	0.168354		20220223_NeomaMSMS_SrF_LA_Chicago_Run1_RbSr_export_processed	9.30189e+08	46970	53090	1146.56	0.319718	0.0371572	0.720653	0.00089191	0.739171	0.268997	0.0363372	0.721599	0.00097726	0.621124					20220223_NeomaMSMS_SrF_LA_Chicago_Run1_RbSr_export_processed							0.223579	0.0259841	0.720653	0.00089191	0.739171	0.222311	0.0300307	0.721599	0.00097726	0.621124
158	BB_75	0.138009		20220223_NeomaMSMS_SrF_LA_Chicago_Run1_RbSr_export_processed	1112646494	47023	52801	1097.81	0.26119	0.0285647	0.719172	0.00094375	0.335524	0.219754	0.0283996	0.720116	0.00102461	0.301636					20220223_NeomaMSMS_SrF_LA_Chicago_Run1_RbSr_export_processed							0.182651	0.0199753	0.719172	0.00094375	0.335524	0.181615	0.0234707	0.720116	0.00102461	0.301636
159	BB_76	0.0467033		20220223_NeomaMSMS_SrF_LA_Chicago_Run1_RbSr_export_processed	3.64679e+08	47784	53178	1163.13	0.587569	0.0566526	0.727125	0.00155719	0.117517	0.494354	0.0585711	0.728079	0.00160982	0.120541					20220223_NeomaMSMS_SrF_LA_Chicago_Run1_RbSr_export_processed							0.410887	0.0396172	0.727125	0.00155719	0.117517	0.408557	0.0484059	0.728079	0.00160982	0.120541
160	BB_77	0.0862069		20220223_NeomaMSMS_SrF_LA_Chicago_Run1_RbSr_export_processed	3.77128e+08	47750	53016	1155.63	0.690106	0.0760152	0.729448	0.00330912	0.740003	0.580624	0.0754231	0.730406	0.00333772	0.635251					20220223_NeomaMSMS_SrF_LA_Chicago_Run1_RbSr_export_processed							0.482591	0.0531575	0.729448	0.00330912	0.740003	0.479855	0.0623331	0.730406	0.00333772	0.635251
161	BB_78	0.05		20220223_NeomaMSMS_SrF_LA_Chicago_Run1_RbSr_export_processed	3.59839e+08	47331	53048	1153.75	0.912009	1.00561	0.729953	0.0112514	0.978995	0.767324	0.84772	0.730911	0.0112734	0.9769					20220223_NeomaMSMS_SrF_LA_Chicago_Run1_RbSr_export_processed							0.637769	0.703221	0.729953	0.0112514	0.978995	0.634152	0.700595	0.730911	0.0112734	0.9769
164	BB_79	0.0237113		20220223_NeomaMSMS_SrF_LA_Chicago_Run1_RbSr_export_processed	3.08698e+08	47680	53569	1181.56	0.400677	0.0347552	0.724895	0.00130673	0.458997	0.342705	0.0362962	0.726184	0.0014153	0.385589					20220223_NeomaMSMS_SrF_LA_Chicago_Run1_RbSr_export_processed							0.280194	0.0243043	0.724895	0.00130673	0.458997	0.283227	0.0299969	0.726184	0.0014153	0.385589
165	BB_80	0.0347448		20220223_NeomaMSMS_SrF_LA_Chicago_Run1_RbSr_export_processed	2.74628e+08	47154	53703	1186.25	1.62014	1.34157	0.743111	0.0191856	0.95567	1.38573	1.15055	0.744433	0.0192276	0.953079					20220223_NeomaMSMS_SrF_LA_Chicago_Run1_RbSr_export_processed							1.13296	0.938163	0.743111	0.0191856	0.95567	1.14523	0.950871	0.744433	0.0192276	0.953079
166	BB_81	0.0947368		20220223_NeomaMSMS_SrF_LA_Chicago_Run1_RbSr_export_processed	1296320052	47458	53861	1142.19	0.0650744	0.0154835	0.717365	0.00110419	0.497064	0.0556592	0.0136684	0.71864	0.00122762	0.452595					20220223_NeomaMSMS_SrF_LA_Chicago_Run1_RbSr_export_processed							0.0455066	0.0108276	0.717365	0.00110419	0.497064	0.0459993	0.0112962	0.71864	0.00122762	0.452595
167	BB_82	0.0328738		20220223_NeomaMSMS_SrF_LA_Chicago_Run1_RbSr_export_processed	362833977	46608	53624	1148.44	0.978357	0.0610957	0.733366	0.00324119	0.865504	0.836804	0.072916	0.73467	0.00329226	0.631767					20220223_NeomaMSMS_SrF_LA_Chicago_Run1_RbSr_export_processed							0.684166	0.0427243	0.733366	0.00324119	0.865504	0.691574	0.0602612	0.73467	0.00329226	0.631767
168	BB_83	0.0216418		20220223_NeomaMSMS_SrF_LA_Chicago_Run1_RbSr_export_processed	4.70788e+08	47388	55256	1148.44	0.0727331	0.00505374	0.715904	0.00152926	0.488271	0.0622098	0.00574255	0.717177	0.00162151	0.384715					20220223_NeomaMSMS_SrF_LA_Chicago_Run1_RbSr_export_processed							0.0508623	0.00353408	0.715904	0.00152926	0.488271	0.0514131	0.00474591	0.717177	0.00162151	0.384715
171	BB_84	0.0341805		20220223_NeomaMSMS_SrF_LA_Chicago_Run1_RbSr_export_processed	728053769	47536	55552	1177.81	0.0550753	0.00216639	0.707324	0.00086721	0.18102	0.0459747	0.0035979	0.708537	0.00096099	0.0809641					20220223_NeomaMSMS_SrF_LA_Chicago_Run1_RbSr_export_processed							0.0385142	0.00151496	0.707324	0.00086721	0.18102	0.0379956	0.00297347	0.708537	0.00096099	0.0809641
172	BB_85	0.00965108		20220223_NeomaMSMS_SrF_LA_Chicago_Run1_RbSr_export_processed	5.21068e+08	47501	55986	1184.69	0.0567334	0.00292734	0.709454	0.00097924	0.825857	0.0473589	0.00402954	0.710671	0.00106399	0.460649					20220223_NeomaMSMS_SrF_LA_Chicago_Run1_RbSr_export_processed							0.0396737	0.00204709	0.709454	0.00097924	0.825857	0.0391396	0.0033302	0.710671	0.00106399	0.460649
173	BB_86	0.044702		20220223_NeomaMSMS_SrF_LA_Chicago_Run1_RbSr_export_processed	4.60755e+08	47970	56346	1185	0.0659889	0.00798979	0.713708	0.00035798	-0.19547	0.055085	0.00764014	0.714931	0.0005482	-0.1129					20220223_NeomaMSMS_SrF_LA_Chicago_Run1_RbSr_export_processed							0.0461461	0.00558727	0.713708	0.00035798	-0.19547	0.0455248	0.00631417	0.714931	0.0005482	-0.1129
174	BB_87	0.0113101		20220223_NeomaMSMS_SrF_LA_Chicago_Run1_RbSr_export_processed	4.81069e+08	48324	55803	1169.06	0.0558027	0.00566118	0.715414	0.00066872	-0.225803	0.0465819	0.00568017	0.71664	0.00078834	-0.160645					20220223_NeomaMSMS_SrF_LA_Chicago_Run1_RbSr_export_processed							0.0390229	0.00395887	0.715414	0.00066872	-0.225803	0.0384975	0.00469436	0.71664	0.00078834	-0.160645
175	BB_88	0.0324022		20220223_NeomaMSMS_SrF_LA_Chicago_Run1_RbSr_export_processed	4.06184e+08	48078	55255	1180.31	0.173163	0.0115631	0.719277	0.00210689	0.684112	0.14455	0.0137407	0.72051	0.00215147	0.470936					20220223_NeomaMSMS_SrF_LA_Chicago_Run1_RbSr_export_processed							0.121093	0.00808606	0.719277	0.00210689	0.684112	0.119462	0.0113559	0.72051	0.00215147	0.470936
178	BB_89	0.0267857		20220223_NeomaMSMS_SrF_LA_Chicago_Run1_RbSr_export_processed	6.21902e+08	48001	55792	1181.25	0.0562626	0.00516658	0.71161	0.00112424	0.506644	0.0463745	0.0053722	0.712561	0.00113639	0.382131					20220223_NeomaMSMS_SrF_LA_Chicago_Run1_RbSr_export_processed							0.0393445	0.00361299	0.71161	0.00112424	0.506644	0.038326	0.00443983	0.712561	0.00113639	0.382131
3	FeldsparKrichBB_1	1.56025		20220228_NeomaMSMS_SrF_LA_Chicago_Run2_RbSr_export_processed	3.06105e+08	55626	48389	1366.25	5.46051	0.325669	0.841097	0.00386384	0.287877	5.11134	0.416486	0.845267	0.00387064	0.212502					20220228_NeomaMSMS_SrF_LA_Chicago_Run2_RbSr_export_processed							3.81854	0.227741	0.841097	0.00386384	0.287877	4.22425	0.344203	0.845267	0.00387064	0.212502
4	FeldsparKrichBB_2	0.0127796		20220228_NeomaMSMS_SrF_LA_Chicago_Run2_RbSr_export_processed	1.72954e+08	55677	48297	1366.25	0.757484	0.130034	0.729869	0.00317535	0.495112	0.709047	0.127927	0.733488	0.00317977	0.473299					20220228_NeomaMSMS_SrF_LA_Chicago_Run2_RbSr_export_processed							0.529709	0.0909328	0.729869	0.00317535	0.495112	0.585989	0.105724	0.733488	0.00317977	0.473299
5	FeldsparKrichBB_3	1.72707		20220228_NeomaMSMS_SrF_LA_Chicago_Run2_RbSr_export_processed	5.12012e+08	55526	48291	1366.25	2.55646	1.21051	0.775633	0.0225317	0.983128	2.39299	1.14086	0.779478	0.0226416	0.976546					20220228_NeomaMSMS_SrF_LA_Chicago_Run2_RbSr_export_processed							1.78774	0.846507	0.775633	0.0225317	0.983128	1.97768	0.942862	0.779478	0.0226416	0.976546
6	FeldsparKrichBB_4	2.66434		20220228_NeomaMSMS_SrF_LA_Chicago_Run2_RbSr_export_processed	263917950	56279	50551	1423.13	7.91557	0.380919	0.893322	0.00657275	0.726058	7.40941	0.544388	0.897751	0.00659715	0.476915					20220228_NeomaMSMS_SrF_LA_Chicago_Run2_RbSr_export_processed							5.53536	0.266377	0.893322	0.00657275	0.726058	6.12348	0.449907	0.897751	0.00659715	0.476915		X
7	FeldsparKrichBB_5	6.8631		20220228_NeomaMSMS_SrF_LA_Chicago_Run2_RbSr_export_processed	2.88082e+08	56377	50617	1423.13	9.42229	0.578609	0.957193	0.0133087	0.825459	8.81979	0.730149	0.961938	0.01337	0.612885					20220228_NeomaMSMS_SrF_LA_Chicago_Run2_RbSr_export_processed							6.58901	0.404622	0.957193	0.0133087	0.825459	7.28908	0.603429	0.961938	0.01337	0.612885		X
10	FeldsparKrichBB_6	4.93893		20220228_NeomaMSMS_SrF_LA_Chicago_Run2_RbSr_export_processed	3.02015e+08	56441	50485	1423.13	8.61105	1.14074	0.948431	0.0385616	0.976481	8.01913	1.21972	0.95228	0.0387175	0.850145					20220228_NeomaMSMS_SrF_LA_Chicago_Run2_RbSr_export_processed							6.02171	0.79772	0.948431	0.0385616	0.976481	6.62738	1.00803	0.95228	0.0387175	0.850145		X
11	FeldsparKrichBB_7	5.69565		20220228_NeomaMSMS_SrF_LA_Chicago_Run2_RbSr_export_processed	2.97268e+08	56521	50355	1423.13	7.98495	0.633602	0.909709	0.0126971	0.888194	7.43607	0.810558	0.913401	0.0127468	0.645256					20220228_NeomaMSMS_SrF_LA_Chicago_Run2_RbSr_export_processed							5.58388	0.443078	0.909709	0.0126971	0.888194	6.14551	0.669883	0.913401	0.0127468	0.645256		X
12	FeldsparKrichBB_8	2.28191		20220228_NeomaMSMS_SrF_LA_Chicago_Run2_RbSr_export_processed	3.38072e+08	55042	52009	1383.44	4.98929	0.465104	0.800631	0.00521919	0.927517	4.64632	0.555143	0.803881	0.00523698	0.7214					20220228_NeomaMSMS_SrF_LA_Chicago_Run2_RbSr_export_processed							3.48901	0.325247	0.800631	0.00521919	0.927517	3.83994	0.458796	0.803881	0.00523698	0.7214
13	FeldsparKrichBB_9	0.0578406		20220228_NeomaMSMS_SrF_LA_Chicago_Run2_RbSr_export_processed	290446184	54973	52079	1383.44	0.218557	0.0159688	0.72386	0.0032286	-0.046895	0.203533	0.0212728	0.726798	0.00323722	-0.0373982					20220228_NeomaMSMS_SrF_LA_Chicago_Run2_RbSr_export_processed							0.152837	0.011167	0.72386	0.0032286	-0.046895	0.168209	0.0175808	0.726798	0.00323722	-0.0373982
14	FeldsparKrichBB_10	10.8934		20220228_NeomaMSMS_SrF_LA_Chicago_Run2_RbSr_export_processed	2.63357e+08	53921	53583	1372.19	8.17022	0.691263	0.979522	0.0245954	0.977028	7.6086	0.858927	0.983497	0.0246941	0.731542					20220228_NeomaMSMS_SrF_LA_Chicago_Run2_RbSr_export_processed							5.71344	0.483401	0.979522	0.0245954	0.977028	6.2881	0.709857	0.983497	0.0246941	0.731542		X
17	FeldsparKrichBB_11	0.139693		20220228_NeomaMSMS_SrF_LA_Chicago_Run2_RbSr_export_processed	2.36438e+08	54038	53574	1372.19	0.337954	0.0808992	0.729734	0.00247966	0.689393	0.316717	0.0794345	0.732465	0.00248133	0.658857					20220228_NeomaMSMS_SrF_LA_Chicago_Run2_RbSr_export_processed							0.236331	0.0565729	0.729734	0.00247966	0.689393	0.26175	0.0656484	0.732465	0.00248133	0.658857
18	FeldsparKrichBB_13	0.686131		20220228_NeomaMSMS_SrF_LA_Chicago_Run2_RbSr_export_processed	4.84409e+08	49768	55238	1230.31	2.46633	0.598109	0.775726	0.010356	0.993419	2.31135	0.586609	0.77863	0.0103927	0.949145					20220228_NeomaMSMS_SrF_LA_Chicago_Run2_RbSr_export_processed							1.7247	0.418258	0.775726	0.010356	0.993419	1.9102	0.484801	0.77863	0.0103927	0.949145
19	FeldsparKrichBB_14	0.0748899		20220228_NeomaMSMS_SrF_LA_Chicago_Run2_RbSr_export_processed	3.37963e+08	49728	55084	1230.31	0.302356	0.0216663	0.722299	0.00201561	0.0515021	0.283357	0.0293597	0.725003	0.00201397	0.0323956					20220228_NeomaMSMS_SrF_LA_Chicago_Run2_RbSr_export_processed							0.211438	0.0151512	0.722299	0.00201561	0.0515021	0.234179	0.0242642	0.725003	0.00201397	0.0323956
20	FeldsparKrichBB_15	2.75191		20220228_NeomaMSMS_SrF_LA_Chicago_Run2_RbSr_export_processed	3.51783e+08	49434	55599	1218.13	2.88695	0.0730184	0.77117	0.00194337	0.226103	2.70554	0.213732	0.774056	0.00193978	0.0678747					20220228_NeomaMSMS_SrF_LA_Chicago_Run2_RbSr_export_processed							2.01884	0.0510618	0.77117	0.00194337	0.226103	2.23598	0.176638	0.774056	0.00193978	0.0678747
21	FeldsparKrichBB_16	0.204868		20220228_NeomaMSMS_SrF_LA_Chicago_Run2_RbSr_export_processed	1.86775e+08	49471	55714	1218.13	1.51949	0.262046	0.74634	0.00440597	-0.585741	1.424	0.267707	0.749133	0.00441798	-0.53875					20220228_NeomaMSMS_SrF_LA_Chicago_Run2_RbSr_export_processed							1.06258	0.183249	0.74634	0.00440597	-0.585741	1.17686	0.221245	0.749133	0.00441798	-0.53875
24	FeldsparKrichBB_17	0.0559322		20220228_NeomaMSMS_SrF_LA_Chicago_Run2_RbSr_export_processed	3.49278e+08	49588	55822	1218.13	0.557055	0.213304	0.728827	0.00381676	0.950341	0.516796	0.201331	0.73167	0.00382997	0.929547					20220228_NeomaMSMS_SrF_LA_Chicago_Run2_RbSr_export_processed							0.389549	0.149163	0.728827	0.00381676	0.950341	0.427104	0.166389	0.73167	0.00382997	0.929547
25	FeldsparKrichBB_18	1.05701		20220228_NeomaMSMS_SrF_LA_Chicago_Run2_RbSr_export_processed	448223357	49325	55870	1218.13	2.41462	0.127605	0.760165	0.00314648	0.913076	2.24012	0.199602	0.763131	0.00315654	0.514527					20220228_NeomaMSMS_SrF_LA_Chicago_Run2_RbSr_export_processed							1.68855	0.0892345	0.760165	0.00314648	0.913076	1.85134	0.16496	0.763131	0.00315654	0.514527
26	FeldsparKrichBB_19	0.324427		20220228_NeomaMSMS_SrF_LA_Chicago_Run2_RbSr_export_processed	5.91873e+08	49854	56155	1218.13	2.85714	0.537719	0.781041	0.00841048	0.901538	2.65066	0.533871	0.784089	0.00844242	0.837842					20220228_NeomaMSMS_SrF_LA_Chicago_Run2_RbSr_export_processed							1.998	0.376027	0.781041	0.00841048	0.901538	2.19063	0.441216	0.784089	0.00844242	0.837842
27	FeldsparKrichBB_20	0.317726		20220228_NeomaMSMS_SrF_LA_Chicago_Run2_RbSr_export_processed	4.31928e+08	49955	56136	1218.13	1.53281	0.392525	0.750629	0.00804016	0.951172	1.42203	0.378177	0.753557	0.00807068	0.912461					20220228_NeomaMSMS_SrF_LA_Chicago_Run2_RbSr_export_processed							1.07189	0.274493	0.750629	0.00804016	0.951172	1.17523	0.312543	0.753557	0.00807068	0.912461
28	FeldsparKrichBB_21	2.06		20220228_NeomaMSMS_SrF_LA_Chicago_Run2_RbSr_export_processed	5.29003e+08	46477	56319	1099.38	1.70624	0.411288	0.750151	0.00853726	0.946306	1.58293	0.398104	0.753078	0.00856977	0.903546					20220228_NeomaMSMS_SrF_LA_Chicago_Run2_RbSr_export_processed							1.19318	0.287614	0.750151	0.00853726	0.946306	1.30821	0.329011	0.753078	0.00856977	0.903546
31	FeldsparKrichBB_22	0.830428		20220228_NeomaMSMS_SrF_LA_Chicago_Run2_RbSr_export_processed	4.38885e+08	46594	56363	1099.38	2.68645	0.230944	0.7712	0.00352789	0.95858	2.50465	0.270183	0.774221	0.00354688	0.726846					20220228_NeomaMSMS_SrF_LA_Chicago_Run2_RbSr_export_processed							1.87864	0.1615	0.7712	0.00352789	0.95858	2.06996	0.223291	0.774221	0.00354688	0.726846
32	FeldsparKrichBB_23	1.45093		20220228_NeomaMSMS_SrF_LA_Chicago_Run2_RbSr_export_processed	6.29833e+08	46506	56415	1099.38	5.91832	0.560566	0.828515	0.00773267	0.82217	5.51781	0.63437	0.831761	0.00776568	0.660559					20220228_NeomaMSMS_SrF_LA_Chicago_Run2_RbSr_export_processed							4.13869	0.392005	0.828515	0.00773267	0.82217	4.56018	0.524273	0.831761	0.00776568	0.660559
33	FeldsparKrichBB_24	0.748503		20220228_NeomaMSMS_SrF_LA_Chicago_Run2_RbSr_export_processed	1.625e+08	49526	59810	1288.13	2.63685	0.138704	0.787932	0.00797911	-0.225881	2.45841	0.205879	0.791018	0.00801276	-0.162787					20220228_NeomaMSMS_SrF_LA_Chicago_Run2_RbSr_export_processed							1.84395	0.0969959	0.787932	0.00797911	-0.225881	2.03174	0.170148	0.791018	0.00801276	-0.162787
34	FeldsparKrichBB_25	9.625		20220228_NeomaMSMS_SrF_LA_Chicago_Run2_RbSr_export_processed	3.01872e+08	49513	59924	1288.13	8.4743	0.377847	0.904312	0.00547997	0.724119	7.90082	0.623828	0.907855	0.00550601	0.371461					20220228_NeomaMSMS_SrF_LA_Chicago_Run2_RbSr_export_processed							5.92608	0.264228	0.904312	0.00547997	0.724119	6.5296	0.51556	0.907855	0.00550601	0.371461		X
35	FeldsparKrichBB_26	1.49638		20220228_NeomaMSMS_SrF_LA_Chicago_Run2_RbSr_export_processed	6.48271e+08	44439	55469	988.44	3.99782	0.294828	0.804235	0.0105003	0.941769	3.72728	0.366808	0.807386	0.0105433	0.691782					20220228_NeomaMSMS_SrF_LA_Chicago_Run2_RbSr_export_processed							2.79568	0.206173	0.804235	0.0105003	0.941769	3.08039	0.303147	0.807386	0.0105433	0.691782
38	FeldsparKrichBB_27	15.044		20220228_NeomaMSMS_SrF_LA_Chicago_Run2_RbSr_export_processed	7.68024e+07	45024	44575	930	26.3819	2.83026	1.24986	0.0176698	0.0898479	25.0058	2.96405	1.25451	0.0177344	0.0762831					20220228_NeomaMSMS_SrF_LA_Chicago_Run2_RbSr_export_processed							18.4489	1.9792	1.24986	0.0176698	0.0898479	20.6659	2.44963	1.25451	0.0177344	0.0762831		X
39	FeldsparKrichBB_28	16.0889		20220228_NeomaMSMS_SrF_LA_Chicago_Run2_RbSr_export_processed	5.38642e+07	45149	44511	930	39.5091	1.1949	1.56414	0.0279362	0.331226	37.4482	2.20151	1.56995	0.028039	0.162365					20220228_NeomaMSMS_SrF_LA_Chicago_Run2_RbSr_export_processed							27.6287	0.835596	1.56414	0.0279362	0.331226	30.949	1.81943	1.56995	0.028039	0.162365		X
40	FeldsparKrichBB_29	11.931		20220228_NeomaMSMS_SrF_LA_Chicago_Run2_RbSr_export_processed	7.27073e+07	45239	44430	930	25.5643	1.07494	1.39585	0.019835	-0.228916	24.2308	1.59066	1.40104	0.0199076	-0.15569					20220228_NeomaMSMS_SrF_LA_Chicago_Run2_RbSr_export_processed							17.8771	0.751707	1.39585	0.019835	-0.228916	20.0255	1.3146	1.40104	0.0199076	-0.15569		X
41	FeldsparKrichBB_30	6.30964		20220228_NeomaMSMS_SrF_LA_Chicago_Run2_RbSr_export_processed	1.83992e+08	45279	44309	930	10.6047	0.676434	0.929295	0.0112312	0.815644	10.0515	0.817212	0.934624	0.0112946	0.631381					20220228_NeomaMSMS_SrF_LA_Chicago_Run2_RbSr_export_processed							7.41587	0.473031	0.929295	0.0112312	0.815644	8.30706	0.675381	0.934624	0.0112946	0.631381		X
42	FeldsparKrichBB_31	1.12564		20220228_NeomaMSMS_SrF_LA_Chicago_Run2_RbSr_export_processed	4.95647e+08	46155	44257	930	2.16938	0.0669888	0.758836	0.00251152	0.46837	2.05622	0.121558	0.761659	0.00251798	0.201719					20220228_NeomaMSMS_SrF_LA_Chicago_Run2_RbSr_export_processed							1.51705	0.0468453	0.758836	0.00251152	0.46837	1.69936	0.100462	0.761659	0.00251798	0.201719
43	FeldsparKrichBB_32	0.128276		20220228_NeomaMSMS_SrF_LA_Chicago_Run2_RbSr_export_processed	4.62282e+08	51485	46493	1187.5	0.470395	0.419703	0.731252	0.00182017	0.901034	0.445859	0.411094	0.733971	0.00182298	0.856169					20220228_NeomaMSMS_SrF_LA_Chicago_Run2_RbSr_export_processed							0.328948	0.293499	0.731252	0.00182017	0.901034	0.368478	0.339747	0.733971	0.00182298	0.856169
Davidson, J., Tepley III, F., Palacz, Z., & Meffan-Main, S. (2001). Magma recharge, contamination and residence times revealed by in situ laser ablation isotopic analysis of feldspar in volcanic rocks. Earth and Planetary Science Letters, 184(2), 427-442.
Davidson, J., Charlier, B., Hora, J. M., & Perlroth, R. (2005). Mineral isochrons and isotopic fingerprinting: Pitfalls and promises. Geology, 33(1), 29-32.
Woodhead, J. D., & Hergt, J. M. (2001). Strontium, neodymium and lead isotope analyses of NIST glass certified reference materials: SRM 610, 612, 614. Geostandards Newsletter, 25(2‐3), 261-266.
Yang, Y.H., Wu, F.Y., Yang, J.H., Chew, D.M., Xie, L.W., Chu, Z.Y., Zhang, Y.B. and Huang, C. (2014). Sr and Nd isotopic compositions of apatite reference materials used in U–Th–Pb geochronology. Chemical Geology, 385, 35-55.
94	BB_23			20220223_NeomaMSMS_SrF_LA_Chicago_Run1_RbSr_export_processed	1.10232e+06	48939	46420	1124.69	-0.982675	0.629121	#VALUE!	#VALUE!	#VALUE!	-0.878937	-0.568456	#VALUE!	#VALUE!	#VALUE!					20220223_NeomaMSMS_SrF_LA_Chicago_Run1_RbSr_export_processed
95	BB_24			20220223_NeomaMSMS_SrF_LA_Chicago_Run1_RbSr_export_processed	1.14671e+06	48810	46566	1135	0.386606	1.19503	0.734876	9.33619	#VALUE!	0.345793	1.06935	0.736386	9.35537	#VALUE!					20220223_NeomaMSMS_SrF_LA_Chicago_Run1_RbSr_export_processed
96	BB_25			20220223_NeomaMSMS_SrF_LA_Chicago_Run1_RbSr_export_processed	1.52987e+06	48959	46113	1138.13	-0.148968	-2.36432	0.765596	1.12198	#VALUE!	-0.133242	-2.11476	0.767169	1.12428	#VALUE!					20220223_NeomaMSMS_SrF_LA_Chicago_Run1_RbSr_export_processed
97	BB_26			20220223_NeomaMSMS_SrF_LA_Chicago_Run1_RbSr_export_processed	1.12097e+06	48657	46308	1136.56	0.672928	8.6394	-0.441846	-24.3731	#VALUE!	0.601889	7.72757	-0.442753	-24.4231	#VALUE!					20220223_NeomaMSMS_SrF_LA_Chicago_Run1_RbSr_export_processed
98	BB_27			20220223_NeomaMSMS_SrF_LA_Chicago_Run1_RbSr_export_processed	-1.39312e+07	49848	46718	1161.56	-0.0102031	-0.0334368	0.6773	0.0418338	0.255974	-0.00912595	-0.0299187	0.678692	0.0419199	0.255767					20220223_NeomaMSMS_SrF_LA_Chicago_Run1_RbSr_export_processed
101	BB_28			20220223_NeomaMSMS_SrF_LA_Chicago_Run1_RbSr_export_processed	1.09977e+06	49868	46874	1169.38	-1.21687	-0.362818	-0.137306	-0.894406	#VALUE!	-1.09519	-0.33793	-0.137561	-0.896069	#VALUE!					20220223_NeomaMSMS_SrF_LA_Chicago_Run1_RbSr_export_processed
								K/Rb	298	K2O/Rb	358.987	K2O/87Rb	110356
								Ca/Sr	1170	CaO/Sr	1637.09	CaO/86Sr	1.45478e+06
													13.1826

## Sheet: Instrumental Conditions
Table 1. Instrumental conditions
Parameter	Value	Unit		Parameter	Value	Unit
ESI Apex Omega Q desolvating nebulizer system.				ESI NWR193 UC laser ablation system with TwoVol2 Cell.
Argon	3.8	L/min		Helium	1.2	L/min
Nitrogen	3	mL/min		Nitrogen	4	mL/min
Spray Chamber	140	°C		Spot Size	100	µm
Peltier	3	°C		Fluence	5	J/cm2
Desolvator	155	°C		Repetition Rate	20	Hz
Peripump	17	rpm		Dwell Time	60	s
Thermo Scientific Neoma MC-ICP-MS with MS/MS Option.				Thermo Scientific Neoma MC-ICP-MS with MS/MS Option.
Cool Gas Flow	14	L/min		Cool Gas Flow	14	L/min
Auxilary Gas Flow	0.8	L/min		Auxilary Gas Flow	0.8	L/min
Nebulizer Gas Flow	0.9	L/min		Nebulizer Gas Flow	0.89	L/min
Torch Horizontal Position	-1.4	mm		Torch Horizontal Position	-1.35	mm
Torch Vertical Position	-1.05	mm		Torch Vertical Position	-0.95	mm
Sampling Depth	5	mm		Sampling Depth	6.5	mm
Plasma Power	1200	W		Plasma Power	1200	W
Resolving Power	2100	MRP		Resolving Power	2100	MRP
Focus	52	%		Focus	52	%
X Deflection	-14.8	%		X Deflection	-14.8	%
Y Deflection	-3	%		Y Deflection	-3	%
Shape	46.4	%		Shape	46.4	%
Wien Filter Magnetic Field	50	%		Wien Filter Magnetic Field	50	%
Wien Filter Electric Field	320	V		Wien Filter Electric Field	320	V
Wien Focus 1	-440	V		Wien Focus 1	-440	V
Wien Focus 1 X Symmetry	0	V		Wien Focus 1 X Symmetry	0	V
Wien Focus 1 Y Symmetry	15	V		Wien Focus 1 Y Symmetry	15	V
Slit Angle	60	°		Slit Angle	60	°
Wien Focus 2	-395	V		Wien Focus 2	-395	V
Wien Focus 3	-370	V		Wien Focus 3	-370	V
Wien Focus 3 X Symmetry	0	V		Wien Focus 3 X Symmetry	0	V
Wien Focus 3 Y Symmetry	-13	V		Wien Focus 3 Y Symmetry	-13	V
CCT Entry	-50	V		CCT Entry	-50	V
CCT Bias	0	V		CCT Bias	0	V
CCT RF Amplitude	100	%		CCT RF Amplitude	100	%
CCT Exit 1	-85	V		CCT Exit 1	-85	V
CCT Exit 2	-100	V		CCT Exit 2	-100	V
CCT SF6	36	µL/min		CCT SF6	36	µL/min
Table 2. Cup configuration
	L5	L4	L3	L2	L1	C	H1	H2	H3	H4	H5
Rb			85Rb	86Sr	87Rb	88Sr	89Y	90Zr
SrF			83KrF	84SrF	85RbF	86SrF	87SrF	88SrF
Amplifer Assignment			1011 Ω	1011 Ω	1011 Ω	1011 Ω	1011 Ω	1011 Ω
